# Supplementary material for: The root-knot nematode effector Mi2G02 hijacks a host plant trihelix transcription factor to promote nematode parasitism
Source: PubMed Central journal article supplement — Plant Commun. 2023 Sep 22;5(2):100723. doi: 10.1016/j.xplc.2023.100723 (PMC10873892; doi:10.1016/j.xplc.2023.100723), 2023-09-22
Supplement: mmc1.pdf [file mmc1.pdf]

**Plant Communications, Volume 5**

**Supplemental information**

**The root-knot nematode effector Mi2G02 hijacks a host plant trihelix transcription factor to promote nematode parasitism**

**Jianlong Zhao, Kaiwei Huang, Rui Liu, Yuqing Lai, Pierre Abad, Bruno Favery, Heng Jian, Jian Ling, Yan Li, Yuhong Yang, Bingyan Xie, Michaël Quentin, and Zhenchuan Mao**

## Supplemental Information

### A root-knot nematode effector Mi2G02 hijacks a host plant trihelix transcription factor for nematode parasitism

Jianlong Zhao<sup>1,4,\*</sup>, Kaiwei Huang<sup>1,4</sup>, Rui Liu<sup>1,4</sup>, Yuqing Lai<sup>1</sup>, Pierre Abad<sup>2</sup>, Bruno Favery<sup>2</sup>, Heng Jian<sup>3</sup>, Jian Ling<sup>1</sup>, Yan Li<sup>1</sup>, Yuhong Yang<sup>1</sup>, Bingyan Xie<sup>1</sup>, Michaël Quentin<sup>2,\*</sup> and Zhenchuan Mao<sup>1,\*</sup>

<sup>1</sup> State Key Laboratory of Vegetable Biobreeding, Institute of Vegetables and Flowers, Chinese Academy of Agricultural Sciences, 100081, Beijing, China

<sup>2</sup> INRAE, Université Côte d'Azur, CNRS, ISA, F-06903, Sophia Antipolis, France

<sup>3</sup> Department of Plant Pathology and Key Laboratory of Pest Monitoring and Green Management of the Ministry of Agriculture, China Agricultural University, 100193, Beijing, China

<sup>4</sup> These authors contributed equally: Jianlong Zhao, Kaiwei Huang, Rui Liu.

\* **Corresponding:** Email: Jianlong Zhao ([zhaojianlong@caas.cn](mailto:zhaojianlong@caas.cn)), Michaël Quentin ([michael.quentin@inrae.fr](mailto:michael.quentin@inrae.fr)), Zhenchuan Mao ([maozhenchuan@caas.cn](mailto:maozhenchuan@caas.cn)).

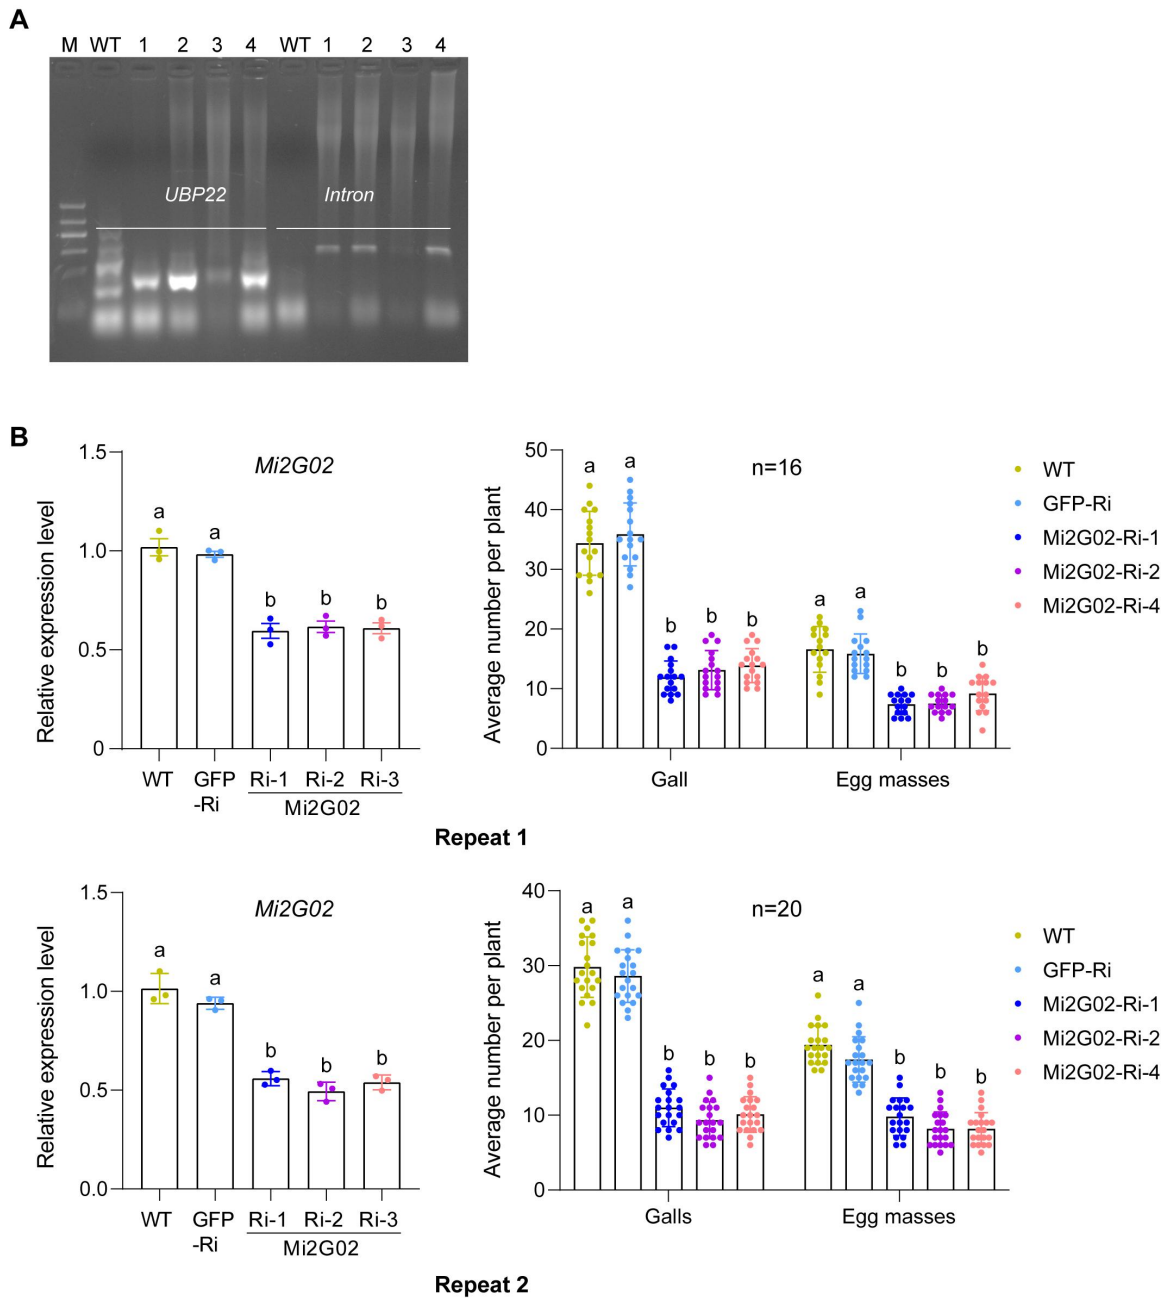

**Supplemental Figure 1.** Verification of the homozygous *Mi2G02* RNAi *Arabidopsis thaliana* lines and analysis of their susceptibility to *Meloidogyne incognita*.

**(A)** PCR was performed to verify intron expression using genomic DNA from wild-type (WT) and four independent *Mi2G02* RNAi *A. thaliana* lines (1, *Mi2G02*-

Ri-1; 2, Mi2G02-Ri-2; 3, Mi2G02-Ri-3; 4, Mi2G02-Ri-4). *UBP22* (*AT5G10790*) was used as an internal control.

**(B)** Two independent nematode infection assays using *Mi2G02* RNAi *A. thaliana* lines. *Mi2G02* expression level in nematodes recovered from three homozygous RNAi lines (Mi2G02-Ri-1, Mi2G02-Ri-2 and Mi2G02-Ri-4), gfp-RNAi line (GFP-Ri) and wild-type (WT) were determined at 10 days post-infection (dpi) with *M. incognita* by RT-qPCR. *GAPDH* was used as an internal control. The values shown are means  $\pm$  SE (n = 3). Gall numbers and egg masses were counted at 35 dpi. Values are presented as means  $\pm$  SD (n=16 or n=20). Different letters indicate significant differences ( $P < 0.05$ , one-way ANOVA).

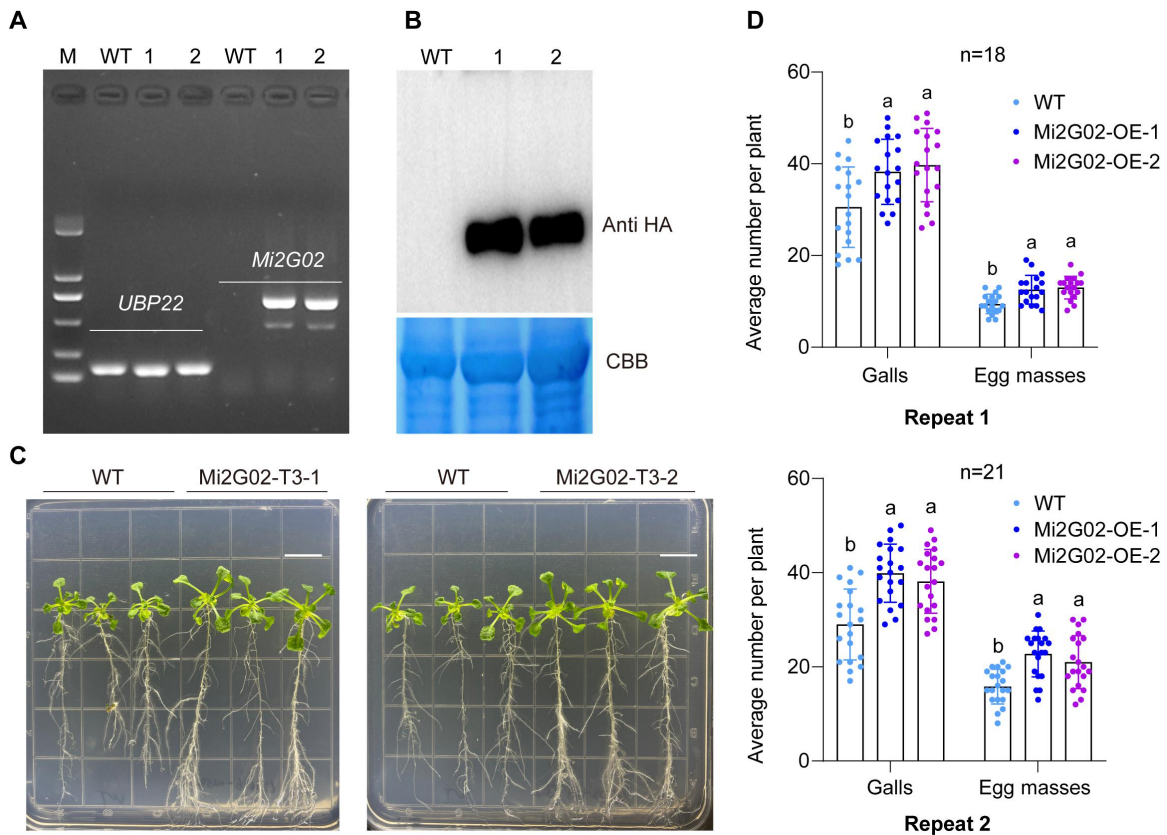

**Supplemental Figure 2.** Verification of the homozygous *Mi2G02*-expressing *A. thaliana* lines and analysis of their susceptibility to *M. incognita*.

**(A)** Semi-quantitative RT-PCR was performed to verify *Mi2G02* expression using cDNA of wild-type and two homozygous *Mi2G02*-expressing *A. thaliana* lines (1, *Mi2G02*-T3-1; 2, *Mi2G02*-T3-2). *UBP22* (*AT5G10790*) was used as an internal control.

**(B)** Western-blot using anti-HA antibody was conducted to verify *Mi2G02*-HA expression in *Mi2G02*-T3-1 and *Mi2G02*-T3-2. CBB, coomassie brilliant blue, was used to check protein samples loading.

**(C)** Root phenotypes of *Mi2G02*-expressing *A. thaliana* lines compared with wild-type plants (WT) under normal growth conditions. The photographs were taken after 14 days. The experiments were repeated three times with similar results, representative pictures are shown. Scale bars, 1 cm.

**(D)** Two independent nematode infection assays using *Mi2G02*-expressing *A. thaliana* lines. Gall numbers and egg masses were counted at 35 dpi. Values are

presented as means  $\pm$  SD (n=18 or n=21). Different letters indicate significant differences ( $P < 0.05$ , one-way ANOVA).

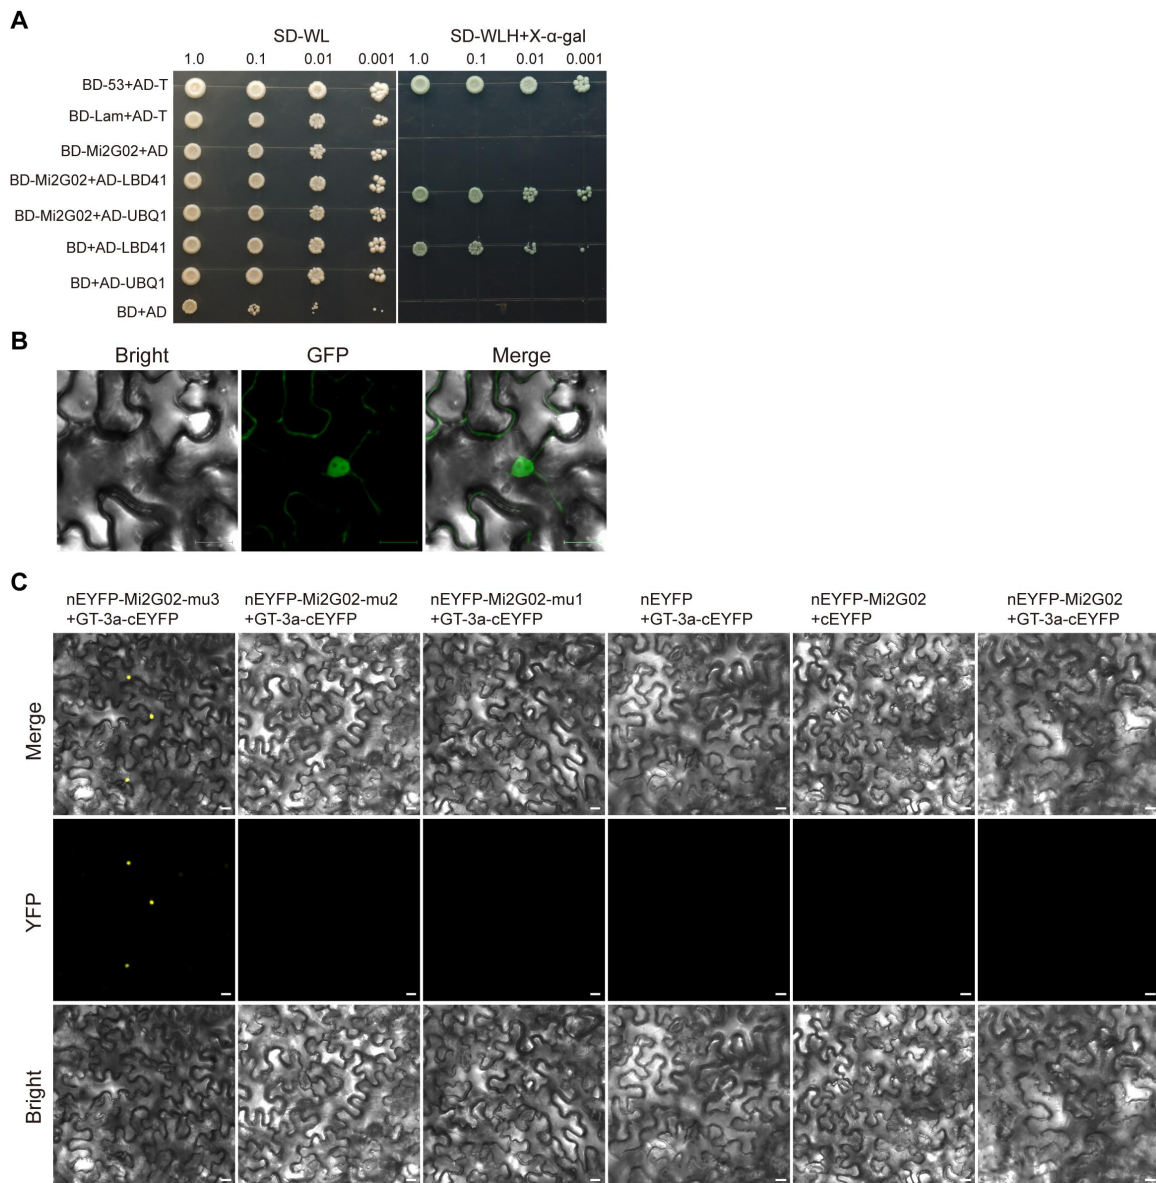

**Supplemental Figure 3.** Interactions verification between Mi2G02 and GT-3a.

**(A)** Autoactivation of LBD41, and GT-3a could not interact with UBQ1 in yeast system. Pairwise yeast two-hybrid (Y2H) tests were performed to investigate the interactions between Mi2G02 and LBD41 or UBQ1. Left column, yeast cell growth carrying the baits in pGBKT7 vector (BD) and preys in pGADT7 (AD) grown on SD/-Trp-Leu (SD-WL) medium indicating successful transformation of the yeast with both plasmids; right column, yeast cell growth on the selective dropout medium (SD/-Trp-Leu-His, SD-WLH) following the addition of 20 mg/ml

X- $\alpha$ -gal indicating protein interaction. Yeast cells containing p53 and SV40 large T-antigen were used as positive control, and yeast cells containing Lamin and SV40 large T-antigen were used as negative control.

**(B)** Subcellular localization of Mi2G02-ShKT-GFP in *N. benthamiana* leaf cells. Coding sequence of *Mi2G02-ShKT* was constructed into *ProSuper:GFP* (C-terminus GFP) vector. Mi2G02-ShKT-GFP was expressed in *Nicotiana benthamiana* leaf cells. The fluorescence signal was detected at 48 hours after infiltration. Images were captured by confocal microscopy (Zeiss LSM 700, Germany). GFP, green fluorescent protein. Scale bars, 20  $\mu$ m.

**(C)** Bimolecular fluorescence complementation (BiFC) experiments demonstrate the interaction between Mi2G02 and GT-3a. *N. benthamiana* leaf epidermal cells were transformed with different combinations of nEYFP- and cEYFP-fusion vectors. Images were obtained 48 h after co-expression. Yellow Fluorescent Protein (YFP) fluorescence signals were observed in the nuclei in leaves co-infiltrated with nEYFP-Mi2G02 and GT-3a-cEYFP. Scale bars, 20  $\mu$ m.



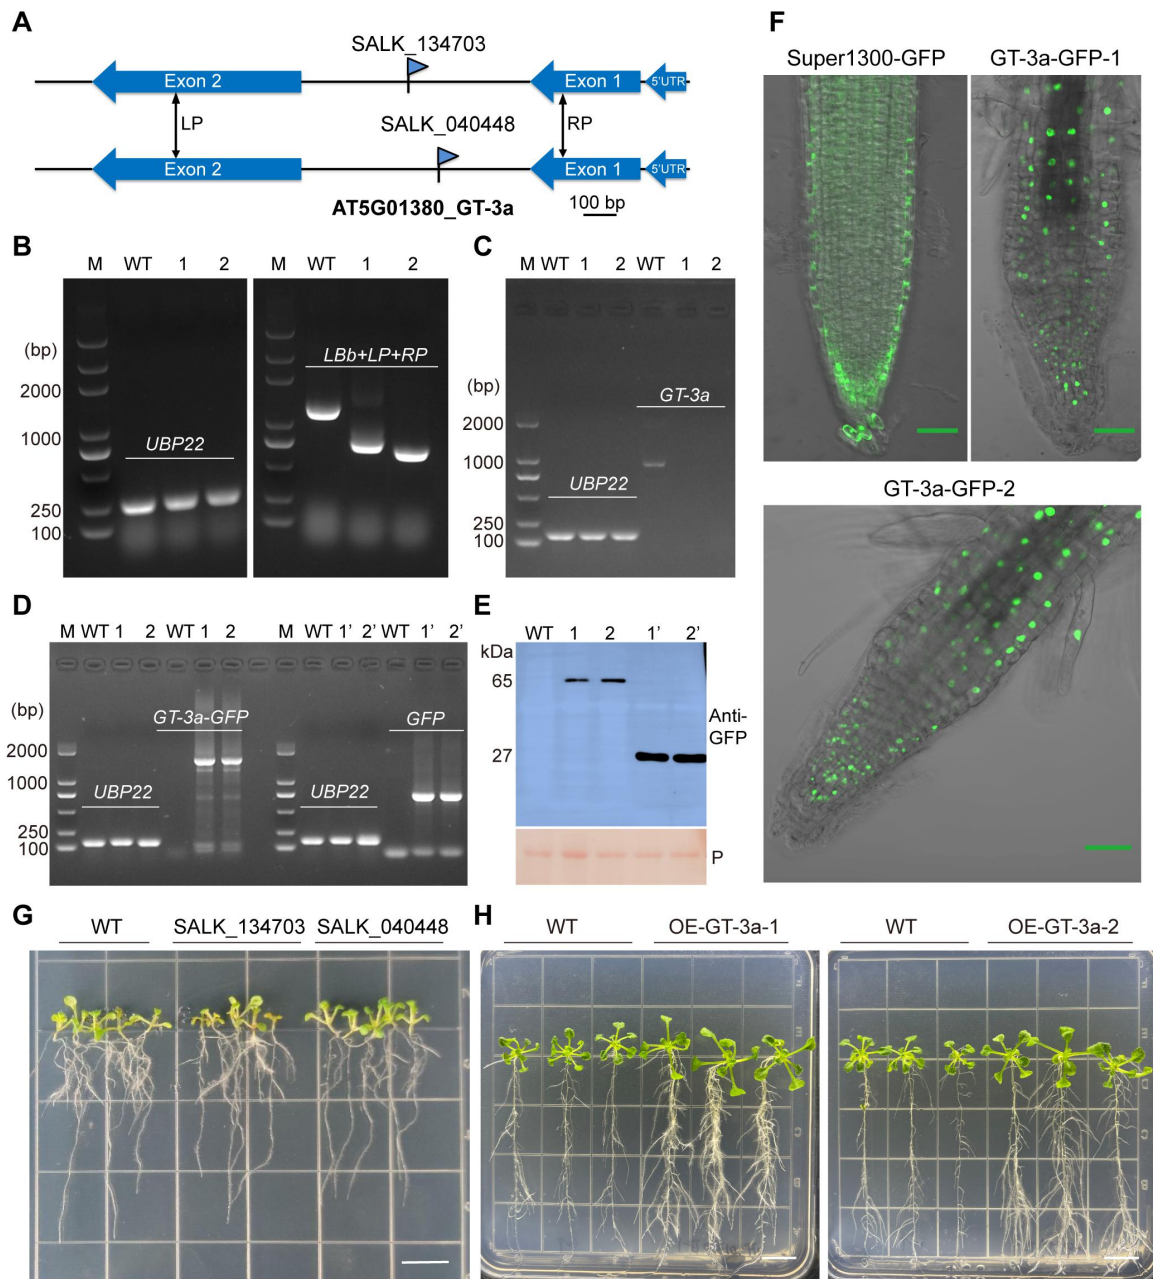

**Supplemental Figure 4.** Verification of the homozygous *gt-3a* T-DNA knockout mutants and *GT-3a*-overexpressing *A. thaliana* lines.

(A) Schematic representation of the two *gt-3a* T-DNA insertion mutants.

(B) PCR using genomic DNA was conducted to verify homozygous *gt-3a* KO mutants. 1, SALK\_134703; 2, SALK\_040448. *UBP22* (*AT5G10790*) was used as an internal control.

**(C)** Semi-quantitative RT-PCR using cDNA was conducted to verify homozygous *gt-3a* KO mutants. 1, SALK\_134703; 2, SALK\_040448. *UBP22* (*AT5G10790*) was used as an internal control.

**(D)** Semi-quantitative RT-PCR using cDNA was conducted to verify homozygous *GT-3a*- and *GFP*-overexpressing *A. thaliana* lines. 1, OE-GT-3a-1; 2, OE-GT-3a-2; 1', OE-GFP-1; 2', OE-GFP-2. *UBP22* (*AT5G10790*) was used as an internal control.

**(E)** Western blot using anti-GFP antibodies was conducted to verify *GT-3a*-GFP expression (predicted about 65 kDa) in OE-GT-3a-1 and OE-GT-3a-2, and *GFP* expression (predicted about 27 kDa) in OE-GFP-1 and OE-GFP-2. P, ponceau staining indicated loading control.

**(F)** Localization of the *ProSuper*:GFP and *ProSuper*:*GT-3a*-GFP fusions under the control of the *Super* promoter in *A. thaliana* roots. Scale bars, 50  $\mu$ m.

**(G and H)** Root phenotypes of *gt-3a* KO mutants and *GT-3a*-overexpressing *A. thaliana* lines compared with wild-type plants under normal conditions. The photographs were taken after 14 days. The experiments were repeated three times with similar results, representative pictures are shown. Scale bars, 1 cm.

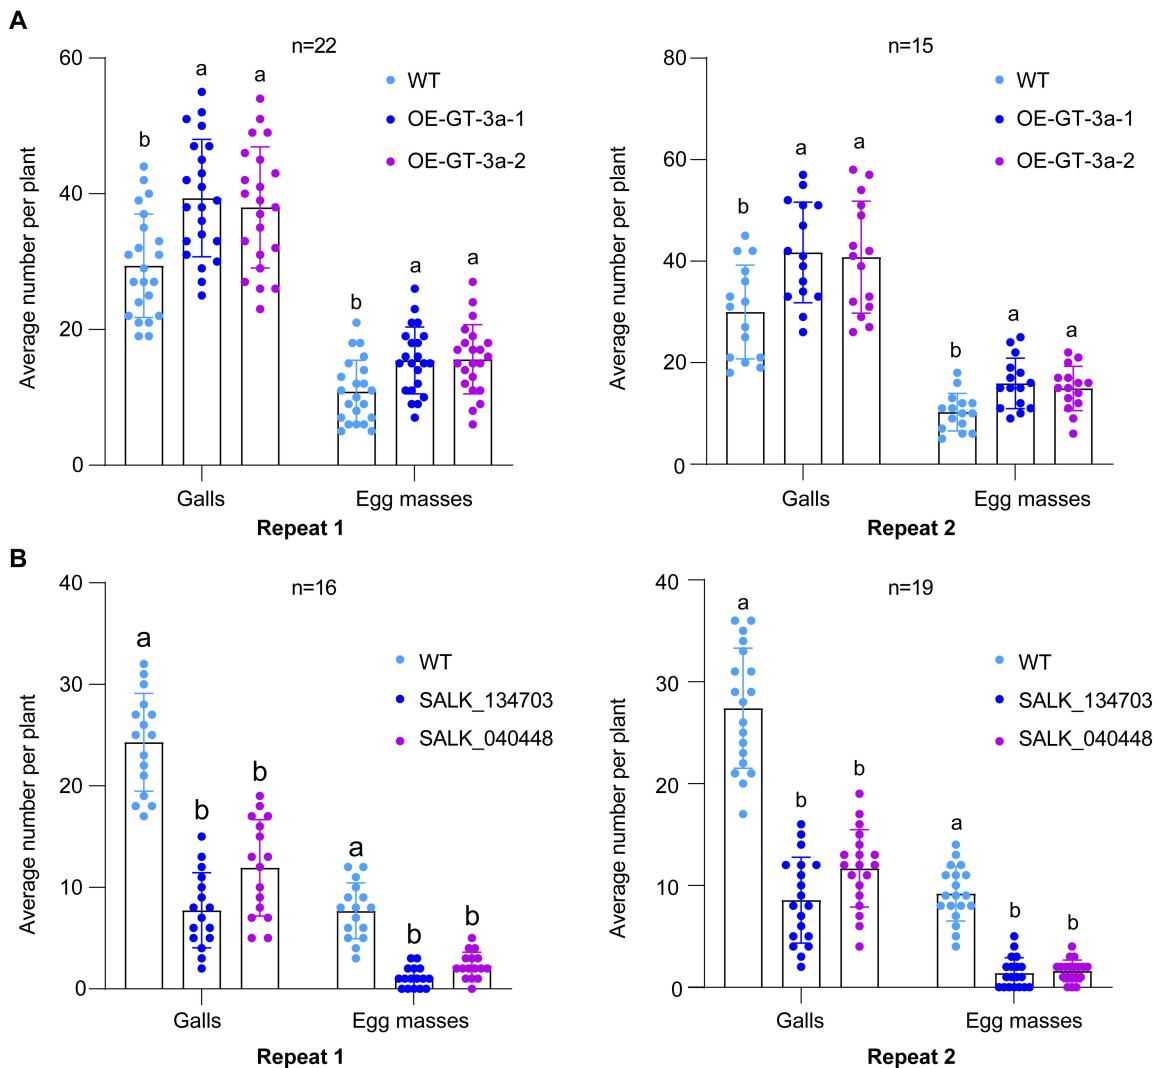

**Supplemental Figure 5.** Analysis of the susceptibility of the homozygous *GT-3a*-overexpressing *A. thaliana* lines and *gt-3a* T-DNA knockout mutant lines to *M. incognita*.

**(A)** Two independent nematode infection assays using *GT-3a* overexpressing *A. thaliana* lines were performed. Gall numbers and egg masses were counted at 35 dpi. Values are presented as means  $\pm$  SD (n=22 or n=15). Different letters indicate significant differences ( $P < 0.05$ , one-way ANOVA).

**(B)** Two independent nematode infection assays using *gt-3a* *A. thaliana* mutants. Galls and egg masses were counted at 35 dpi. Values are presented as means  $\pm$  SD (n=16 or n=19). Different letters indicate significant differences ( $P < 0.05$ , one-way ANOVA).

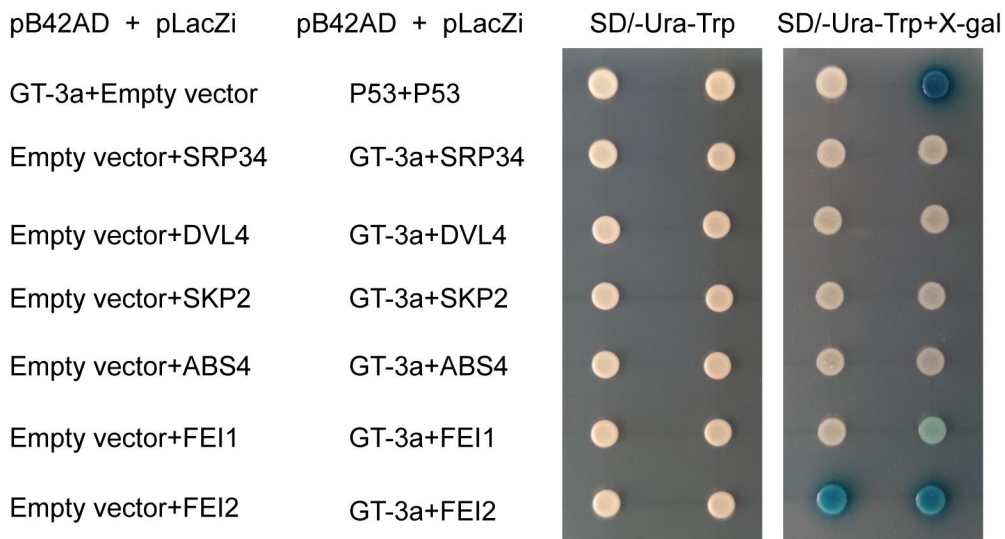

**Supplemental Figure 6.** Yeast one-hybrid (Y1H) assays verify targeting genes by GT-3a.

*FEI2* containing -CACGTG- motif showed self-activation in Y1H assays. Y1H results showed that GT-3a could bind to the promoter of *FEI1*, but the activity was low. Y1H experiments showed that GT-3a could not bind to the promoter of *SRP34*, *DVL4*, *SKP2*, *ABS4*. Promoter fragments containing -CACGTG- motif were cloned into pLacZi vector, GT-3a was cloned into pB42AD vector, and then pLacZi vector co-transformed with pB42AD-GT-3a into yeast strain EGY48. The yeast transformants were spotted on the plate SD/-Ura-Trp with or without 20 mg/ml X-gal.

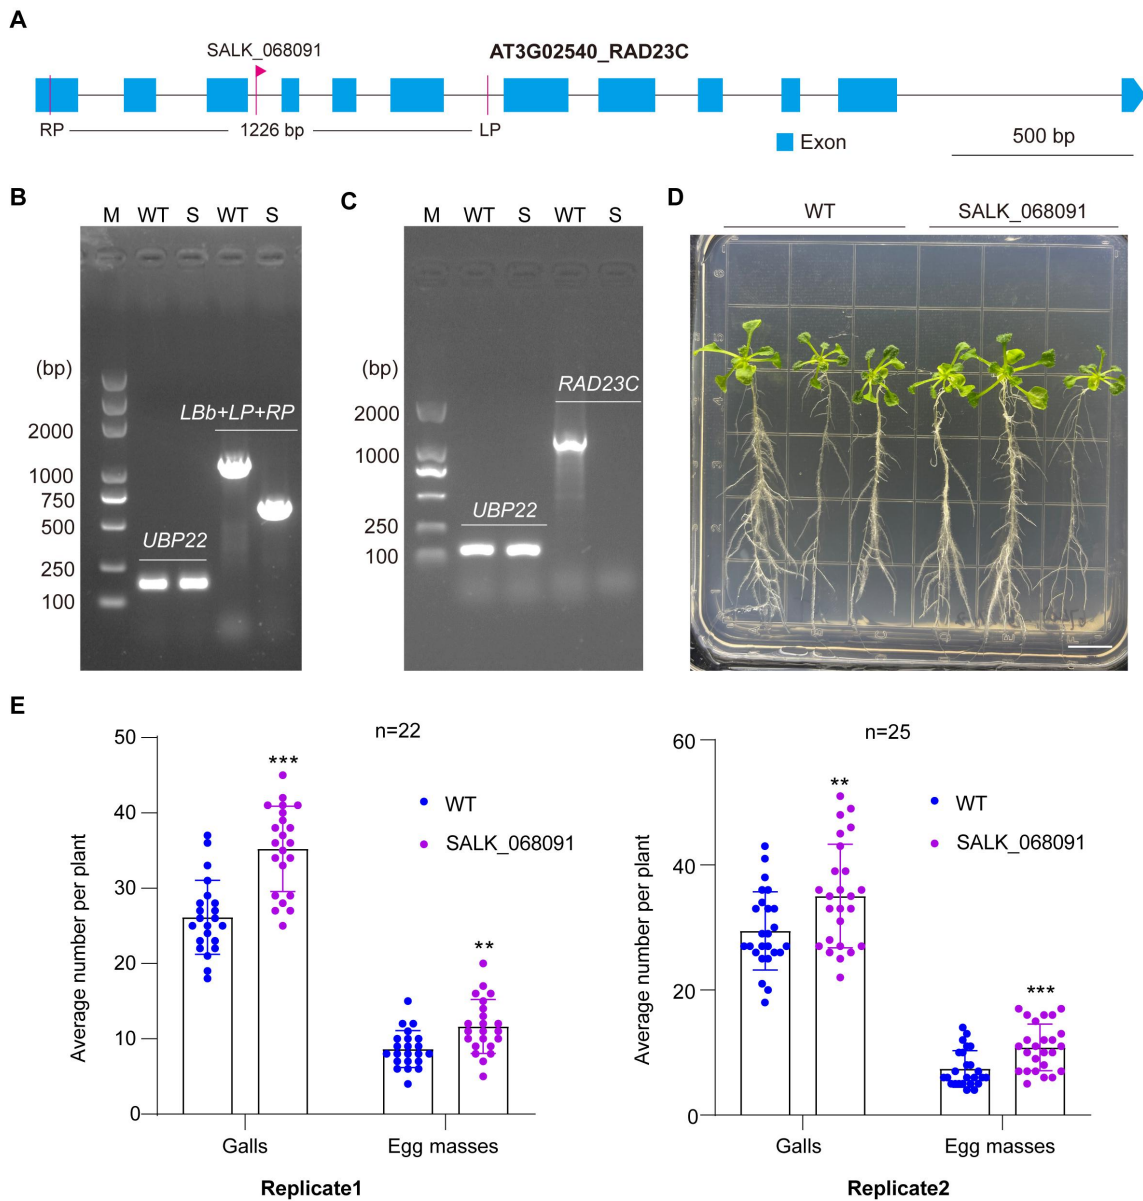

**Supplemental Figure 7.** Verification of the homozygous *rad23c* T-DNA knockout mutant *A. thaliana* line and phenotype.

**(A)** Schematic representation of T-DNA insertion *rad23c* mutants

(*SALK\_068091*). LP, RP indicate left and right genomic primers. The red triangle indicates the insertion site.

**(B)** PCR using genomic DNA was conducted to verify homozygous *rad23c* KO mutants. S, *SALK\_068091*. *UBP22* (*AT5G10790*) was used as an internal control.

**(C)** Semi-quantitative RT-PCR using cDNA was conducted to verify homozygous *rad23c* KO mutants. S, SALK\_068091. *UBP22* (*AT5G10790*) was used as an internal control.

**(D)** The *rad23c* mutants showed no significant difference of root phenotypes when compared with wild-type plants under normal growth conditions. The photographs were taken after 14 days, and a representative picture is shown. Scale bars, 1cm.

**(E)** The *rad23c* T-DNA knockout mutant is more susceptible than the wild type to *M. incognita*. The *rad23c* KO mutant (SALK\_068091) was inoculated with nematodes, and the numbers of galls and egg masses were counted 35 days post-inoculation. The data presented are the mean numbers per plant  $\pm$  SD ( $n=22$  or  $n=25$ ). Asterisks indicate differences that were significant in two-tailed Student's *t* tests, \*\* $P<0.01$ , \*\*\* $P<0.001$ .

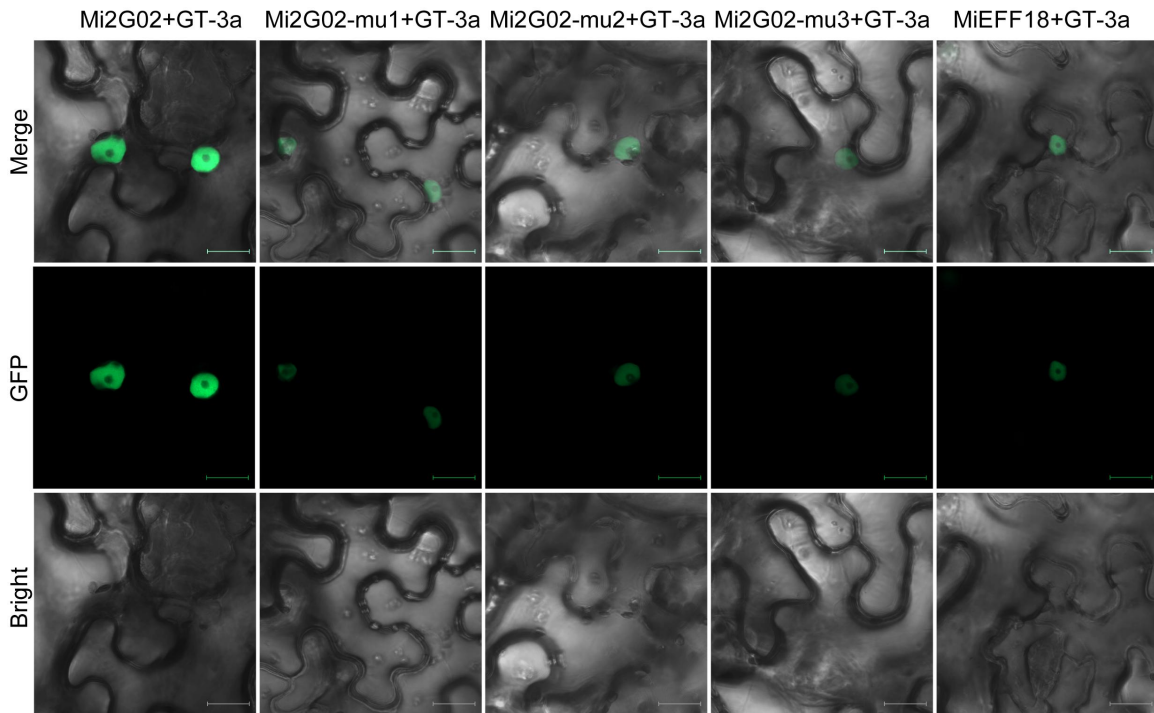

**Supplemental Figure 8.** Mi2G02 stabilizes the GT-3a-GFP fluorescence intensity.

*GT-3a* was co-expressed with *Mi2G02* or *GFP* in *N. benthamiana* leaves, and mutant *Mi2G02* and *MiEFF18* (a nuclear *M. incognita* effector not interacted with *GT-3a*) were used as controls. The *GT-3a*-GFP fluorescence was detected with confocal microscopy (LSM700, Zeiss) after 48 h post infiltration. GFP, green fluorescent protein. Scale bars, 20  $\mu$ m.



**Supplemental Table 1. *Arabidopsis thaliana* candidate proteins interacting with Mi2G02 identified by yeast two-hybrid assays.**

| Genes     | Functional annotation in TAIR                                                                                                                                            | Number of clones | In/Out of frame | Screening region       |
|-----------|--------------------------------------------------------------------------------------------------------------------------------------------------------------------------|------------------|-----------------|------------------------|
| AT5G01380 | Homeodomain-like superfamily protein, regulation of transcription                                                                                                        | 5                | In frame        | 14-210aa (1-323aa)     |
| AT3G52590 | <i>Arabidopsis thaliana</i> ubiquitin extension protein 1 mRNA involved in embryo development ending in seed dormancy, protein ubiquitination, translation               | 4                | In frame        | 5-108aa (1-128aa)      |
| AT3G02550 | <i>Arabidopsis thaliana</i> LOB domain-containing protein, regulation of transcription                                                                                   | 4                | In frame        | 91-263aa (1-263aa)     |
| AT1G61170 | <i>Arabidopsis thaliana</i> mRNA for hypothetical protein                                                                                                                | 2                | In frame        | 44-251aa (251aa)       |
| AT4G23650 | <i>Arabidopsis thaliana</i> calcium-dependent protein kinase 6 mRNA                                                                                                      | 2                | In frame        | 6-333aa (1-529aa)      |
| AT1G09070 | <i>Arabidopsis thaliana</i> uncharacterized protein mRNA, <i>Arabidopsis thaliana</i> At1g09070/F7G19_6 mRNA                                                             | 1                | In frame        | 1-277aa (1-324aa)      |
| AT1G28060 | <i>Arabidopsis thaliana</i> Pre-mRNA-splicing factor 3 mRNA                                                                                                              | 1                | In frame        | 1-308aa (1-786aa)      |
| AT1G28290 | <i>Arabidopsis thaliana</i> arabinogalactan protein 31 mRNA                                                                                                              | 1                | In frame        | 1-308aa (1-786aa)      |
| AT1G31970 | <i>Arabidopsis thaliana</i> stress response suppressor 1 mRNA                                                                                                            | 1                | In frame        | 1-250aa (1-537aa)      |
| AT1G56660 | MAEBL domain protein                                                                                                                                                     | 1                | Out of frame    |                        |
| AT2G37190 | <i>Arabidopsis thaliana</i> ribosomal protein L11 family protein mRNA, complete cds                                                                                      | 1                | In frame        | 1-166aa (1-166aa)      |
| AT3G01170 | <i>Arabidopsis thaliana</i> ribosomal protein L34e superfamily protein mRNA,                                                                                             | 1                | In frame        | 134-215aa (1-215aa)    |
| AT3G62240 | <i>Arabidopsis thaliana</i> RING/U-box domain-containing protein mRNA                                                                                                    | 1                | In frame        | 415-679aa (1-812aa)    |
| AT3G42660 | Ctf4 related nuclear protein. Interacts with LHP1-PRC2 to maintain H3K27 methylation in rapidly dividing cells. EOL1 expression is restricted to rapidly dividing cells. | 1                | In frame        | 156-533aa (1-953aa)    |
| AT3G53430 | <i>Arabidopsis thaliana</i> mRNA for 60S ribosomal Protein L12 -like                                                                                                     | 1                | Out of frame    |                        |
| AT4G38710 | <i>Arabidopsis thaliana</i> glycine-rich protein mRNA, translational initiation                                                                                          | 1                | In frame        | 1-215aa (1-452aa)      |
| AT5G38840 | <i>Arabidopsis thaliana</i> SMAD/FHA domain-containing protein mRNA                                                                                                      | 1                | In frame        | 2-304aa (1-735aa)      |
| AT5G42950 | <i>Arabidopsis thaliana</i> GYF domain-containing protein                                                                                                                | 1                | In frame        | 1088-1418aa (1-1714aa) |
| AT5G53000 | PP2A-associated protein with a possible function in the chilling response                                                                                                | 1                | In frame        | 1-220aa (1-405aa)      |
| AT5G56290 | <i>Arabidopsis thaliana</i> putative peroxisomal targeting signal type 1 receptor protein (At5g56290) mRNA                                                               | 1                | Out of frame    |                        |



**Supplemental Table 2. *Arabidopsis thaliana* candidate genes targeted by the GT-3a protein.**

| Genes     | Function predication in TAIR                                                                                                                                                                                                                                                      |
|-----------|-----------------------------------------------------------------------------------------------------------------------------------------------------------------------------------------------------------------------------------------------------------------------------------|
| AT1G02840 | ATSRP34, Splicing Factors (SR proteins).                                                                                                                                                                                                                                          |
| AT1G13245 | DVL4, negative regulation of cell population proliferation.                                                                                                                                                                                                                       |
| AT1G21410 | AtSKP2, positive regulation of cell division.                                                                                                                                                                                                                                     |
| AT1G31420 | FEI1. Encodes a plasma membrane localized leucine-rich repeat receptor kinase that is involved in cell wall elongation.                                                                                                                                                           |
| AT1G58340 | ABS4, encodes a plant MATE transporter that is localized to the Golgi complex and small organelles and is involved in determining the rate of organ initiation.                                                                                                                   |
| AT2G35620 | FEI2. Encodes a plasma membrane localized leucine-rich repeat receptor kinase that is involved in cell wall elongation.                                                                                                                                                           |
| AT3G02540 | RAD23C. Encodes a member of the RADIATION SENSITIVE23 (RAD23) family, RAD23 proteins play an essential role in the cell cycle.                                                                                                                                                    |
| AT5G16750 | TOZ. Encodes a nucleolar localized WD-40 repeat protein that is preferentially expressed in dividing cells and is required for regulated division planes and embryo development.                                                                                                  |
| AT5G56270 | WRKY2. Encodes WRKY transcription factor 2, a zinc-finger protein. In wrky2 mutants, egg cells polarize normally but zygotes fail to reestablish polar organelle positioning from a transient symmetric state, resulting in equal cell division and distorted embryo development. |

**Supplemental Table 3. Primers used in this research.**

| Primers for real-time quantitative PCR (RT-qPCR)                  |                                                    |
|-------------------------------------------------------------------|----------------------------------------------------|
| Primer name                                                       | Primer sequences (5'-3')                           |
| <i>QPCR-GT-3a-F</i>                                               | GGAAGTCGTGGCTGCTAAGAT                              |
| <i>QPCR-GT-3a-R</i>                                               | GAATGGGAACTGCTGCCTAAT                              |
| <i>QPCR-RAD23C-F</i>                                              | CAGAACCCAACTTGATGCG                                |
| <i>QPCR-RAD23C-R</i>                                              | GCATTCGCGCCGCCATTT                                 |
| <i>QPCR-TOZ-F</i>                                                 | ATGGTTCTTTCATCGCCTGC                               |
| <i>QPCR-TOZ-R</i>                                                 | GACTCGCCTTCAATCGTGG                                |
| <i>QPCR-Mi2G02-F</i>                                              | ACGGCATCAACAATAACAACACC                            |
| <i>QPCR-Mi2G02-R</i>                                              | CACATTCGGTTGTCTCGGTTG                              |
| <i>GAPDH-F</i>                                                    | CGTGCAGCGGTTGAGAAGGA                               |
| <i>GAPDH-R</i>                                                    | GCGTCCGTGGGTGGAATCAT                               |
| Primers for vectors of luciferase complementation assay           |                                                    |
| Primer name                                                       | Primer sequences (5'-3')                           |
| <i>nluc-Mi2G02-F</i>                                              | acgggggacgagctcgggtaccATGGAATGTAGCGGAGATTGTTC      |
| <i>nluc-Mi2G02-R</i>                                              | cgcgtacgagatctgggtcgac CAATTTAGCATGAATCTTAAC       |
| <i>cluc-GT-3a-F</i>                                               | tacgctccccggggcggtaccATGGACCGACGTAACCCTTTC         |
| <i>cluc-GT-3a-R</i>                                               | acgaaagctctgcaggtcgacTCAGAAACCTTGATTATGATGATC      |
| Primers for vectors of subcellular localization assay             |                                                    |
| Primer name                                                       | Primer sequences (5'-3')                           |
| <i>Mi2G02-GFP-F</i>                                               | aatactagtggatccgggtaccATGGAATGTAGCGGAGATTGTTC      |
| <i>Mi2G02-GFP-R</i>                                               | gcccttgctcaccatgggtaccCAATTTAGCATGAATCTTAACTTTTCGG |
| <i>ShkT-GFP-F</i>                                                 | aatactagtggatccgggtaccATGGAATGTAGCGGAGATTGTTC      |
| <i>ShkT-GFP-R</i>                                                 | gcccttgctcaccatgggtaccATGACAACTTTACATTTCTTTGGA     |
| Primers for vectors of <i>Arabidopsis thaliana</i> transformation |                                                    |
| Primer name                                                       | Primer sequences (5'-3')                           |
| <i>GT-3a_super_F</i>                                              | aatactagtggatccgggtaccATGGACCGACGTAACCCTTTC        |
| <i>GT-3a_GFP_R</i>                                                | gcccttgctcaccatgggtaccGAAACCTTGATTATGATGATCATCATT  |
| <i>Mi2G02-HA-F</i>                                                | ctgcaggggccccgggtcgacATGGAATGTAGCGGAGATTGTTC       |
| <i>Mi2G02-HA-R</i>                                                | aacatcgatgggtagggtaccCAATTTAGCATGAATCTTAACTTTTCGG  |
| Primers for identifying transgenic <i>Arabidopsis thaliana</i>    |                                                    |
| Primer name                                                       | Primer sequences (5'-3')                           |
| <i>GFP-F</i>                                                      | ATGGTGAGCAAGGGCGAG                                 |
| <i>GFP-R</i>                                                      | ACTTGTACAGCTCGTCCATGC                              |
| <i>Mi2G02-F</i>                                                   | ATGGAATGTAGCGGAGATTGTTCT                           |
| <i>Mi2G02-HA-R</i>                                                | TCAAGCGTAATCTGGAACATCGT                            |
| <i>GT-3a-F</i>                                                    | ATGGACCGACGTAACCCTTTC                              |
| <i>GT-3a-R</i>                                                    | CCTATTAAGCAAAGCATCGATGAGAG                         |

|                                                                 |                                                |
|-----------------------------------------------------------------|------------------------------------------------|
| <i>GT-3a-F</i>                                                  | ATGGACCGACGTAACCCTTTC                          |
| <i>GFP-R</i>                                                    | ACTTGTACAGCTCGTCCATGC                          |
| Primers for identifying T-DNA knockout mutant of <i>gt-3a</i>   |                                                |
| Primer name                                                     | Primer sequences (5'-3')                       |
| <i>SALK_134703_LP</i>                                           | TTCACCGTTTGCCTCATAAAC                          |
| <i>SALK_134703_RP</i>                                           | GAAGTCGTGGCTGCTAAGATG                          |
| <i>SALK_040448_LP</i>                                           | TTCACCGTTTGCCTCATAAAC                          |
| <i>SALK_040448_RP</i>                                           | GAAGTCGTGGCTGCTAAGATG                          |
| <i>LBb1.3</i>                                                   | ATTTTGCCGATTTGCGAAC                            |
| Primers for constructing GUS vector                             |                                                |
| Primer name                                                     | Primer sequences (5'-3')                       |
| <i>PBI101-GT-3a-F</i>                                           | cttgcctgcctgcaggtgcacGATGGGAAATAAAAAGGATGATGAG |
| <i>PBI101-GT-3a-R</i>                                           | ggactgaccaccggggatccTATTTGGAATCGAATTGTCTTTGTG  |
| Primers for constructing prokaryotic expression vector          |                                                |
| Primer name                                                     | Primer sequences (5'-3')                       |
| <i>PET30a-GT-3a-F</i>                                           | gccatggctgatatcgatccATGGACCGACGTAACCCTTTC      |
| <i>PET30a-GT-3a-R</i>                                           | tgcggccgaagcttgcacGAAACCTTGATTATGATGATCATCATT  |
| Primers for identifying T-DNA knockout mutant of <i>rad23c</i>  |                                                |
| Primer name                                                     | Primer sequences (5'-3')                       |
| <i>SALK_068091-LP</i>                                           | ATTTTCGTACCGTCATGCAAC                          |
| <i>SALK_068091-RP</i>                                           | GCAGCCAACTCTTCATTCTTG                          |
| <i>LBb1.3</i>                                                   | ATTTTGCCGATTTGCGAAC                            |
| Primers for identifying gene expression using cDNA              |                                                |
| Primer name                                                     | Primer sequences (5'-3')                       |
| <i>GT-3a-CDS-F</i>                                              | ATGGACCGACGTAACCCTTTC                          |
| <i>GT-3a-CDS-R</i>                                              | TTAGAAACCTTGATTATGATGATCATCA                   |
| <i>Mi2G02-CDS-F</i>                                             | ATGGAATGTAGCGGAGATTGTTC                        |
| <i>Mi2G02-CDS-R</i>                                             | TTACAATTTAGCATGAATCTTAACTTTTCG                 |
| <i>Mi2G02-CDS-F</i>                                             | ATGGAATGTAGCGGAGATTGTTC                        |
| <i>Mi2G02-CDS-R</i>                                             | TTACAATTTAGCATGAATCTTAACTTTTCG                 |
| Primers for constructing pSAT5 vector (host-derived RNAi)       |                                                |
| Primer name                                                     | Primer sequences (5'-3')                       |
| <i>Mi2G02-F1-NcoI-XbaI</i>                                      | CATGCCATGGTCTAGACTTATTCAACCGAGACAACCGA         |
| <i>Mi2G02-F1-XhoI</i>                                           | CCGCTCGAGTCATCTTCTTTGCGTCTTTGAA                |
| <i>Mi2G02-F2-PstI</i>                                           | AACTGCAGTCATCTTCTTTGCGTCTTTGAA                 |
| <i>Mi2G02-F2-KpnI</i>                                           | GGGGTACCCTTATTCAACCGAGACAACCGA                 |
| Primers for vectors of bimolecular fluorescence complementation |                                                |
| Primer name                                                     | Primer sequence (5'-3')                        |
| <i>Mi2G02-CE-SalI</i>                                           | ACGCGTCGAC ATGGAATGTAGCGGAGATTGTTC             |
| <i>Mi2G02-CE-XmaI</i>                                           | TCCCCCGGGCAATTTAGCATGAATCTTAAAC                |

|                                                |                                                      |
|------------------------------------------------|------------------------------------------------------|
| AT3G02550-CE-SalF                              | ACGCGTCGAC ATGCGGATGAGCTGTAATGG                      |
| AT3G02550-CE-XmaR                              | TCCCCCGGG GAGCATAAGCTCAGTCTTAC                       |
| AT3G52590-CE-SalF                              | ACGCGTCGAC ATGCAGATCTTCGTGAAAAC                      |
| AT3G52590-CE-XmaR                              | TCCCCCGGG CTTGATCTTCTTCTTAGGCC                       |
| GT-3a-CE-SalF                                  | ACGCGTCGAC ATGGACCGACGTAACCCTTTC                     |
| GT-3a-CE-XmaR                                  | TCCCCCGGG GAAACCTTGATTATGATGATC                      |
| Primers for vectors of yeast two-hybrid assays |                                                      |
| Primer name                                    | Primer sequence (5'-3')                              |
| <i>AD-52590-F</i>                              | gccatggaggccagtgaaattcATGCAGATCTTCGTGAAAACCTT        |
| <i>AD-52590-R</i>                              | cagctcgagctcgatggatccCTACTTGATCTTCTTCTTAGGCCTCA      |
| <i>AD-Mi2G02-F</i>                             | gccatggaggccagtgaaattcATGGAATGTAGCGGAGATTGTTT        |
| <i>AD-Mi2G02-R</i>                             | cagctcgagctcgatggatccTTACAATTTAGCATGAATCTTAACTTTTCG  |
| <i>AD-ShKT-F</i>                               | gccatggaggccagtgaaattcATGTATAAATGTGAGGATAGAAGTGAATTT |
| <i>AD-ΔShKT-F</i>                              | gccatggaggccagtgaaattcATGCATAGTTCTGGTGAAGAACCTAA     |
| <i>AD-ShKT-R</i>                               | cagctcgagctcgatggatccTTAATGACAAACTTTACATTTCTTTGGA    |
| <i>AD-02550-F</i>                              | gccatggaggccagtgaaattcATGCGGATGAGCTGTAATGGA          |
| <i>AD-02550-R</i>                              | cagctcgagctcgatggatccTTAGAGCATAAGCTCAGTCTTACACG      |
| <i>AD-GT-3a-F</i>                              | gccatggaggccagtgaaattcATGGACCGACGTAACCCTTTC          |
| <i>AD-GT-3a-R</i>                              | cagctcgagctcgatggatccTTAGAAACCTTGATTATGATGATCATCA    |
| <i>AD-GT-3a-DB-F</i>                           | gccatggaggccagtgaaattcATGCCACAGTGGAGCATAGAGG         |
| <i>AD-GT-3a-DB-R</i>                           | cagctcgagctcgatggatccTTAAATCGACTGAATCTCATTGTAGAAT    |
| <i>AD-GT-3a-ΔDB-F</i>                          | gccatggaggccagtgaaattcATGTTTGAAGCAAGAATGCAAAGA       |
| <i>Mi2G02-BDF</i>                              | atggccatggaggccgaattcGAATGTAGCGGAGATTGTTCTATAGAG     |
| <i>Mi2G02-BDR</i>                              | ccgctgcaggtcgacggatccTTACAATTTAGCATGAATCTTAACTTTTCG  |
| <i>BD-GT-3a-F</i>                              | atggccatggaggccgaattcATGGACCGACGTAACCCTTTC           |
| <i>BD-GT-3a-R</i>                              | ccgctgcaggtcgacggatccTTAGAAACCTTGATTATGATGATCATCA    |
| <i>BD-GT-3a-DB-F</i>                           | atggccatggaggccgaattcATGCCACAGTGGAGCATAGAGG          |
| <i>BD-GT-3a-DB-R</i>                           | ccgctgcaggtcgacggatccTTAAATCGACTGAATCTCATTGTAGAAT    |
| <i>BD-GT-3a-ΔDB-F</i>                          | atggccatggaggccgaattcATGTTTGAAGCAAGAATGCAAAGA        |
| Primers for vectors of yeast one-hybrid assays |                                                      |
| Primer name                                    | Primer sequence (5'-3')                              |
| <i>PLaczi-SRP34-F</i>                          | ATCTGTGACCTCGAGGAACCTATCTAACAACAAGCC                 |
| <i>PLaczi-SRP34-R</i>                          | GAGCACATGCCTCGAGGTCCAAAGTCAAGATTCAAAC                |
| <i>PLaczi-DVL4-F</i>                           | ATCTGTGACCTCGAGGTAATGAGAGACTTGCAACTTC                |
| <i>PLaczi-DVL4-R</i>                           | GAGCACATGCCTCGAGGAGGATACAAAGAAGAAGAGAG               |
| <i>PLaczi-SKP2-F</i>                           | ATCTGTGACCTCGAGCAAGTCATTTTGGCTTGAAT                  |
| <i>PLaczi-SKP2-R</i>                           | GAGCACATGCCTCGAGTGAAGTGTTCACAGAGCTAG                 |
| <i>PLaczi-FE11-F</i>                           | ATCTGTGACCTCGAGGATTAGGCTTAGCTAAGGTCT                 |
| <i>PLaczi-FE11-R</i>                           | GAGCACATGCCTCGAGGAAGAAGATGACTAATTTGAGC               |
| <i>PLaczi-ABS4-F</i>                           | ATCTGTGACCTCGAGCTTCTCACAGACTTATTTGGTG                |

|                        |                                            |
|------------------------|--------------------------------------------|
| <i>PLaczi-ABS4-R</i>   | GAGCACATGCCTCGAGGATTCTTAAGAGGAGTAAACTGG    |
| <i>PLaczi-FEI2-F</i>   | ATCTGTCGACCTCGAGCGCAATAACGATGTTTTAACT      |
| <i>PLaczi-FEI2-R</i>   | GAGCACATGCCTCGAGTGAAGAATAAGACAGAGGAAG      |
| <i>PLaczi-RAD23C-F</i> | ATCTGTCGACCTCGAGCCTATCTGCTATCATTTAATAAGTG  |
| <i>PLaczi-RAD23C-R</i> | GAGCACATGCCTCGAGCTCACCGTCGAAATTCTCTTC      |
| <i>PLaczi-TOZ-F</i>    | ATCTGTCGACCTCGAGGAGATCATACAGAATCGAGATTC    |
| <i>PLaczi-TOZ-R</i>    | GAGCACATGCCTCGAGCATGAACTATATAATTGGCCCA     |
| <i>PLaczi-WRKY2-F</i>  | ATCTGTCGACCTCGAGGTTAGAGATCACCTGTGTTAC      |
| <i>PLaczi-WRKY2-R</i>  | GAGCACATGCCTCGAGGAGAAGAGGAATCTTCGAAAG      |
| <i>pB42AD-01380-F</i>  | TGCCTCTCCCGAATTCATGGACCGACGTAACCC          |
| <i>pB42AD-01380-R</i>  | CGAGTCGGCCGAATTCTAGAAACCTTGATTATGATGATCATC |
