# Supplementary material for: The root-knot nematode effector Mi2G02 hijacks a host plant trihelix transcription factor to promote nematode parasitism
Source: PubMed Central journal article supplement — Plant Commun. 2023 Sep 22;5(2):100723. doi: 10.1016/j.xplc.2023.100723 (PMC10873892; doi:10.1016/j.xplc.2023.100723), 2023-09-22
Supplement: mmc2.pdf [file mmc2.pdf]

# The root-knot nematode effector Mi2G02 hijacks a host plant trihelix transcription factor to promote nematode parasitism

Jianlong Zhao<sup>1,4,\*</sup>, Kaiwei Huang<sup>1,4</sup>, Rui Liu<sup>1,4</sup>, Yuqing Lai<sup>1</sup>, Pierre Abad<sup>2</sup>, Bruno Favery<sup>2</sup>, Heng Jian<sup>3</sup>, Jian Ling<sup>1</sup>, Yan Li<sup>1</sup>, Yuhong Yang<sup>1</sup>, Bingyan Xie<sup>1</sup>, Michaël Quentin<sup>2,\*</sup> and Zhenchuan Mao<sup>1,\*</sup>

<sup>1</sup>State Key Laboratory of Vegetable Biobreeding, Institute of Vegetables and Flowers, Chinese Academy of Agricultural Sciences, Beijing 100081, China

<sup>2</sup>INRAE, Université Côte d'Azur, CNRS, ISA, 06903 Sophia Antipolis, France

<sup>3</sup>Department of Plant Pathology and Key Laboratory of Pest Monitoring and Green Management of the Ministry of Agriculture, China Agricultural University, Beijing 100193, China

<sup>4</sup>These authors contributed equally to this article.

\*Correspondence: Jianlong Zhao ([zhaojianlong@caas.cn](mailto:zhaojianlong@caas.cn)), Michaël Quentin ([michael.quentin@inrae.fr](mailto:michael.quentin@inrae.fr)), Zhenchuan Mao ([maozhenchuan@caas.cn](mailto:maozhenchuan@caas.cn))

<https://doi.org/10.1016/j.xplc.2023.100723>

## ABSTRACT

Root-knot nematodes (RKNs) cause huge agricultural losses every year. They secrete a repertoire of effectors to facilitate parasitism through the induction of plant-derived giant feeding cells, which serve as their sole source of nutrients. However, the mode of action of these effectors and their targeted host proteins remain largely unknown. In this study, we investigated the role of the effector Mi2G02 in *Meloidogyne incognita* parasitism. Host-derived *Mi2G02* RNA interference in *Arabidopsis thaliana* affected giant cell development, whereas ectopic expression of *Mi2G02* promoted root growth and increased plant susceptibility to *M. incognita*. We used various combinations of approaches to study the specific interactions between *Mi2G02* and *A. thaliana* GT-3a, a trihelix transcription factor. *GT-3a* knockout in *A. thaliana* affected feeding-site development, resulting in production of fewer egg masses, whereas *GT-3a* overexpression in *A. thaliana* increased susceptibility to *M. incognita* and also root growth. Moreover, we demonstrated that *Mi2G02* plays a role in maintaining *GT-3a* protein stabilization by inhibiting the 26S proteasome-dependent pathway, leading to suppression of *TOZ* and *RAD23C* expression and thus promoting nematode parasitism. This work enhances our understanding of how a pathogen effector manipulates the role and regulation of a transcription factor by interfering with a proteolysis pathway to reprogram gene expression for development of nematode feeding cells.

**Key words:** *Meloidogyne incognita*, effector, giant cell, *Mi2G02*, transcription factor, interaction

**Zhao J., Huang K., Liu R., Lai Y., Abad P., Favery B., Jian H., Ling J., Li Y., Yang Y., Xie B., Quentin M., and Mao Z. (2024).** The root-knot nematode effector *Mi2G02* hijacks a host plant trihelix transcription factor to promote nematode parasitism. *Plant Comm.* **5**, 100723.

## INTRODUCTION

Root-knot nematodes (RKNs; *Meloidogyne* spp.) can infect thousands of plant species, causing huge agricultural losses every year (Abad et al., 2008; Jones et al., 2013). RKN juveniles induce the redifferentiation of plant vascular cells to establish feeding structures that support their development into reproductive adult females (Bartlem et al., 2014). The second-stage juveniles (J2s) enter the host in the root elongation area and migrate intercellularly toward the vascular tissues, where they select 5–7 parenchyma cells into which they inject esophageal gland secretions through a syringe-like stylet (Favery et al., 2020).

These secretions contain proteinaceous effectors that reprogram the root cells to become giant cells (GCs), hypertrophied multinucleate feeding cells that undergo several rounds of nuclear division without cell division and extensive endoreduplication, with expansion by isotropic growth (Caillaud et al., 2008). The cells surrounding the GCs simultaneously divide to form a typical root knot or gall. The vascular tissues

Published by the Plant Communications Shanghai Editorial Office in association with Cell Press, an imprint of Elsevier Inc., on behalf of CSPB and CEMPS, CAS.

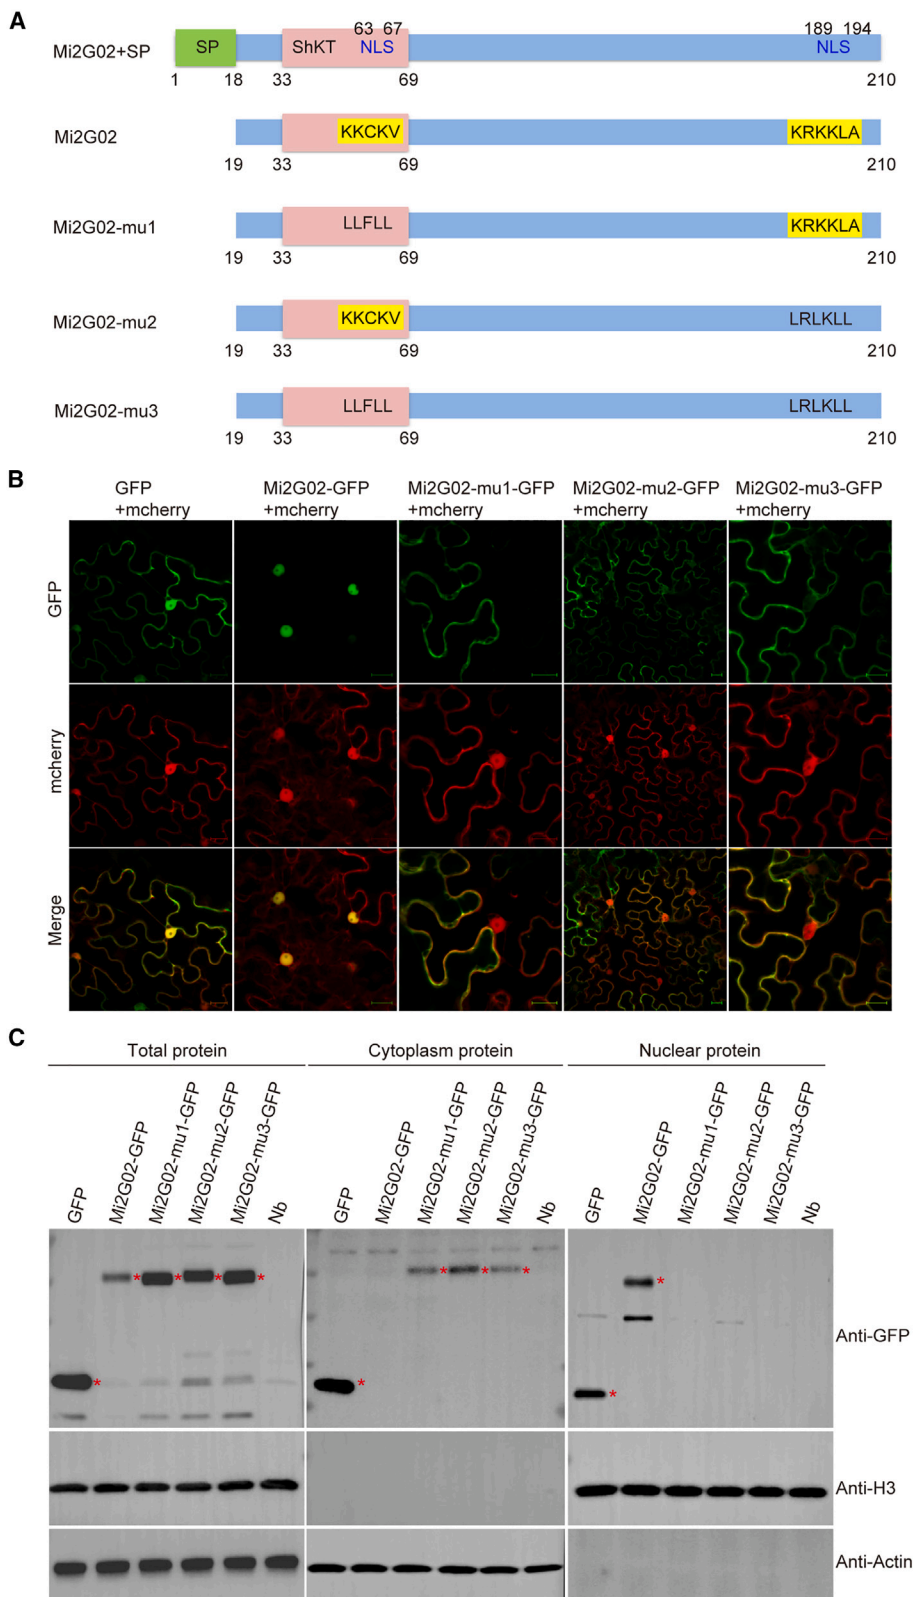

**Figure 1. Structure and nuclear localization of the *M. incognita* effector Mi2G02.**

**(A)** Schematic diagram of Mi2G02 and mutant Mi2G02 proteins.

**(B)** Subcellular localization of Mi2G02 and mutant Mi2G02 in plant cells. Coding sequences were ligated into the *ProSuper*:GFP vector (C-terminal GFP). Mi2G02 and nuclear localization signal mutants fused with GFP (Mi2G02-GFP, Mi2G02-mu1-GFP, Mi2G02-mu2-GFP, and Mi2G02-mu3-GFP) were

(legend continued on next page)

undergo extensive reorganization, and the xylem proliferates (Bartlem et al., 2014; Yamaguchi et al., 2017; Baldacci-Cresp et al., 2020). GCs are the only source of nutrients for RKNs throughout their life cycle; the nematode must therefore maintain this parasitic interaction for several weeks until the female can lay her eggs in a gelatinous matrix on the outside of the root tissues (Favery et al., 2020).

This intricate biotrophic interaction requires the nematode to cope with host defense responses, alter host cell morphology, and hijack the physiology of host cells for its own benefit. The nematode achieves these ends by inducing a deep transcriptional reprogramming of host cells, as demonstrated by a large number of transcriptomic studies (Jammes et al., 2005; Fuller et al., 2007; Portillo et al., 2009; Barcala et al., 2010; Escobar et al., 2011; Cabrera et al., 2014a; Olmo et al., 2017; Yamaguchi et al., 2017; Shukla et al., 2018; Warmerdam et al., 2018; Przybylska and Szychalski, 2021; Sato et al., 2021; Zhu et al., 2022). Genes encoding transcription factors (TFs), which regulate gene expression by binding to appropriate DNA elements and recruiting additional proteins to initiate transcription (Strader et al., 2022), are among the genes known to display differential expression in galls (Cabrera et al., 2014a; Yamaguchi et al., 2017; Przybylska and Szychalski, 2021; Zhu et al., 2022). Many of these plant TFs are known to be key players in the regulation of plant developmental processes and stress responses. They include ETHYLENE-RESPONSIVE FACTORS (ERFs), NO APICAL MERISTEM (NAC), AUXIN RESPONSE FACTORS (ARFs), and LATERAL ORGAN BOUNDARIES DOMAIN (LBD) (Shukla et al., 2018). However, very little is known about the roles of these TFs in GC formation and RKN parasitism. For LBD16, inactivation led to a decrease in infection or even a total absence of feeding-site formation (Cabrera et al., 2014b; Olmo et al., 2017).

RKN effectors are clearly involved in modulating host transcriptional responses. They may act as TFs, as has been shown for the *Meloidogyne incognita* effector 7H08, which localizes to the plant cell nucleus and functions as a transcriptional activator (Zhang et al., 2015). Other effectors may associate with and dysregulate host TFs. Mi16D10 may be one such effector, as it has been shown to interact with plant SCARECROW-like TFs known to regulate root development (Huang et al., 2006). Another example is provided by MiEFF18, an effector that interacts with the spliceosomal protein SmD1 to trigger alternative splicing events during pre-mRNA maturation in galls, thereby increasing the diversity of host transcripts (Mejias et al., 2021, 2022).

*M. incognita* secreted protein 2 (*Mi-msp2* or *Mi2G02*) was initially identified as a putative parasitism gene expressed exclusively in the subventral esophageal gland cells of parasitic J2s (Huang et al., 2003). It was subsequently shown to be required for *M. incognita* parasitism in host-derived RNA interference experiments (Joshi et al., 2019, 2022). *Mj2G02*, an ortholog from

*Meloidogyne javanica*, has been shown to suppress Gpa2/RBP-1-triggered cell death in *Nicotiana benthamiana* and jasmonate-mediated plant immune responses (Song et al., 2021). 2G02 proteins are nuclear effectors; they have a ShK toxin (ShKT) domain encoding a potassium-channel inhibitor first identified in a sea anemone (*Stichodactyla helianthus*) (Tudor et al., 1996). Proteins containing ShKT domains are widely expressed in parasitic and non-parasitic nematodes (Hewitson et al., 2013). There is evidence to suggest that ShKT-like domains act as contact surfaces for protein interactions (Thein et al., 2009) and immune evasion (Chhabra et al., 2014; Niu et al., 2016; Song et al., 2021). However, the plant proteins targeted by Mi2G02 are unknown.

In this study, we show that the Mi2G02 effector interacts with the *Arabidopsis thaliana* trihelix TF GT-3a and that this interaction is important for nematode parasitism. We also demonstrate that GT-3a functions as a transcription inhibitor, binding to the promoters of *TOZ* and *RAD23C* and thereby modulating plant cell development for *M. incognita* parasitism. We found that Mi2G02 stabilized GT-3a by inhibiting the 26S proteasome-dependent pathway, thereby causing stronger suppression of *TOZ* and *RAD23C* expression. Collectively, these results demonstrate the involvement of a *M. incognita* effector (Mi2G02), a plant TF (GT-3a), and downstream regulatory genes in the formation and development of multinucleate GCs for nematode parasitism.

## RESULTS

### Mi2G02 is a nematode nuclear effector essential for giant cell development

The *Mi2G02/MIMSP2* gene encodes a 210-amino-acid (aa) protein with an 18-aa N-terminal signal peptide, a ShKT domain (33–69 aa), and two nuclear localization signals (NLS-1 and NLS-2), one of which is located in the ShKT domain (Figure 1A). Transient expression assays were performed in *N. benthamiana* leaves to investigate the functionality of the NLSs *in planta*. Mi2G02-GFP recombinant fusion proteins were detected exclusively in the plant cell nucleus and exclusively in the nucleoplasm but were excluded from the nucleolus (Figure 1B). We mutated the two predicted nuclear localization signals in the effector sequence to generate Mi2G02-mu1 (mutated NLS-1), Mi2G02-mu2 (mutated NLS-2), and Mi2G02-mu3 (mutated NLS-1 and NLS-2) (Figure 1A). Mi2G02-mu1-GFP, Mi2G02-mu2-GFP, and Mi2G02-mu3-GFP were found principally in the cytoplasm (Figure 1B). Immunoblotting of cytoplasmic- and nuclear-fraction proteins extracted from *N. benthamiana* leaves confirmed the nuclear expression of Mi2G02-GFP but not Mi2G02-mu1-GFP, Mi2G02-mu2-GFP, and Mi2G02-mu3-GFP (Figure 1C). These results demonstrated that both NLSs were required for localization of Mi2G02 to the nucleus.

We investigated the role of Mi2G02 in giant cell formation by generating three homozygous RNAi *A. thaliana* lines expressing

co-expressed with mCherry in *N. benthamiana* leaf cells. Empty vectors were used as controls. The fluorescence signal was detected at 48 h after infiltration. Mi2G02-GFP localized to the nucleus. Mi2G02-mu1-GFP, Mi2G02-mu2-GFP, and Mi2G02-mu3-GFP localized primarily to the plasma membrane and cytoplasm. Images were captured by confocal microscopy (Zeiss LSM 700). GFP, green fluorescent protein. Scale bars, 20  $\mu$ m. (C) The relative abundance of Mi2G02-GFP or Mi2G02-mu-GFP in cytoplasmic and nuclear fractions was detected using anti-GFP antibodies after transient expression in *N. benthamiana* leaf cells. Actin was used as an internal reference for the presence of cytoplasmic proteins, and histone H3 was used as an internal reference for the presence of nuclear proteins.

## Plant Communications

the *Mi2G02* hairpin double-stranded RNA. Expression of the hairpin construct in these RNAi lines was confirmed by PCR (Supplemental Figure 1A), and the transgenic plants were inoculated with nematodes. Silencing of *Mi2G02* by host-derived RNAi was confirmed by quantitative reverse transcription-PCR (qRT-PCR) assays of feeding nematodes recovered from the infested plants (Figure 2A and Supplemental Figure 1B). Consistent with previous findings (Joshi et al., 2019), *Mi2G02* silencing decreased the numbers of galls and egg masses by at least 60% in the *Mi2G02* RNAi lines relative to the two control lines: wild-type plants and a *GFP* RNAi line (Figure 2B and Supplemental Figure 1B). We further investigated the role of *Mi2G02* in formation of RKN-induced feeding sites by analyzing the morphology of the feeding cells induced in the RNAi lines. All three *Mi2G02* RNAi lines showed significantly smaller (30%) GC areas than the controls (Figure 2C). These findings suggest that *Mi2G02* plays a role in nematode parasitism, particularly in the development of GCs.

We next generated two transgenic *A. thaliana* lines with ectopic *Mi2G02* expression. Semiquantitative RT-PCR (Supplemental Figure 2A) and western blotting (Supplemental Figure 2B) were performed to confirm the expression of *Mi2G02* in the transgenic plants. Interestingly, roots of the two independent *Mi2G02*-expressing transgenic lines were 27% and 33% longer ( $n = 10$ ) than those of wild-type plants (Figure 2D and Supplemental Figure 3C). In nematode inoculation assays, both transgenic lines were significantly ( $P < 0.05$ ) more susceptible to *M. incognita* infection than wild-type plants; the *Mi2G02*-expressing lines had up to 30% more galls and egg masses than the wild-type plants at 35 days post inoculation (dpi) (Figure 2E and Supplemental Figure 2D). *Mi2G02* is therefore an effector essential for *M. incognita* parasitism and is able to modulate root growth.

### **Mi2G02 interacts with the trihelix transcription factor GT-3a**

We used a yeast two-hybrid (Y2H) screen to identify *A. thaliana* proteins targeted by *Mi2G02*. We used a signal peptide-deficient *Mi2G02* as a bait to screen a cDNA library from *M. incognita*-infected *A. thaliana* roots. We identified 20 candidate target proteins, including six annotated as predicted nuclear proteins in The Arabidopsis Information Resource (Supplemental Table 1). On the basis of the number of captures and their predicted subcellular distributions and functions, we selected three candidate targets for further study: a trihelix TF (GT-3a, AT5G01380), LATERAL ORGAN BOUNDARIES DOMAIN PROTEIN 41 (LBD41, AT3G020550), and UBIQUITIN EXTENSION PROTEIN 1 (UBQ1, AT3G52990). A pairwise Y2H assay was performed to validate the interactions between *Mi2G02* and the full-length GT-3a, LBD41, and UBQ1 proteins. GT-3a was the only protein found to interact with *Mi2G02* (Figure 3A and 3B). LBD41 displayed strong autoactivation in yeast, and it was not possible to confirm any interaction between *Mi2G02* and UBQ1 (Supplemental Figure 3A).

We investigated the possible involvement of the ShKT domain of *Mi2G02* and the DNA-binding domain (DB) of GT-3a in their interaction by generating two truncated versions of *Mi2G02* (*Mi2G02*-ShKT and *Mi2G02*- $\Delta$ ShKT) and two truncated versions of GT-3a (GT-3a-DB and GT-3a- $\Delta$ DB) (Figure 3A). Subcellular localization results showed that *Mi2G02*-ShKT-GFP was local-

### **Role of RKN effector *Mi2G02* in nematode parasitism**

ized mainly in the cell nucleus (Supplemental Figure 3B). Pairwise Y2H experiments demonstrated that the ShKT domain of *Mi2G02* and the DB domain of GT-3a were required for the interaction between these two proteins (Figure 3B). We also investigated whether the NLSs of *Mi2G02* were required for its interaction with GT-3a in yeast. Pairwise Y2H experiments with *Mi2G02*-mu1, *Mi2G02*-mu2, and *Mi2G02*-mu3 showed that both NLSs of *Mi2G02* were required for interaction with GT-3a (Figure 3C).

Co-expression of *Mi2G02*-GFP and mCherry-GT-3a in *N. benthamiana* leaf cells showed that the effector and its target were co-localized in the nucleoplasm of plant cells (Figure 3D). We then investigated the interactions between *Mi2G02* and GT-3a *in planta* by performing bimolecular fluorescence complementation (BiFC) assays. Co-expression of *Mi2G02* fused to the N-terminal part of YFP (*Mi2G02*-nEYFP) and GT-3a fused to the C-terminal part of YFP (GT-3a-cEYFP) in *N. benthamiana* leaf epidermal cells reconstituted YFP activity in the nucleus, whereas no YFP fluorescence was observed if *Mi2G02* with mutated NLSs or an empty vector was used (Figure 3E and Supplemental Figure 3C).

A split luciferase complementation assay (LCA) and a co-immunoprecipitation (co-IP) assay were performed to further verify the interaction between *Mi2G02* and GT-3a *in planta*. A positive luciferase signal was obtained when *Mi2G02* was co-expressed with GT-3a in *N. benthamiana* leaves, as luciferase activity was reconstituted by the interaction between *Mi2G02* and GT-3a, but no luciferase signal was observed if *Mi2G02* with mutated NLSs or the  $\beta$ -glucuronidase (GUS) control was used (Figure 3F). In the co-IP assay, *Mi2G02*-HA, the HA empty vector, or GFP-HA was co-expressed with GT-3a-GFP in *N. benthamiana* leaves. GT-3a-GFP co-precipitated with *Mi2G02*-HA but not with *Mi2G02*-mu1-HA, *Mi2G02*-mu2-HA, or *Mi2G02*-mu3-HA (Figure 3G). There is therefore a direct interaction between nuclear *Mi2G02* and the *A. thaliana* GT-3a TF *in planta*.

### **GT-3a is important for *M. incognita* parasitism**

GT-3a has been reported to be predominantly expressed in floral buds and roots, especially at the onset of secondary root development (Ayadi et al., 2004). RNA-sequencing data for *M. incognita*-infected *A. thaliana* galls at 3, 5, and 7 dpi and for non-infected roots showed that *GT-3a* was significantly upregulated by nematode infection at these early time points (Yamaguchi et al., 2017). For analysis of *GT-3a* expression in galls, we cloned a fragment of the *GT-3a* promoter (−2023 to 0) and transformed *A. thaliana* plants with a *ProGT-3a:GUS* fusion. We then inoculated the transformed plants with *M. incognita* and performed histochemical assays. We observed a strong GUS signal in uninfected root vascular tissues and lateral root initials and in developing galls at 3, 5, and 7 dpi (Figure 4A). These results suggest that *GT-3a* plays a role early in nematode feeding-site development.

We explored the biological functions of GT-3a during gall formation in two *gt-3a* T-DNA knockout (KO) mutant *A. thaliana* lines (SALK\_134703 and SALK\_040448) (Supplemental Figure 4A). We also generated transgenic *A. thaliana* lines overexpressing a *GT-3a*-GFP fusion and GFP alone. Homozygous KO mutants were verified by PCR and semiquantitative RT-PCR



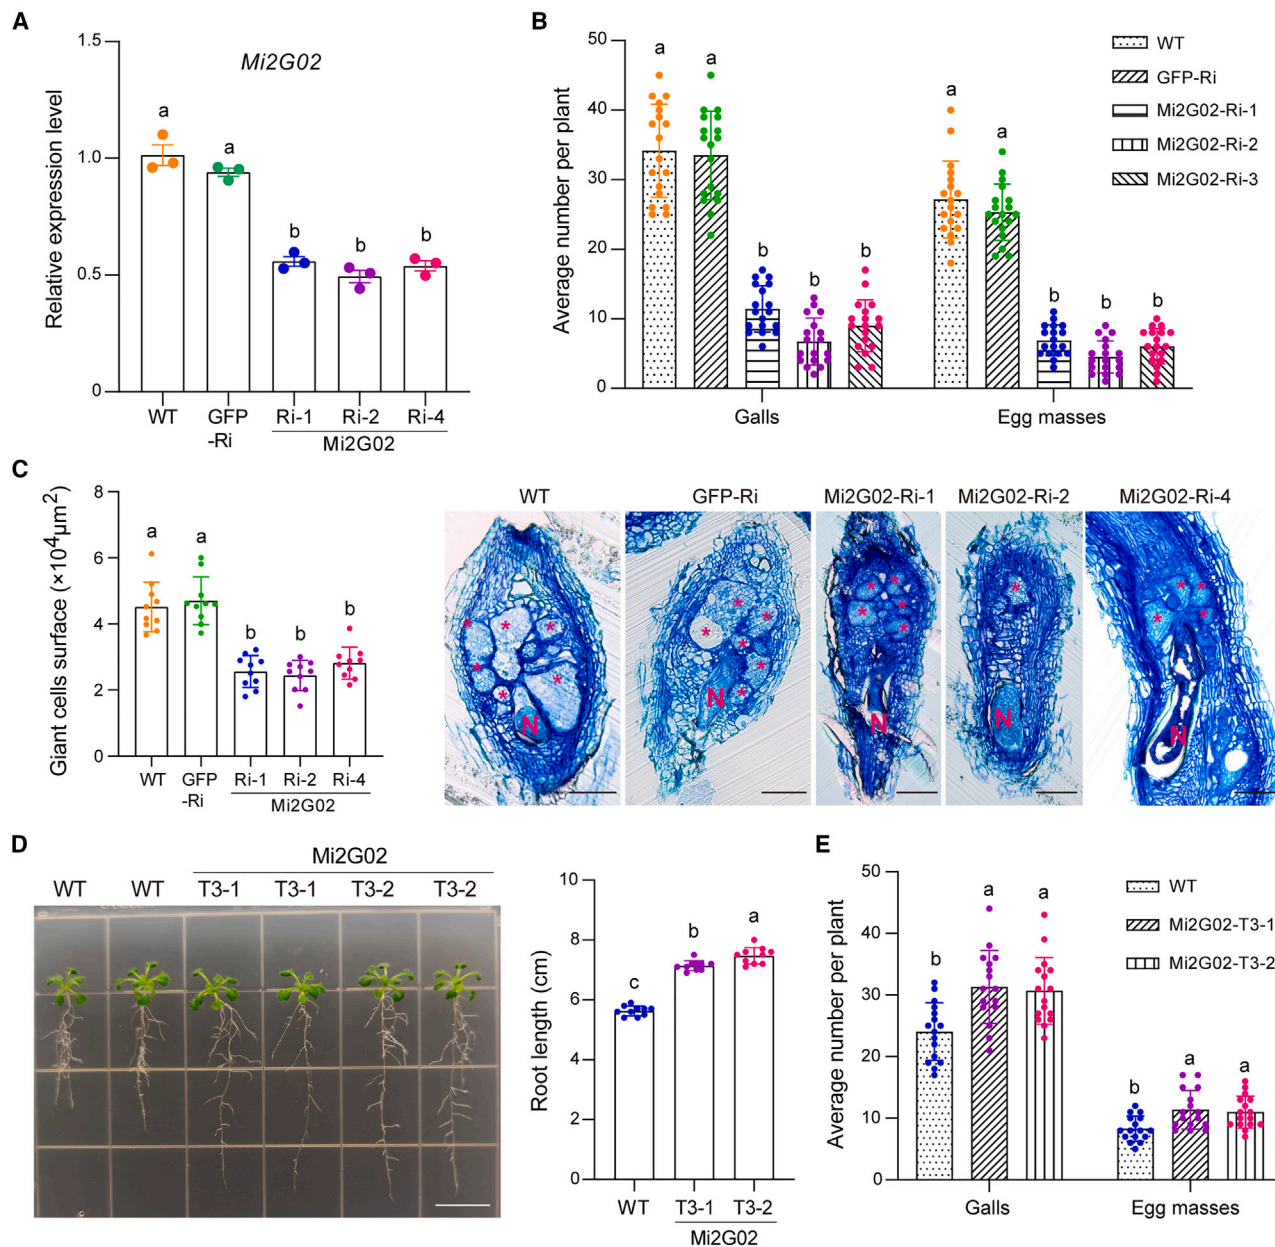

**Figure 2. Host-derived RNA interference and ectopic expression of *Mi2G02* in *A. thaliana* alter plant susceptibility to *M. incognita* and root development.**

**(A)** *Mi2G02* expression level in three homozygous RNAi lines (*Mi2G02*-Ri-1, *Mi2G02*-Ri-2, and *Mi2G02*-Ri-4), a *gfp*-RNAi line (*GFP*-Ri), and the wild type (*WT*) were determined at 10 days post infection (dpi) with *M. incognita* by qRT-PCR. *GAPDH* was used as an internal control. The values shown are means  $\pm$  SE ( $n = 3$ ). Different letters indicate significant differences ( $P < 0.05$ , one-way ANOVA).

**(B)** Gall numbers and egg mass numbers per plant at 35 dpi. Values are presented as means  $\pm$  SD ( $n = 18$ ). Different letters indicate significant differences ( $P < 0.05$ , one-way ANOVA). See also Supplemental Figure 1B.

**(C)** Giant cell areas of *M. incognita*-induced galls were significantly reduced in the *A. thaliana* *Mi2G02*-Ri lines. Gall sections at 14 dpi were stained with toluidine blue. Smaller giant cells were observed in *Mi2G02*-Ri mature galls at 14 dpi compared with the *WT* and *GFP*-Ri controls. Data are the average surface areas  $\pm$ SD ( $n = 10$ ) for each line. Different letters indicate significant differences ( $P < 0.05$ , one-way ANOVA). Asterisk, giant cell; N, nematode. Scale bars, 100  $\mu$ m.

**(D)** *A. thaliana* phenotypes and relative root lengths of *A. thaliana* lines ectopically expressing *Mi2G02* compared with the wild type (*WT*). Data represent the average length  $\pm$  SD ( $n = 10$ ). Different letters indicate significant differences ( $P < 0.05$ , one-way ANOVA). Scale bar, 1 cm. See also Supplemental Figure 2C.

**(E)** Expression of *Mi2G02* in *A. thaliana* increased susceptibility to *M. incognita*. Two independent *Mi2G02*-T3 lines were inoculated with *M. incognita* pre-J2s. Total numbers of galls and egg masses were counted at 35 dpi. *M. incognita* inoculated *WT A. thaliana* inoculated with *M. incognita* was used as a control. Data are the average number per plant  $\pm$  SD ( $n = 16$ ). Different letters indicate significant differences ( $P < 0.05$ , one-way ANOVA). See also Supplemental Figure 2D.

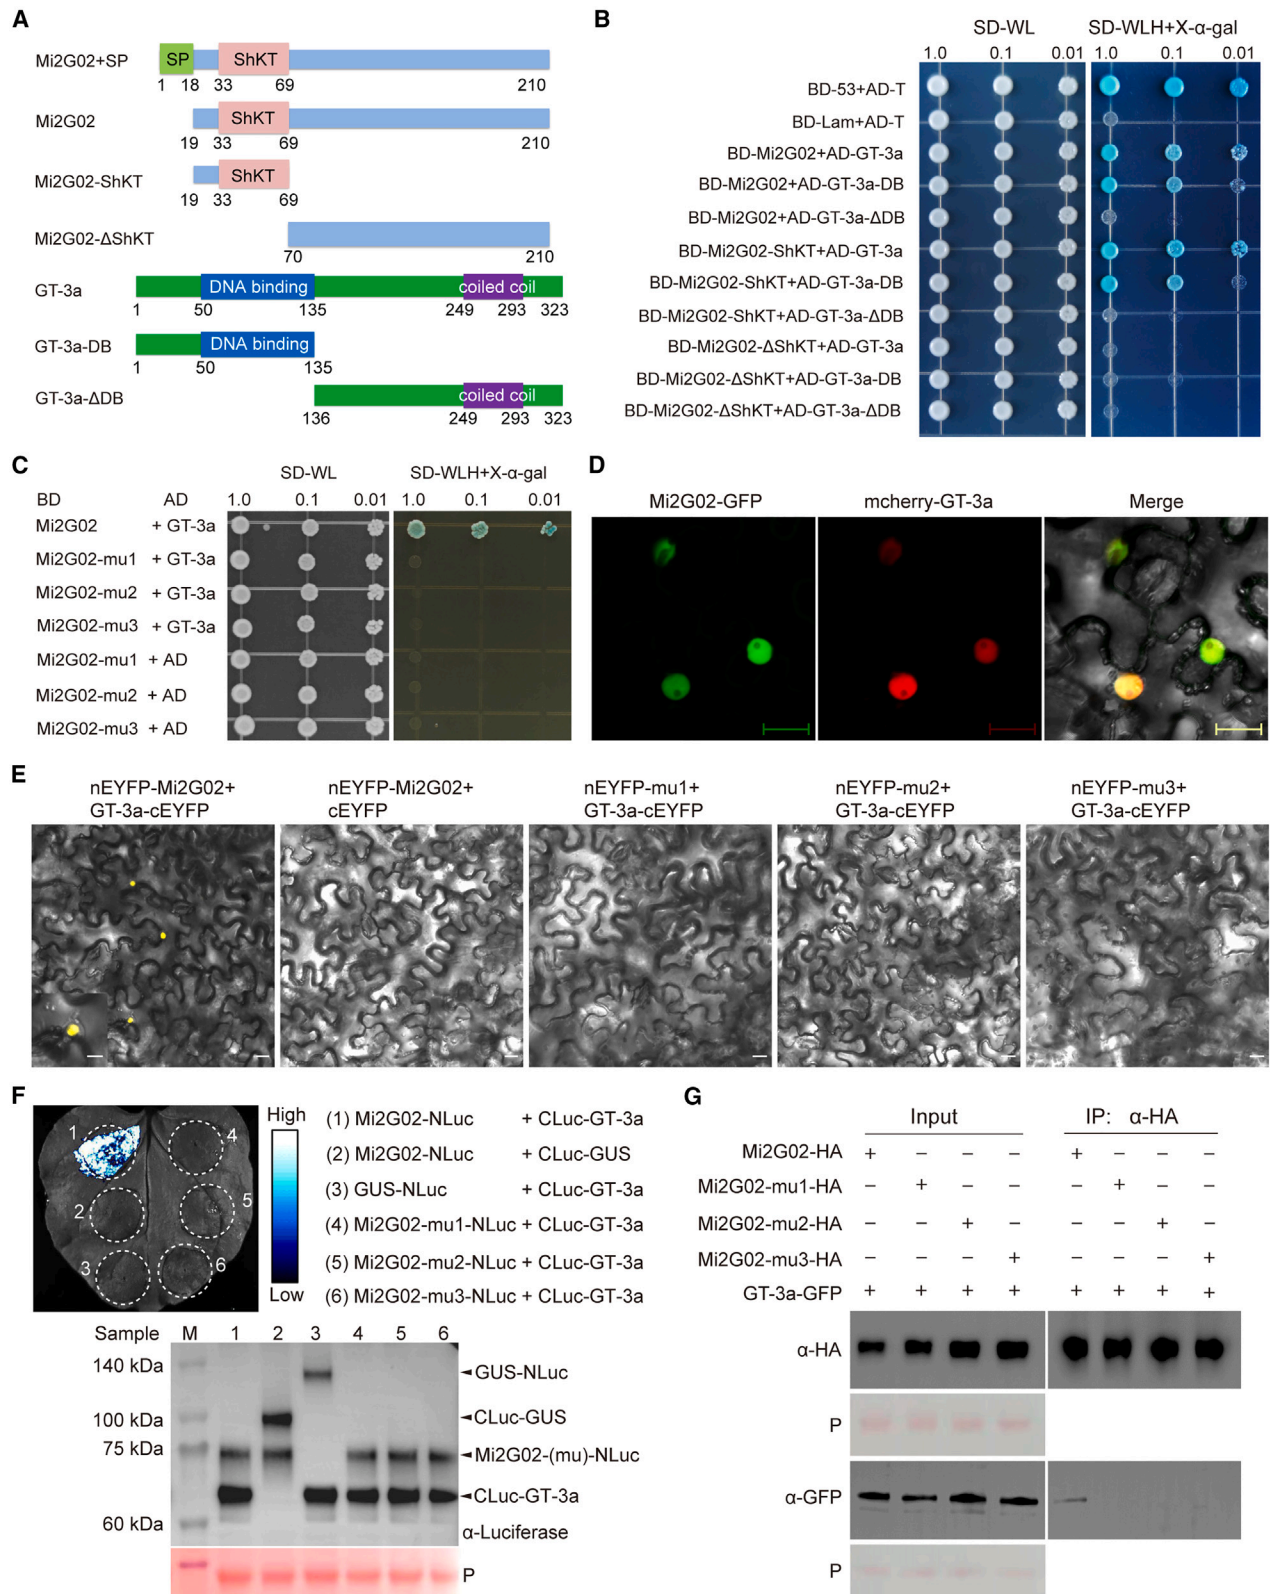

**Figure 3. The Mi2G02 effector interacts with GT-3a in the nuclei.**

(A) Schematic representation of intact and truncated Mi2G02 (with or without the ShKT domain) and GT-3a (with or without the DNA-binding domain) used for yeast two-hybrid assays (Y2Hs).

(legend continued on next page)

(Supplemental Figure 4B and 4C). Two independent *GT-3a-GFP*-overexpressing lines were selected and verified by semiquantitative RT-PCR, western blotting, and observation of GFP fluorescence (Supplemental Figure 5D–5F). No macroscopic root phenotypes were observed in the two *gt-3a* T-DNA KO lines relative to wild-type Columbia-0 (Supplemental Figure 4G). As observed for Mi2G02, the two independent *GT-3a-GFP*-overexpressing lines had longer roots (8%;  $n = 10$ ), more lateral roots (92% and 87%;  $n = 10$ ), and greater lateral root density than the wild-type plants (Figure 4B and 4C; Supplemental Figure 4H). These lines were then subjected to nematode infection assays. *GT-3a*-overexpressing plants had larger numbers of galls and egg masses (37% and 48%,  $n = 18$ ) than control plants (Figure 4D and Supplemental Figure 5A). By contrast, the two *gt-3a* mutants were significantly less susceptible to *M. incognita* than control plants, as shown by their smaller numbers of galls (more than 60% fewer,  $n = 26$ ) and an almost complete absence of egg masses (Figure 4E and Supplemental Figure 5B). The areas covered by GCs were 40% ( $n = 10$ ) smaller in these KO lines than in control plants (Figure 4F). The *GT-3a* TF therefore regulates root development and plays an essential role in GC development and *M. incognita* parasitism.

### GT-3a targets and represses *TOZ* and *RAD23C*

We investigated the transcriptional activity of *GT-3a* by fusing the *GT-3a* coding sequence to the sequence encoding the GAL4 DB domain in the pGBKT7 (BD) vector and using the resulting plasmid to transform the yeast strain AH109. Yeast cells transformed with the positive control pCL-1, which encodes the full-length wild-type GAL4 protein, grew well on SD-Trp-His selection medium and displayed 5-bromo-4-chloro-3-indolyl- $\alpha$ -D-galactopyranoside (X- $\alpha$ -Gal) activity (Figure 5A). By contrast, yeast cells harboring BD-*GT-3a* or the empty BD plasmid (negative control) were unable to grow on SD-Trp-His selection medium (Figure 5A). These results suggest that *GT-3a* does not act as a transcriptional activator and probably acts by repressing gene expression.

We next sought to identify genes whose expression is modulated by *GT-3a* by searching *A. thaliana* promoter sequences for the 5'-GTTAC-3' DNA element, which is known to be specifically tar-

geted by *GT-3a* (Ayadi et al., 2004), and the 5'-CACGTG-3' DNA element with the PlantRegMap tool (Tian et al., 2019). We also turned to the ePlant online tools to explore the expression patterns of candidate genes during nematode infection and in developing roots (Waese et al., 2017). We retrieved nine putative *GT-3a* targets (Supplemental Table 2), which were then further studied with a yeast one-hybrid (Y1H) approach. The Y1H assay revealed that *GT-3a* bound directly to the promoters of *TORMOZ* (*TOZ*; AT5G16750), *RADIATION SENSITIVE 23C* (*RAD23C*; AT3G02540), and a WRKY TF (*WRKY2*; AT5G56270) (Figure 5B and Supplemental Figure 6).

We investigated the ability of *GT-3a* to repress the expression of *TOZ*, *RAD23C*, or *WRKY2* in dual-luciferase reporter assays. A construct expressing *GT-3a* and a reporter construct consisting of the *TOZ*, *RAD23C*, or *WRKY2* promoter driving transcription of the firefly luciferase (*LUC*) reporter gene were used for co-infiltration of *N. benthamiana* leaves. *GT-3a* decreased the activity of the *TOZ* and *RAD23C* promoters, measured as the firefly-to-*Renilla* (LUC/REN) luciferase ratio, by 30% and 50%, respectively, relative to the GFP control, but it did not decrease *WRKY2* promoter activity (Figure 5C). To confirm this result, we used qRT-PCR to quantify *TOZ* and *RAD23c* expression in transgenic *A. thaliana* plants overexpressing *GT-3a*. Both *TOZ* and *RAD23c* appeared to be repressed in the two independent transgenic lines relative to the wild type (Figure 5D).

Finally, we produced a recombinant *GT-3a* protein, which was used in a gel electrophoretic mobility shift assay (EMSA). *GT-3a*-His significantly decreased the electrophoretic mobility of *TOZ* and *RAD23C* promoter probes containing GTTAC or CACGTG elements but had no effect on the mobility of mutated probes (GTTAC replaced by AAAAA, CACGTG replaced by AAAAAA) (Figure 5E). This result validates the binding of *GT-3a* to the *TOZ* and *RAD23c* promoters and indicates that both the GTTAC and CACGTG elements are important for binding.

These results confirm that *GT-3a* can bind specifically to the *TOZ* and *RAD23C* promoters, downregulating expression of the genes driven by these promoters.

**(B)** Pairwise Y2H tests were performed to investigate the interactions between Mi2G02 or the ShKT domain and *GT-3a* or the DNA-binding (DB) domain. Left column: growth of yeast cells carrying baits in the pGBKT7 vector (BD) and preys in the pGADT7 (AD) on SD/-Trp-Leu (SD-WL) medium, with growth indicating successful transformation of the yeast with both plasmids. Right column: yeast cell growth on selective dropout medium (SD/-Trp-Leu-His, SD-WLH) after addition of 20 mg/ml X- $\alpha$ -gal, with growth indicating protein interaction. Yeast cells containing p53 and SV40 large T antigen were used as a positive control, and yeast cells containing lamin and SV40 large T antigen were used as a negative control.

**(C)** Pairwise Y2H tests were performed to investigate the interactions between Mi2G02 mutants and *GT-3a*.

**(D)** Mi2G02 co-localizes with *GT-3a* in *N. benthamiana* nuclei. Mi2G02 fused with GFP at the C terminus (Mi2G02-GFP) and *GT-3a* fused with mCherry at the N terminus (mCherry-GT-3a) were co-expressed in *N. benthamiana* leaf cells. The fluorescence signal was detected at 48 h after infiltration. Images were captured by confocal microscopy. Scale bars, 20  $\mu$ m.

**(E)** Bimolecular fluorescence complementation experiments demonstrate the interaction between Mi2G02 and *GT-3a*. *N. benthamiana* leaves were transformed with different combinations of nEYFP- and cEYFP-fused vectors. Images were obtained 48 h after co-expression. Yellow fluorescent protein (YFP) signals were observed in the nuclei of leaves co-infiltrated with nEYFP-Mi2G02 and *GT-3a*-cEYFP. Scale bars, 20  $\mu$ m. See also Supplemental Figure 3C.

**(F)** Determination of the interaction between Mi2G02 and *GT-3a* by luciferase complementation assay. *A. tumefaciens* harboring different combinations of plasmids were infiltrated into indicated regions of *N. benthamiana* leaves. Luciferase activities were recorded at 2 days post agroinfiltration by spraying 1 mM luciferin solution onto the infiltrated leaves and detecting luciferase activity with a low-light cooled CCD imaging apparatus. Luciferase activity is depicted with false color from low (black) to high (white). The protein levels of Mi2G02-NLuc, Mi2G02-mu1-NLuc, Mi2G02-mu2-NLuc, Mi2G02-mu3-NLuc, CLuc-GT-3a, GUS-NLuc, and CLuc-GUS were determined by western blotting using anti-luciferase antibody. Ponceau S (P) staining provided a loading control.

**(G)** Mi2G02 associates with *GT-3a* in a co-IP assay. *A. tumefaciens* harboring different combinations of plasmids were infiltrated into *N. benthamiana* leaves. co-IP was performed with BeyoMag Anti-HA magnetic beads, and the eluted protein was detected by western blotting with antibodies against HA and GFP. GFP (green fluorescent protein) and P (Ponceau staining) indicate sample loading.



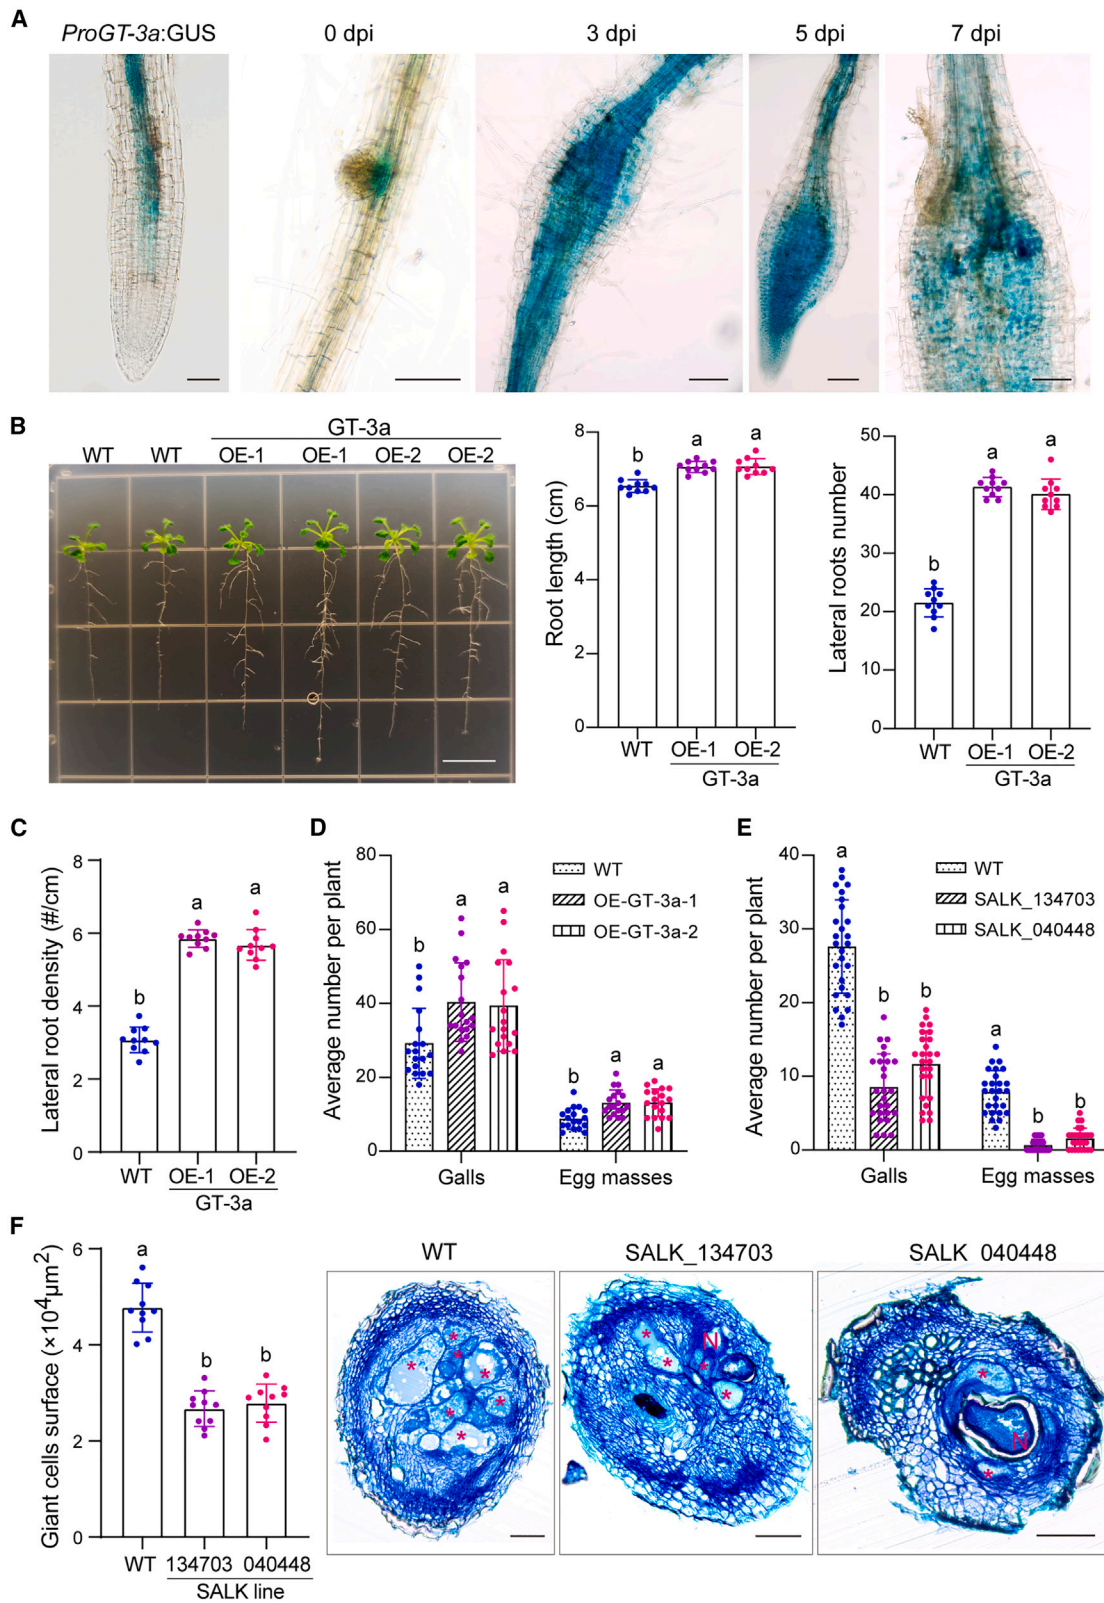

**Figure 4. GT-3a is involved in *M. incognita* parasitism and lateral root development.**

(A) Activity of the *GT-3a* promoter was analyzed in uninfected roots and in galls induced by *M. incognita* in *A. thaliana* expressing the *ProGT-3a:GUS* construct. dpi, days post infection. Scale bars, 100  $\mu\text{m}$ .

(legend continued on next page)



### Mi2G02 promotes GT-3a function by stabilizing GT-3a protein level to promote nematode parasitism

The *toz* mutant is not viable at postembryonic stages (Griffith et al., 2007) and therefore could not be tested in interaction with the nematode. We investigated the role of *RAD23C* in the plant response to *M. incognita* parasitism with a *rad23c* T-DNA KO mutant *A. thaliana* line (SALK\_068091) obtained from the Arabidopsis Biological Resource Center (Supplemental Figure 7A). Homozygous KO plants were verified by PCR with genomic DNA (Supplemental Figure 7B) and by qRT-PCR with cDNA (Supplemental Figure 7C). No difference in root phenotype was observed between the *rad23c* T-DNA KO line and the wild type (Supplemental Figure 7D), consistent with previous reports (Farmer et al., 2010). After *M. incognita* infection, the *rad23c* KO lines were significantly more susceptible to the nematode than control plants, as shown by the larger numbers of galls (43%,  $n = 28$ ) and egg masses (39%) (Figure 6A and Supplemental Figure 7E). *RAD23C* therefore downregulates *M. incognita* parasitism.

We addressed the potential outcome of Mi2G02 binding to GT-3a more precisely by co-expressing Mi2G02 and GT-3a in *N. benthamiana* leaves and performing dual-luciferase reporter assays. The previously observed suppression of *TOZ* and *RAD23C* expression mediated by GT-3a was significantly enhanced in the presence of Mi2G02 (Figure 6B). We also performed transient expression assays and western blotting to determine whether Mi2G02 affected the amount of GT-3a protein in agroinfiltrated leaves of *N. benthamiana*. Co-expression of Mi2G02 and GT-3a-GFP in *N. benthamiana* leaves resulted in a significantly higher GFP fluorescence intensity (500%–660% higher) compared with controls using mutant Mi2G02 or MiEFF18 (Figure 6C and Supplemental Figure 8). Similarly, co-expression of Mi2G02 and GT-3a in *N. benthamiana* leaves resulted in high levels of GT-3a protein accumulation. No such accumulation was observed with the empty vector, Mi2G02 mutants, or MiEFF18, which were used as negative controls (Figure 6D and 6E). Furthermore, treatment with the proteasome inhibitor MG132 inhibited GT-3a degradation (Figure 6E), suggesting that Mi2G02 stabilizes GT-3a protein levels by inhibiting the 26S proteasome-dependent pathway. Together, these results suggest that the Mi2G02 effector helps to stabilize the GT-3a protein, enabling GT-3a to repress the target genes *TOZ* and *RAD23C* and thus promote nematode parasitism (Figure 7).

## DISCUSSION

Phytopathogen success depends upon secretion of effector proteins that reprogram the host transcriptome to facilitate parasitism. Pathogens have been shown to secrete effectors that can function as TFs or target TFs to manipulate host cell physiology and/or immunity. In plant–nematode interactions, the 10A07 effector from the sugar beet cyst nematode, *Heterodera schachtii*, is expressed in the nematode dorsal gland cell and targets a plant kinase and the IAA16 TF. There is also evidence to suggest that the 10A07–IAA16 interaction interferes with auxin signaling by modulating the expression of several auxin response factors (Hewezi et al., 2015). Nevertheless, the function of nematode nuclear effectors and the ways in which they manipulate their host targets for feeding-site initiation and development remain largely unknown. In this study, we characterized the function of the nuclear effector protein Mi2G02 and identified its plant target for GC formation, the nuclear trihelix TF GT-3a.

Trihelix TFs (GTs) are unique to plants and have been shown to participate in embryogenesis and subsequent plant growth and development, as well as abiotic stress responses (Kaplan-Levy et al., 2012). *A. thaliana* *AtGT-3b* and maize (*Zea mays*) *ZmGT-3b*, both members of the GT-1 clade, are induced by pathogens (Park et al., 2004; Zhang et al., 2021). Here, we show that Mi2G02 can interact with the *A. thaliana* GT-1 clade protein AtGT-3a, resulting in the stabilization of this protein. *AtGT-3a* is induced during the development of galls induced by *M. incognita*. Using *A. thaliana* transgenic plants in which *AtGT-3a* expression was suppressed or constitutively induced, we demonstrated that AtGT-3a is important for GC development and successful RKN parasitism.

The *de novo* formation of new organs, such as lateral roots, rhizobium-induced nodules, or nematode-induced galls, from one or a few root cells requires the recruitment of similar developmental programs (Yamaguchi et al., 2017; Soyano et al., 2019; Olmo et al., 2020). Several genes, including *ABERRANT LATERAL ROOT FORMATION 4* (*ALF4*), a *RIBULOSE-PHOSPHATE 3-EPIMERASE* (*RPE*), and *YUCCA4* (*YUC4*), have been reported to have functions associated with lateral root initiation and/or development, and their expression is regulated in nematode-induced galls; they have also been shown to be required for normal feeding-site formation and nematode development (Favery et al.,

**(B)** *A. thaliana* phenotypes, relative root length, and relative lateral root numbers of *A. thaliana* lines ectopically expressing *Mi2G02* compared with the wild type (WT). Data represent the average length  $\pm$  SD ( $n = 10$ ) and the average number  $\pm$  SD ( $n = 10$ ). Different letters indicate significant differences ( $P < 0.05$ , one-way ANOVA). Scale bar, 1 cm. See also Supplemental Figure 4H.

**(C)** Lateral root density calculated as the number of emerged lateral roots divided by the total primary root length. Different letters indicate significant differences ( $P < 0.05$ , one-way ANOVA).

**(D)** Overexpression of *GT-3a* in *A. thaliana* increased susceptibility to *M. incognita*. Two independent T3 lines ectopically expressing *GT-3a* were inoculated with *M. incognita* pre-J2s. Total numbers of galls and egg masses were counted at 35 dpi. *M. incognita* inoculated WT *A. thaliana* inoculated with *M. incognita* was used as a control. Data are the average number  $\pm$  SD ( $n = 18$ ). Different letters indicate significant differences ( $P < 0.05$ , one-way ANOVA). See also Supplemental Figure 5A.

**(E)** The *gt-3a* T-DNA knockout mutants (SALK\_134703 and SALK\_040448) were less susceptible to *M. incognita* compared with the WT, as indicated by mean numbers of galls and egg masses. Data are the average number  $\pm$  SD ( $n = 26$ ). Different letters indicate significant differences ( $P < 0.05$ , one-way ANOVA). See also Supplemental Figure 5B.

**(F)** Giant cell areas of *M. incognita*-induced galls were significantly reduced in the *A. thaliana* *gt-3a* T-DNA knockout mutant lines. Gall sections at 21 dpi were stained with toluidine blue. Smaller giant cells were observed in *gt-3a* T-DNA knockout mutant lines compared with the WT. Data are the average surface area  $\pm$  SD ( $n = 10$ ). Different letters indicate significant differences ( $P < 0.05$ , one-way ANOVA). Asterisk, giant cell; N, nematode. Scale bars, 100  $\mu$ m.

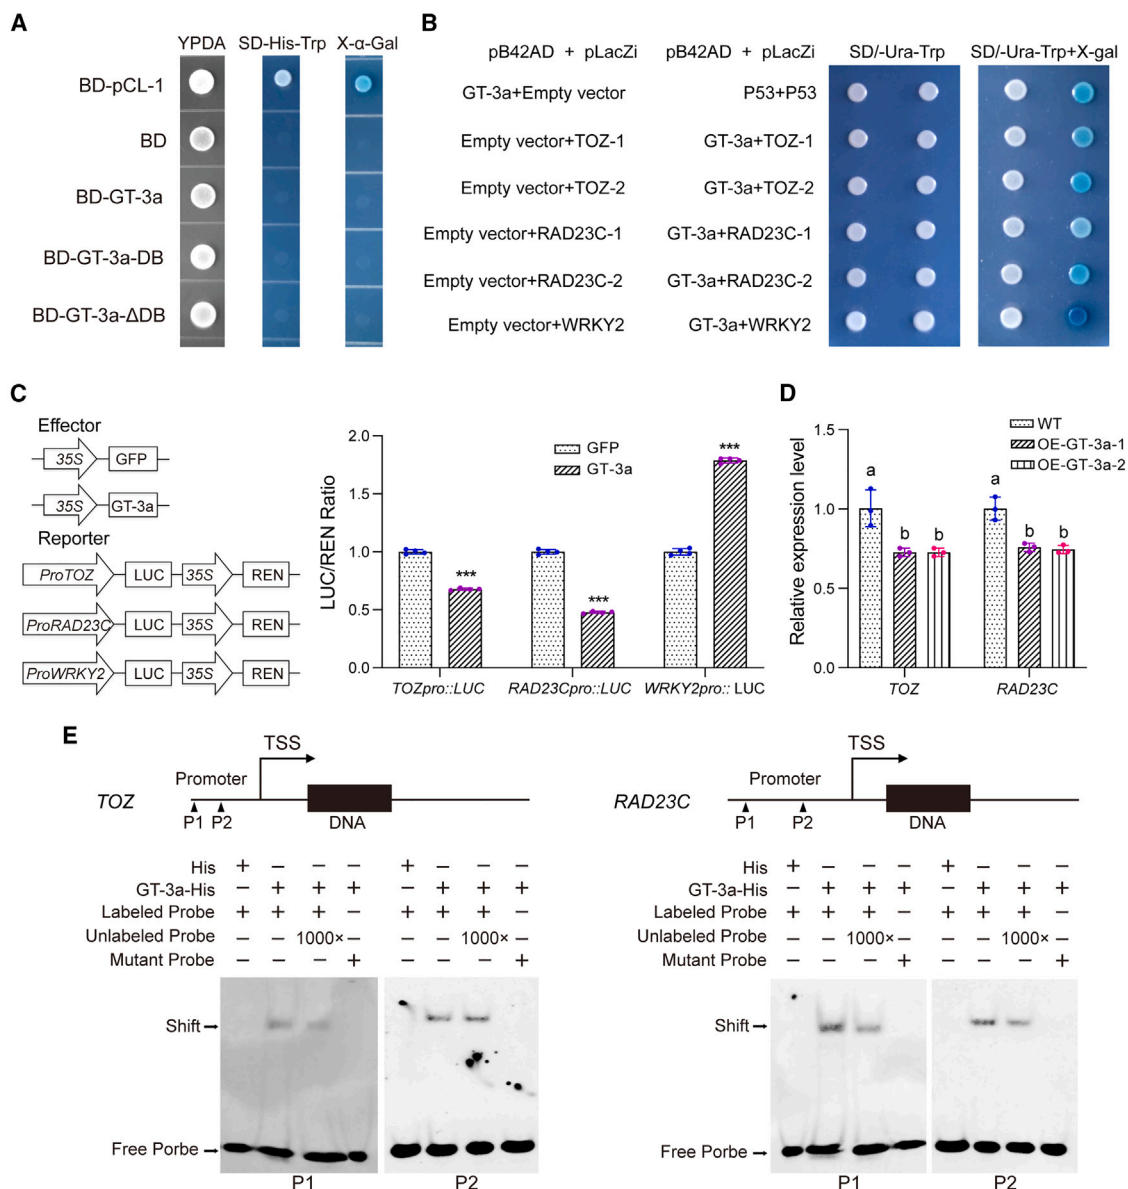

**Figure 5. Targeting and suppression of TOZ and RAD23C by GT-3a and susceptibility of toz and rad23c knockout mutant lines to *M. incognita*.**

**(A)** Transcriptional activity of GT-3a in yeast cells. The yeast AH109 strain expressing pCL-1, GT-3a, and GT-3a with or without the DNA-binding domain (GT-3a-DB or GT-3a- $\Delta$ DB) grew on yeast peptone dextrose adenine agar (YPDA) or the selective medium SD-His-Trp with or without X- $\alpha$ -gal. pCL-1 encoding full-length GAL4 and the empty vector pGBKT7 (BD) were used as positive and negative controls, respectively.

**(B)** Yeast one-hybrid experiments showed that GT-3a bound to the promoters of TOZ, RAD23C, and WRKY2. Promoter fragments containing the GTTAC or CACGTG element were cloned into the pLacZi vector, and GT-3a was cloned into the pB42AD vector. The pLacZi vector was then co-transformed with pB42AD-GT-3a into yeast strain EGY48. The yeast transformants were spotted on SD/-Ura-Trp plates with or without 20 mg/ml X-gal. pB42AD-p53 and pLacZi-p53 were used as positive controls.

**(C)** Luciferase reporter assays of GT-3a-induced suppression of TOZ and RAD23C expression in *N. benthamiana*. LUC activity was measured by normalizing to the REN signal. Values are means  $\pm$  SE ( $n = 4$ ). Asterisks indicate significant differences according to a two-tailed Student's *t*-test, \*\*\* $P < 0.001$ . Similar results were obtained from three independent experiments (biological replicates).

**(D)** qRT-PCR analysis of TOZ and RAD23C expression in wild-type (WT) *A. thaliana* and GT-3a-overexpressing *A. thaliana* lines. UBP22 (AT5G10790) was used as an internal control. Data represent the mean of three independent experiments  $\pm$  SE ( $n = 3$ ). Similar results were obtained from three independent experiments (biological replicates). Different letters indicate significant differences ( $P < 0.05$ , one-way ANOVA).

**(E)** EMSAs confirmed that GT-3a-His could bind directly to the promoters of TOZ and RAD23C. Promoter fragments containing the GTTAC element (P1 probe), the CACGTG element (P2 probe), or mutant elements (AAAAA or AAAAAA) were labeled with biotin as probes. 6 $\times$ His alone served as a negative control. Unlabeled probes were used as competing probes.

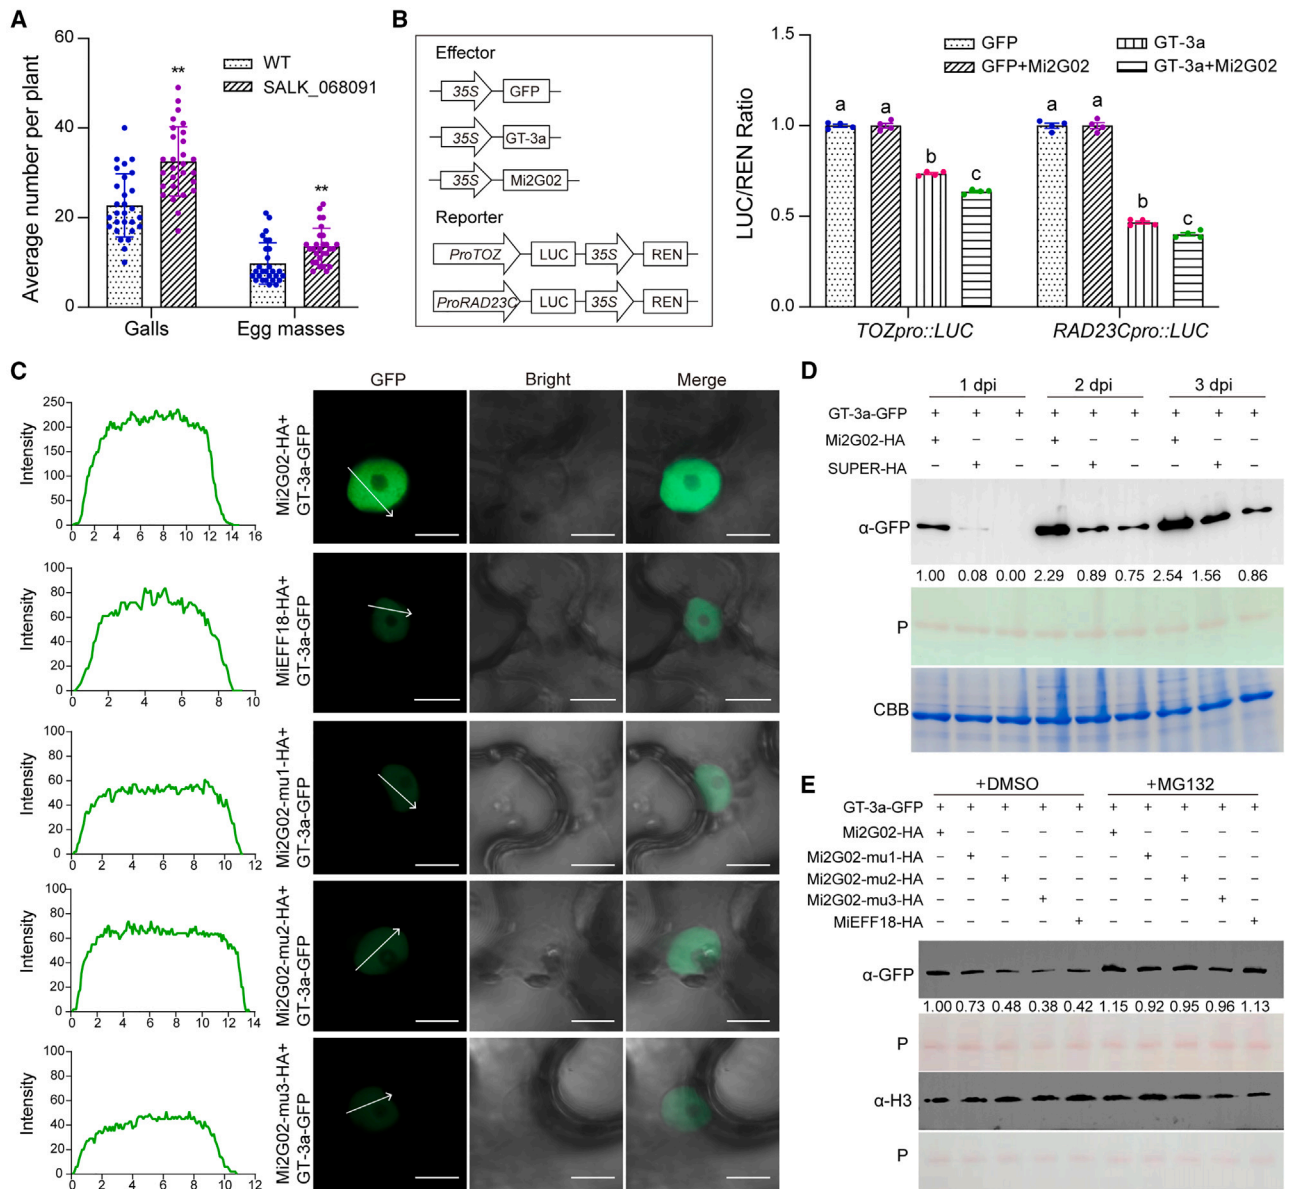

**Figure 6. Mi2G02 stabilizes GT-3a to promote its function in suppression of TOZ and RAD23C expression for nematode parasitism.**

(A) The *rad23c* T-DNA knockout mutant is more susceptible than the wild type (WT) to *M. incognita*. The *rad23c* KO mutant (SALK\_068091) was inoculated with nematodes, and numbers of galls and egg masses were counted 35 days post inoculation. The data presented are mean numbers per plant ± SD ( $n = 28$ ). Similar results were obtained in three independent experiments. Asterisks indicate significant differences according to two-tailed Student's *t*-tests, \*\* $P < 0.01$ . See also Supplemental Figure 7E.

(B) Luciferase reporter assays showed that the GT-3a-induced suppression of *TOZ* and *RAD23C* expression in *N. benthamiana* was enhanced by Mi2G02 expression. LUC activity was determined and normalized against the REN signal. The data presented are means of three independent experiments ± SEM ( $n = 4$ ). Different letters indicate significant differences ( $P < 0.05$ , one-way ANOVA).

(C) Mi2G02 stabilizes GT-3a-GFP fluorescence intensity. GT-3a was co-expressed with Mi2G02 in *N. benthamiana* leaves, and Mi2G02 mutants and MiEFF18 (a nuclear *M. incognita* effector that does not interact with GT-3a) were used as controls. GT-3a-GFP fluorescence was detected with a confocal microscope (Zeiss LSM700) 48 h after infiltration. Graphs show the fluorescence intensity profiles across the arrows in the GFP images. Scale bar, 10 μm. See also Supplemental Figure 8.

(D) Mi2G02 stabilizes the GT-3a protein, leading to its accumulation. GT-3a was co-expressed with Mi2G02 or GFP in *N. benthamiana* leaves. The GT-3a protein was detected with an anti-GFP antibody. Band intensity was determined with ImageJ software and is indicated below the bands. Coomassie brilliant blue staining (CBB) and Ponceau staining (P) were used to check protein sample loading.

(E) Mi2G02 inhibits GT-3a degradation via the 26S proteasome pathway *in vivo*. GT-3a-GFP was co-expressed with Mi2G02-HA and Mi2G02 mutants in *N. benthamiana* leaves. The 26S proteasome inhibitor MG132 (100 μM) was infiltrated into *N. benthamiana* leaves 24 h before protein extraction. Band intensity was determined with ImageJ software and is indicated below the bands.



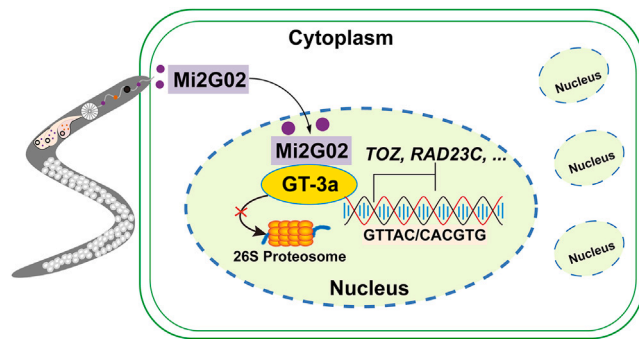

**Figure 7. A proposed working model illustrating the molecular mechanism of interaction among Mi2G02, GT-3a, TOZ, and RAD23C in nematode parasitism.**

In the early stage of *M. incognita* parasitism, the Mi2G02 effector protein is secreted into the plant cell and translocates to the plant nucleus, where it targets the transcription factor GT-3a and stabilizes its protein level by inhibiting the 26S proteasome pathway, leading to suppression of *TOZ* and *RAD23C* expression and thus promoting nematode feeding cell formation and development.

1998; Olmo et al., 2019; Suzuki et al., 2022). These genes include cell-cycle genes and TF genes, such as *LBD16* and *PUCHI*, that play key roles in controlling lateral root initiation and morphogenesis (Torres-Martínez et al., 2019); they are induced following nematode infection and are required for feeding-site development and successful RKN parasitism (Cabrera et al., 2014b ; Suzuki et al., 2021). Similarly, *Medicago truncatula* *LBD16* mutants display nodule initiation defects upon inoculation with *Sinorhizobium meliloti* (Schiessl et al., 2019). The rewiring of transcriptional networks to alter root-system architecture also involves changes in endogenous levels of growth-related plant hormones and the production of phytohormones or deployment of hormone-mimicking strategies by symbiotic and parasitic microbes (Gheysen and Mitchum, 2019; Eichmann et al., 2021). We show here that expression of *Mi2G02* in *A. thaliana* can promote root growth and GC development and that Mi2G02 acts by stabilizing AtGT-3a, with mutations of the gene encoding this TF also impairing GC formation. *AtGT-3a* was found to be strongly induced at the onset of lateral root development (this study and Ayadi et al., 2004). *AtGT-3a* therefore seems to be one of the TFs that regulate both lateral root development and nematode feeding-site neo-organogenesis.

Binding of GT-3a to the promoter of the *TOZ* and *RAD23C* genes was confirmed by Y1H and EMSA assays. *TOZ* is a predicted WD40 repeat protein involved in the regulation of cell-division planes and the expression of patterning genes during embryogenesis. It may therefore be involved in plant embryogenesis and organogenesis, including root development (Griffith et al., 2007), suggesting a possible role in the regulation of root-knot neo-organogenesis. *RAD23* probably acts as a shuttle protein, delivering ubiquitinated substrates to the ubiquitin/26S proteasome system for degradation. Roles in plant processes as diverse as the cell cycle, cell morphogenesis, and flower development have been proposed for *RAD23* (Farmer et al., 2010; Maclean et al., 2014). Interestingly, a role for *RAD23* proteins in plant immunity has been proposed, probably through interactions with stress-associated proteins (SAPs) acting as ubiquitin E3 ligases (Kang et al., 2017; Liu et al., 2019). Consistent with this

notion, *RAD23* proteins have been shown to be targeted by plant-pathogen effectors, possibly to modulate host protein degradation and suppress host defense responses. *A. thaliana* *RAD23A* was identified as a putative target of the *Pseudomonas syringae* HopM1 effector (Nomura et al., 2006), and the phytoplasma SAP54 effector was shown to interact with both *RAD23C* and *RAD23D* (Maclean et al., 2014). Intriguingly, a previous report confirmed that *RAD23* proteins were associated with the 26S proteasome and played an essential role in the cell cycle (Farmer et al., 2010), so roles of GT-3a and *RAD23C* in proteolysis and cell-fate determination are expected. In support of this prediction, transcription activity assays performed in yeast and *in planta* demonstrated that GT-3a downregulated expression of *TOZ* and *RAD23C*, and this suppression was enhanced by co-expression of GT-3a with Mi2G02. Moreover, Mi2G02 stabilized GT-3a protein level by inhibiting the 26S proteasome-dependent pathway. Using *rad23c* KO *A. thaliana* lines, we showed that *RAD23C* inactivation increased susceptibility to RKNs, demonstrating that *RAD23C* is a key gene for plant-nematode interactions.

It has been suggested that Mi2G02 interferes with both jasmonate signaling and plant immune responses (Song et al., 2021). Mi2G02 expression *in planta* resulted in the accumulation of jasmonoyl-isoleucine, the endogenous bioactive form of jasmonate (JA), in transgenic *A. thaliana*, and a dysregulation of the expression of *JASMONATE ZIM DOMAIN* (*JAZ*) transcriptional repressors and jasmonate-responsive genes (Song et al., 2021). Our data indicate that Mi2G02 could divert the host plant developmental program to promote formation of the feeding sites important for nematode development and reproduction. RKNs may secrete the 2G02 effector to stabilize GT-3a, maintaining the concentration of this TF at a sufficiently high level to repress the growth regulator genes *TOZ* and *RAD23c*, thereby promoting GC development. We hypothesize that, as previously suggested for ZmGT-3a (Zhang et al., 2021), GT-3a acts at the interface between growth and immunity. Microbes can interfere with central regulators of root cell identity and root growth that are also involved in the response to biotic stress (Rich-Griffin et al., 2020; Üstüner et al., 2022). Plant hormones, whose signaling pathways may interact at central hubs, also regulate growth-immunity tradeoffs (Huot et al., 2014; Guo et al., 2018). For instance, crosstalk between signaling pathways of gibberellin (GA)-mediated growth and jasmonic acid (JA)-mediated defense contributes to maintaining the balance between growth and immunity (Huot et al., 2014; Pieterse et al., 2014). *DELLA* proteins repress growth-related TFs unless they are degraded in the presence of growth-promoting GA. *DELLA* also binds to *JAZs*, and *DELLA* degradation allows *JAZs* to interact with their cognate TFs, thereby decreasing JA-dependent signaling. Treatment with flg22 suppresses GA-mediated *DELLA* degradation, leading to an inhibition of root growth dependent on salicylic acid, an antagonist of the JA signaling pathway (Huot et al., 2014; Pieterse et al., 2014). JA is a known growth inhibitor that stabilizes *DELLA* and has been shown to downregulate the cyclin-dependent kinases *CDKA1* and *CYCB1* required for cell-cycle progression (Reitz et al., 2015; Qi and Zhang, 2020). Biotic stress may therefore affect cell-cycle regulators, and cell division and hormones influence the underlying regulatory mechanisms.

The plant response to pathogens is highly dependent on the interplay between immunity and development. Regulators of



cell identity and TFs may play a crucial role in connecting the developmental and immunity gene networks to reflect response specificity (Rich-Griffin et al., 2020). By modulating GT-3a TF availability in plant cells, the RKN effector Mi2G02 can alter both the root developmental program and JA-dependent signaling pathways to allow GC formation and successful parasitism. In this respect, GT-3a constitutes a novel example of a key regulator recruited by a biotrophic pathogen at the interface between growth and immunity.

## METHODS

### Nematodes and plant materials

*M. incognita* was reproduced on tomato plants (*Solanum lycopersicum* var. "MoneyMaker"). Egg masses and preparasitic second-stage juveniles (pre-J2s) were collected as described previously (Zhao et al., 2019). *A. thaliana* seeds were germinated on Murashige and Skoog medium (Coolaber, cat. no. PM1012) at 25°C in a growth chamber, and the seedlings were transplanted into pots of soil at 13 days. The *gt-3a* T-DNA mutant lines (SALK\_014703 and SALK\_040448) and the *At3g02540* (*rad23c*) T-DNA mutant line (SALK\_068091) were obtained from the Arabidopsis Biological Resource Center (USA). Homozygous plants were verified by PCR and semiquantitative RT-PCR. *N. benthamiana* and *A. thaliana* plants were grown in pots and placed in a culture room at 23°C under a 16-h light/8-h dark photoperiod, with fluorescent bulbs used to generate soft white light.

### Nematode infection and gall sections

*A. thaliana* seedlings (1 month after transplant) were inoculated with pre-J2s. For nematode susceptibility assays, *A. thaliana* roots were inoculated with 200 pre-J2s per plant. The roots were collected, and galls and egg masses were counted under a dissecting microscope (Olympus, Japan) 35 days post inoculation (dpi). For gall collection, roots were inoculated with 500 pre-J2s per plant. Galls were collected at 3, 5, 7, 14, and 21 dpi and fixed as described previously (Gavrillovic et al., 2016). At least 10 galls were fixed for each *A. thaliana* line. Gall sections were stained with 0.05% toluidine blue and photographed on a Zeiss AxioImager Z2 microscope (Zeiss, Germany). The areas of the GCs were measured with ImageJ software (Schindelin et al., 2012). In brief, the first step was to open the program and draw a line the same length as the image scale, then go to Analyze and Set Scale, enter 100 for known distance and  $\mu\text{m}$  for Unit of length, select Global, and click OK. The second step was to go to Analyze and Set Measurements, select Area, and click OK. The third step was to select Freehand selections, select the giant cell area, go to Analyze, select Measure, and click OK.

### DNA/RNA isolation and gene amplification

*M. incognita* RNA was extracted with TRIzol reagent (Invitrogen, USA, cat. no. 10296010) as described previously (Lin et al., 2013; Zhao et al., 2021). Total RNA was extracted from *A. thaliana* seedlings (10 days after germination) with the RNAprep Pure Plant Kit (TIANGEN, cat. no. DP432) according to the manufacturer's instructions. The RNA was then used for cDNA synthesis with M-MLV reverse transcriptase (TaKaRa, cat. no. 2641Q) in accordance with the manufacturer's instructions. DNA was extracted with the Plant Genomic DNA Kit (TIANGEN, cat. no. DP305) according to the manufacturer's instructions. Gene and promoter sequences were amplified from cDNA or gDNA by PCR with specific primers. All the primers used in this study are provided in Supplemental Table 3 and were synthesized by Tsingke Biotechnology (Beijing, China).

### qRT-PCR analysis

RNA was extracted, and cDNA was synthesized for qRT-PCR on the Bio-Rad CFX96 real-time PCR system (Bio-Rad, USA) as follows: 95°C for 5 min and 40 cycles of 95°C for 30 s and 60°C for 30 s. The data were analyzed with the  $2^{-\Delta\Delta C_t}$  method (Livak and Schmittgen, 2001). For internal controls, *M. incognita* GAPDH (*Minc12412*) or *A. thaliana* UBP22

(*AT5G10790*) was used for normalization of qRT-PCR data. qRT-PCR assays were repeated three times.

### Plasmid construction and plant transformation

For RNAi experiments in *A. thaliana*, a 204-nt *Mi2G02* fragment was amplified and inserted upstream and downstream of the pSAT5 intron in the forward and reverse orientations (Dafny-Yelin et al., 2007), then inserted into the pSUPER destination vector to construct pSUPER-Mi2G02-RNAi.

A signal-peptide-deficient *Mi2G02* sequence and ShKT domain were amplified by PCR and inserted into the Super-GFP vector (C-terminal GFP) to generate Super-Mi2G02-GFP and Super-Mi2G02-ShKT-GFP. The nuclear localization sequences of *Mi2G02* were mutated and inserted into the Super-GFP vector to generate Super-Mi2G02-mu1-GFP, Super-Mi2G02-mu2-GFP, and Super-Mi2G02-mu3-GFP. The open reading frame (ORF) of *GT-3a* was inserted into the pBin-mCherry vector (N-terminal mCherry) to generate pBin-mCherry-GT-3a. Plasmids were checked by sequencing and used to transform *Agrobacterium tumefaciens* strain GV3101.

For ectopic expression in *A. thaliana*, the ORFs of *Mi2G02* (without signal peptide sequences) and AT5G01380 (*GT-3a*) were amplified, and the corresponding PCR fragments were inserted into the Super-HA vector (C-terminal HA tag) and the Super-GFP vector (C-terminal GFP tag) to construct Super-Mi2G02-HA and Super-GT-3a-GFP, respectively. The plasmids were verified by sequencing and used to transform *A. tumefaciens* GV3101, with empty vectors used as a control.

For Y2H screens, *Mi2G02* (lacking the signal peptide sequence) was amplified and inserted into the pGBKT7 (BD) vector. For pairwise Y2H verification, the coding sequences of AT5G01380 (*GT-3a*), AT3G52590, and AT3G02550 were inserted into the pGADT7 (AD) vector. For identification of the key domains for interaction, *Mi2G02-ShKT* (*Mi2G02* retaining the ShKT domain) and *Mi2G02-ΔShKT* (*Mi2G02* without the ShKT domain) were amplified and inserted into BD vectors, and *GT-3a-DB* (*GT-3a* retaining the DNA-binding domain) and *GT-3a-ΔDB* (*GT-3a* lacking the DNA-binding domain) were inserted into AD vectors. The plasmids were verified by sequencing and used to transform Y2HGold competent yeast cells.

For the Y1H assay, the coding region of *GT-3a* was amplified and inserted into the pB42AD vector. Fragments of candidate promoters were amplified and inserted into the pLacZi vector.

For the BiFC assay, coding sequences of *Mi2G02* (lacking the signal peptide sequence) and *GT-3a* were inserted into the nE-YFP and cE-YFP vectors (Walter et al., 2004), respectively.

For the LCA, the full-length coding sequence of *Mi2G02* (lacking the signal peptide sequence) or *GT-3a* was inserted into the pCAMBIA1300-nLUC or pCAMBIA1300-cLUC vector. The plasmids were verified by sequencing and used to transform *A. tumefaciens* GV3101.

For the co-IP assay, the coding regions of *Mi2G02* (lacking the signal peptide sequence) or *GT-3a* were inserted into super1300 vectors with an HA tag and an FLAG tag, respectively, fused to the C-terminal end of the sequence. Plasmids were verified by sequencing and used to transform *A. tumefaciens* GV3101.

For GUS staining assays, a 2023-bp fragment of the *GT-3a* promoter was inserted into the pBI101 vector to generate *ProGT-3a:GUS*. The resulting plasmid was verified by sequencing and used to transform *A. tumefaciens* GV3101.

For dual-luciferase reporter assays, the coding sequence of *GT-3a* was amplified and inserted into the pCAMBIA3301 vector to generate pCAMBIA3301-GT-3a. A 623-bp fragment upstream of the start codon of *TOZ*

## Plant Communications

and a 595-bp fragment upstream of the start codon of *RAD23C* were amplified and inserted into the pro-LUC-35S-Rluc vector to generate *TOZpro-LUC-35S-Rluc* and *RAD23Cpro-LUC-35S-Rluc*, respectively. The plasmids were verified by sequencing and used to transform *A. tumefaciens* strain GV3101.

A recombinant GT-3a protein was produced by amplifying the coding sequence of GT-3a and inserting it into the pET30a vector (C-terminal His tag) to generate pET30a-GT-3a. The resulting plasmid was verified by sequencing and used to transform *Escherichia coli* strain BL21 (DE3) cells.

The primers (synthesized by Tsingke Biotechnology) and restriction enzymes (NEB, MA, USA) used for plasmid construction are listed in [Supplemental Table 3](#).

### Generation of transgenic *A. thaliana* plants and nematode infection assays

The sequenced pSUPER-Mi2G02-RNAi, Super1300-Mi2G02-HA, Super1300-GT-3a-GFP, and Super1300-GFP plasmids were used to transform *A. tumefaciens* strain GV3101. Four-week old *A. thaliana* plants were transformed with *A. tumefaciens* by the floral dip method ([Clough and Bent, 1998](#)). *A. thaliana* lines were confirmed to be homozygous for the transgene by quantitative PCR and/or western blotting. Nematode infection assays were performed three times.

#### Subcellular localization assay

Four-week-old *N. benthamiana* leaves were infiltrated with *A. tumefaciens* carrying the appropriate plasmids in infiltration buffer (10 mM MgCl<sub>2</sub>, 10 mM 2-(*N*-morpholino)ethanesulfonic acid [MES], and 0.1 mM acetosyringone [AS]) at an OD<sub>600</sub> of 0.4. Images were captured with a laser confocal fluorescence microscope (Zeiss LSM 700) 2 dpi at excitation wavelengths of 488 nm for GFP and 561 nm for mCherry.

#### Yeast two-hybrid and yeast one-hybrid assays

A cDNA library was constructed by extracting RNA from *A. thaliana* roots infected with *M. incognita* (1, 3, 5, 10, and 14 dpi) and used to screen for the target proteins of Mi2G02. The Y2H assay was performed according to the Clontech protocol (Clontech, USA). Interactions between Mi2G02 and candidate proteins were assessed in pairwise Y2H assays. Relative BD and AD vectors were used to transform the yeast strain Y2HGOLD for screening on SD/-Leu-Trp plates. Positive clones were verified and selected for culture on SD/-Leu-Trp-His medium supplemented with 20 mg/ml X- $\alpha$ -Gal (Coolaber, cat. no. SL0940). We investigated whether the nuclear localization sequences of *Mi2G02* were required for interaction by inserting a mutated *Mi2G02* in the BD vector for pairwise Y2H assays.

The Y1H assay was performed as described previously ([Kong et al., 2023](#)). The sequenced pB42AD and pLacZi vectors were integrated into the yeast strain EGY48 grown on SD/-Trp-Ura medium (Coolaber, cat. no. PM2262). Positive transformants were verified and selected for growth on medium containing raffinose (Coolaber, cat. no. SL0990) and 5-bromo-4-chloro-3-indolyl- $\beta$ -D-galactopyranoside (X-gal; Coolaber, cat. no. CX11921) for color reactions.

#### Bimolecular fluorescence complementation assay

BIFC assays were performed as described previously ([Zhao et al., 2019](#)). *Agrobacterium* harboring appropriate pairs of vectors was infiltrated into *N. benthamiana* leaves for 48 h. YFP fluorescence, indicating protein interaction, was captured with a confocal microscope (Zeiss LSM 700) with excitation at 514 nm and emission at 527 nm.

#### Luciferase complementation assay

*Agrobacterium* cultures were resuspended in infiltration buffer, incubated at room temperature for 3 h, and infiltrated into 4-week-old *N. benthamiana* leaves. Three days after agroinfiltration, 1 mM luciferin (Biovision, cat. no. 7903) was sprayed onto the infiltrated leaves, and luciferase activity was detected with a ChemiScope 6000 low-light cooled CCD imaging apparatus (Clinx Science Instruments, Shanghai, China).

## Role of RKN effector Mi2G02 in nematode parasitism

### In vivo co-immunoprecipitation assay

Total protein was extracted from 4-week-old *N. benthamiana* leaves co-expressing Mi2G02 and GT-3a after 48 h of infiltration; co-IP was performed with BeyoMag Anti-HA magnetic beads (Beyotime, cat. no. P2121) as described previously ([Zhao et al., 2021](#)). The eluted proteins were checked by western blotting with anti-GFP (ABclonal, cat. no. AE012) and anti-HA (Coolaber, cat. no. AB1105) antibodies, respectively.

### Histochemical analysis of GUS activities

Transgenic *A. thaliana* were generated as described above. The homozygosity of the transgenic lines was confirmed by PCR, and they were inoculated with *M. incognita*. Root samples were collected at 3, 5, 7, and 14 dpi. More than 10 roots were collected at each sampling time. Histochemical staining for GUS enzyme activity was performed with a GUS staining kit (Coolaber, cat. no. SL7160) in accordance with the manufacturer's instructions. Images were captured with a stereomicroscope (Zeiss AxioImager Z2).

### Dual-luciferase reporter assay

*Agrobacterium* harboring pCAMBIA3301-GT-3a was infiltrated with *TOZpro-LUC-35S-Rluc* or *RAD23Cpro-LUC-35S-Rluc*, with or without Mi2G02, into 4-week-old *N. benthamiana* leaves. Three days after infiltration, leaf disks with a diameter of 2 cm were harvested and ground in liquid nitrogen. Firefly and Renilla luciferase activities were measured with the Dual-Luciferase Reporter Assay System (Vazyme, cat. no. DL101-01) according to the manufacturer's instructions using a Synergy SLXFA plate reader (BioTek, USA).

### Electrophoretic mobility shift assay

The recombinant GT-3a-His protein was induced with 1 mM isopropyl- $\beta$ -D-thiogalactoside and purified with the His-tag Protein Purification Kit (Beyotime, cat. no. P2229S) according to the manufacturer's instructions ([Zhao et al., 2021](#)). Biotin-labeled and unlabeled probes for *TOZ* and *RAD23C*, containing the GTTAC element or the CACGTG element, were synthesized and purified by Sangon Biotech (Shanghai, China). EMSA was performed with an EMSA chemiluminescence kit (Beyotime, cat. no. GS009). Competition experiments were performed with various amounts of unlabeled oligonucleotides. The mutated competitor was generated by replacing five base pairs or six base pairs in the *TOZ* and *RAD23C* binding elements (GTTAC to AAAAA or CACGTG to AAAAAA). EMSA assays were repeated three times.

### Transient expression assays in *N. benthamiana* leaves

Four-week-old *N. benthamiana* leaves were infiltrated with *A. tumefaciens* carrying the appropriate plasmids in infiltration buffer (10 mM MgCl<sub>2</sub>, 10 mM MES, and 0.1 mM AS) at an OD<sub>600</sub> of 0.4. MG132 (100  $\mu$ M) was added 24 h before protein extraction.

### Cell fractionation, protein extraction, and western blotting

The cell fractionation assay was performed as described previously ([Wang et al., 2018](#)) with some modifications. In brief, *N. benthamiana* leaves expressing the appropriate proteins (0.5 g) were harvested and ground in liquid nitrogen and mixed with 2 ml/g of lysis buffer (20 mM Tris-HCl [pH 7.5], 20 mM KCl, 2 mM EDTA, 2.5 mM MgCl<sub>2</sub>, 25% glycerol, 250 mM sucrose, and 5 mM dithiothreitol) supplemented with protease inhibitor cocktail (Beyotime, cat. no. P1045). The homogenate was filtered through a double layer of Miracloth (Millipore, cat. no. 475855). The flow-through was centrifuged at 1500 g for 10 min at 4°C; the supernatant, consisting of the cytoplasmic fraction, was centrifuged at 10 000 g for 10 min at 4°C and then collected as the cytoplasmic fraction. The pellet from the first centrifugation was washed four times with 4 ml of NRBT buffer (20 mM Tris-HCl [pH 7.5], 2.5 mM MgCl<sub>2</sub>, 25% glycerol, and 0.2% Triton X-100) and then resuspended in 500  $\mu$ l of NRBT (20 mM Tris-HCl [pH 7.5], 10 mM MgCl<sub>2</sub>, 0.25 M sucrose, 0.5% Triton X-100, and 5 mM  $\beta$ -mercaptoethanol) supplemented with protease inhibitor cocktail and carefully overlaid on top of 500  $\mu$ l of NRBT (20 mM Tris-HCl, 10 mM MgCl<sub>2</sub> [pH 7.5], 1.7 M sucrose, 0.5% Triton X-100, and

5 mM  $\beta$ -mercaptoethanol) supplemented with protease inhibitor cocktail. The suspension was centrifuged at 16 000 g for 45 min at 4°C, and the pellet was collected as the nuclear fraction. 2× SDS loading buffer was then added to the cytoplasmic and nuclear fractions and boiled for 5 min. Actin was detected with an anti-actin antibody (ABclonal, cat. no. AC009) as a cytoplasmic marker. H3 proteins were detected using an anti-H3 antibody (ABclonal, cat. no. A2348) as a nuclear marker. Total proteins were extracted from *N. benthamiana* leaves or *A. thaliana* seedlings (10 days after germination) in RIPA lysis buffer (Beyotime, cat. no. P0031K) supplemented with protease inhibitor cocktail. For tag antibodies, we used anti-His (TransGen, cat. no. HT501), anti-GFP (ABclonal, cat. no. AE012), and anti-HA (Coolaber, cat. no. AB1105) antibodies with a goat anti-mouse immunoglobulin G (H + L)-horseradish peroxidase-conjugated secondary antibody (Coolaber, cat. no. AB2102). The protein was detected with the EasySee Western Blot Kit (TransGen, cat. no. DW101). Band intensity was determined with ImageJ software.

### Statistical methods

The significance of differences between two groups was assessed using two-tailed *t*-tests. For multiple comparisons, the significance of differences was assessed by one-way ANOVA followed by Tukey's test for multiple comparisons. All statistical analyses were performed with GraphPad Prism software version 8.3.0.

## ACCESSION NUMBERS

The accession numbers of major genes mentioned in this study are as follows: *Mi2G02* (AAQ10016), *GAPDH* (*Minc12412*), *GT-3a* (AT5G01380), *LBD41* (AT3G02550), *UBQ1* (AT3G52590), *TOZ* (AT5G16750), *RAD23C* (AT3G02540), *WRKY2* (AT5G56270), *UBP22* (AT5G10790), *SRP34* (AT1G02840), *DVL4* (AT1G13245), *SKP2* (AT1G21410), *FEI1* (AT1G31420), *FEI2* (AT2G35620), and *ABS4* (AT1G58340).

## DATA AND CODE AVAILABILITY

All relevant data are included in the main manuscript and the [supplemental information](#).

### SUPPLEMENTAL INFORMATION

Supplemental information is available at *Plant Communications Online*.

### FUNDING

This research was supported by the Youth Innovation Program of the Chinese Academy of Agricultural Sciences (grant no. Y2022QC06), the National Natural Science Foundation of China (grant nos. 32001878, 32172366), the Natural Science Foundation of Beijing (grant no. 6222054), the China Agricultural Research System (CARS-23), and the French Government (National Research Agency, ANR) through "Investments for the Future" LabEx SIGNALIFE (#ANR-11-LABX-0028-01), IDEX UCAJedi (#ANR-15-IDEX-0).

### AUTHOR CONTRIBUTIONS

J.Z., B.F., P.A., M.Q., H.J., B.X. and Z.M. conceived the project. J.Z., K.H., B.F., Y.L., J.L., and Y.Y. designed and planned the experiments. J.Z., K.H., R.L., and Y.Q.L. performed the experiments and collected and analyzed the data. J.Z., B.F., P.A., and M.Q. wrote the manuscript.

### ACKNOWLEDGMENTS

We thank Dr. Panpan Yang (Institute of Vegetables and Flowers, Chinese Academy of Agricultural Sciences, Beijing, China) for providing the CP516 vector and the p3301 vector, Dr. Jinzhao Jian (Institute of Plant Protection, Chinese Academy of Agricultural Sciences, Beijing, China) for advice concerning gall sections, and Dr. Qian Wei (the Core Facility Platform, Institute of Crop Sciences, Chinese Academy of Agricultural Sciences, Beijing,

China) for assistance with confocal microscopy. The authors declare no competing interests.

Received: July 3, 2023

Revised: August 12, 2023

Accepted: September 19, 2023

Published: September 22, 2023

## REFERENCES

- Abad, P., Gouzy, J., Aury, J.M., Castagnone-Sereno, P., Danchin, E.G.J., Deleury, E., Perfus-Barbeoch, L., Anthouard, V., Artiguenave, F., Blok, V.C., et al. (2008). Genome sequence of the metazoan plant-parasitic nematode *Meloidogyne incognita*. *Nat. Biotechnol.* **26**:909–915. <https://doi.org/10.1038/nbt.1482>.
- Ayadi, M., Delaporte, V., Li, Y.F., and Zhou, D.X. (2004). Analysis of GT-3a identifies a distinct subgroup of trihelix DNA-binding transcription factors in *Arabidopsis*. *FEBS Lett.* **562**:147–154. [https://doi.org/10.1016/S0014-5793\(04\)00222-4](https://doi.org/10.1016/S0014-5793(04)00222-4).
- Baldacci-Cresp, F., Behr, M., Kohler, A., Badalato, N., Morreel, K., Goeminne, G., Mol, A., de Almeida Engler, J., Boerjan, W., El Jaziri, M., and Baucher, M. (2020). Molecular changes concomitant with vascular system development in mature galls induced by root-knot nematodes in the model tree host *Populus tremula* × *P. alba*. *Int. J. Mol. Sci.* **21**:406. <https://doi.org/10.3390/ijms21020406>.
- Barcala, M., García, A., Cabrera, J., Casson, S., Lindsey, K., Favory, B., García-Casado, G., Solano, R., Fenoll, C., and Escobar, C. (2010). Early transcriptomic events in microdissected *Arabidopsis* nematode-induced giant cells. *Plant J.* **61**:698–712. <https://doi.org/10.1111/j.1365-313X.2009.04098.x>.
- Bartlem, D.G., Jones, M.G.K., and Hammes, U.Z. (2014). Vascularization and nutrient delivery at root-knot nematode feeding sites in host roots. *J. Exp. Bot.* **65**:1789–1798. <https://doi.org/10.1093/jxb/ert415>.
- Cabrera, J., Barcala, M., Fenoll, C., and Escobar, C. (2014a). Transcriptomic signatures of transfer cells in early developing nematode feeding cells of *Arabidopsis* focused on auxin and ethylene signaling. *Front. Plant Sci.* **5**:107. <https://doi.org/10.3389/fpls.2014.00107>.
- Cabrera, J., Díaz-Manzano, F.E., Sanchez, M., Rosso, M.N., Melillo, T., Goh, T., Fukaki, H., Cabello, S., Hofmann, J., Fenoll, C., and Escobar, C. (2014b). A role for *LATERAL ORGAN BOUNDARIES-DOMAIN 16* during the interaction *Arabidopsis-Meloidogyne* spp. provides a molecular link between lateral root and root-knot nematode feeding site development. *New Phytol.* **203**:632–645. <https://doi.org/10.1111/nph.12826>.
- Caillaud, M.C., Dubreuil, G., Quentin, M., Perfus-Barbeoch, L., Lecomte, P., de Almeida Engler, J., Abad, P., Rosso, M.N., and Favory, B. (2008). Root-knot nematodes manipulate plant cell functions during a compatible interaction. *J. Plant Physiol.* **165**:104–113. <https://doi.org/10.1016/j.jplph.2007.05.007>.
- Chhabra, S., Chang, S.C., Nguyen, H.M., Huq, R., Tanner, M.R., Londono, L.M., Estrada, R., Dhawan, V., Chauhan, S., Upadhyay, S.K., et al. (2014). Kv1.3 channel-blocking immunomodulatory peptides from parasitic worms: implications for autoimmune diseases. *Faseb. J.* **28**:3952–3964. <https://doi.org/10.1096/fj.14-251967>.
- Clough, S.J., and Bent, A.F. (1998). Floral dip: a simplified method for *Agrobacterium*-mediated transformation of *Arabidopsis thaliana*. *Plant J.* **16**:735–743. <https://doi.org/10.1046/j.1365-313x.1998.00343.x>.
- Dafny-Yelin, M., Chung, S.M., Frankman, E.L., and Tzfira, T. (2007). pSAT RNA interference vectors: A modular series for multiple gene down-regulation in plants. *Plant Physiol.* **145**:1272–1281. <https://doi.org/10.1104/pp.107.106062>.



- Eichmann, R., Richards, L., and Schäfer, P.** (2021). Hormones as go-betweens in plant microbiome assembly. *Plant J.* **105**:518–541. <https://doi.org/10.1111/tpj.15135>.
- Escobar, C., Brown, S., and Mitchum, M.G.** (2011). Transcriptomic and Proteomic Analysis of the Plant Response to Nematode Infection. In *Genomics and Molecular Genetics of Plant-Nematode Interactions*, J. Jones, G. Gheysen, and C.C. Fenoll, eds. (Springer Netherlands), pp. 157–173. [https://doi.org/10.1007/978-94-007-0434-3\\_9](https://doi.org/10.1007/978-94-007-0434-3_9).
- Farmer, L.M., Book, A.J., Lee, K.H., Lin, Y.L., Fu, H., and Vierstra, R.D.** (2010). The RAD23 family provides an essential connection between the 26S proteasome and ubiquitylated proteins in *Arabidopsis*. *Plant Cell* **22**:124–142. <https://doi.org/10.1105/tpc.109.072660>.
- Favery, B., Dubreuil, G., Chen, M.S., Giron, D., and Abad, P.** (2020). Gall-inducing parasites: Convergent and conserved strategies of plant manipulation by insects and nematodes. *Annu. Rev. Phytopathol.* **58**:1–22. <https://doi.org/10.1146/annurev-phyto-010820-012722>.
- Favery, B., Lecomte, P., Gil, N., Bechtold, N., Bouchez, D., Dalmasso, A., and Abad, P.** (1998). RPE, a plant gene involved in early developmental steps of nematode feeding cells. *EMBO J.* **17**:6799–6811. <https://doi.org/10.1093/emboj/17.23.6799>.
- Fuller, V.L., Lilley, C.J., Atkinson, H.J., and Urwin, P.E.** (2007). Differential gene expression in *Arabidopsis* following infection by plant-parasitic nematodes *Meloidogyne incognita* and *Heterodera schachtii*. *Mol. Plant Pathol.* **8**:595–609. <https://doi.org/10.1111/j.1364-3703.2007.00416.x>.
- Gavrilić, S., Yan, Z., Jurkiewicz, A.M., Stougaard, J., and Markmann, K.** (2016). Inoculation insensitive promoters for cell type enriched gene expression in legume roots and nodules. *Plant Methods* **12**:4. <https://doi.org/10.1186/s13007-016-0105-y>.
- Gheysen, G., and Mitchum, M.G.** (2019). Phytoparasitic nematode control of plant hormone pathways. *Plant Physiol.* **179**:1212–1226. <https://doi.org/10.1104/pp.18.01067>.
- Griffith, M.E., Mayer, U., Capron, A., Ngo, Q.A., Surendrarao, A., McClinton, R., Jürgens, G., and Sundaresan, V.** (2007). The *TORMOZ* gene encodes a nucleolar protein required for regulated division planes and embryo development in *Arabidopsis*. *Plant Cell* **19**:2246–2263. <https://doi.org/10.1105/tpc.106.042697>.
- Guo, Q., Major, I.T., and Howe, G.A.** (2018). Resolution of growth-defense conflict: mechanistic insights from jasmonate signaling. *Curr. Opin. Plant Biol.* **44**:72–81. <https://doi.org/10.1016/j.pbi.2018.02.009>.
- Hewezi, T., Juvele, P.S., Piya, S., Maier, T.R., Rambani, A., Rice, J.H., Mitchum, M.G., Davis, E.L., Hussey, R.S., and Baum, T.J.** (2015). The cyst nematode effector protein 10A07 targets and recruits host posttranslational machinery to mediate its nuclear trafficking and to promote parasitism in *Arabidopsis*. *Plant Cell* **27**:891–907. <https://doi.org/10.1105/tpc.114.135327>.
- Hewitson, J.P., Ivens, A.C., Harcus, Y., Filbey, K.J., McSorley, H.J., Murray, J., Bridgett, S., Ashford, D., Dowie, A.A., and Maizels, R.M.** (2013). Secretion of protective antigens by tissue-stage nematode larvae revealed by proteomic analysis and vaccination-induced sterile immunity. *PLoS Pathog.* **9**, e1003492. <https://doi.org/10.1371/journal.ppat.1003492>.
- Huang, G., Dong, R., Allen, R., Davis, E.L., Baum, T.J., and Hussey, R.S.** (2006). A root-knot nematode secretory peptide functions as a ligand for a plant transcription factor. *Mol. Plant Microbe Interact.* **19**:463–470. <https://doi.org/10.1094/MPMI-19-0463>.
- Huang, G., Gao, B., Maier, T., Allen, R., Davis, E.L., Baum, T.J., and Hussey, R.S.** (2003). A profile of putative parasitism genes expressed in the esophageal gland cells of the root-knot nematode *Meloidogyne incognita*. *Mol. Plant Microbe Interact.* **16**:376–381. <https://doi.org/10.1094/MPMI.2003.16.5.376>.
- Huot, B., Yao, J., Montgomery, B.L., and He, S.Y.** (2014). Growth-defense tradeoffs in plants: A balancing act to optimize fitness. *Mol. Plant* **7**:1267–1287. <https://doi.org/10.1093/mp/ssu049>.
- Jammes, F., Lecomte, P., de Almeida-Engler, J., Bitton, F., Martin-Magniette, M.L., Renou, J.P., Abad, P., and Favery, B.** (2005). Genome-wide expression profiling of the host response to root-knot nematode infection in *Arabidopsis*. *Plant J.* **44**:447–458. <https://doi.org/10.1111/j.1365-313X.2005.02532.x>.
- Jones, J.T., Haegeman, A., Danchin, E.G.J., Gaur, H.S., Helder, J., Jones, M.G.K., Kikuchi, T., Manzanilla-López, R., Palomares-Rius, J.E., Wesemael, W.M.L., and Perry, R.N.** (2013). Top 10 plant-parasitic nematodes in molecular plant pathology. *Mol. Plant Pathol.* **14**:946–961. <https://doi.org/10.1111/mpp.12057>.
- Joshi, I., Kumar, A., Kohli, D., Bhattacharya, R., Sirohi, A., Chaudhury, A., and Jain, P.K.** (2022). Gall-specific promoter, an alternative to the constitutive *CaMV35S* promoter, drives host-derived RNA interference targeting *Mi-msp2* gene to confer effective nematode resistance. *Front. Plant Sci.* **13**, 1007322. <https://doi.org/10.3389/fpls.2022.1007322>.
- Joshi, I., Kumar, A., Singh, A.K., Kohli, D., Raman, K.V., Sirohi, A., Chaudhury, A., and Jain, P.K.** (2019). Development of nematode resistance in *Arabidopsis* by HD-RNAi-mediated silencing of the effector gene *Mi-msp2*. *Sci. Rep.* **9**, 17404. <https://doi.org/10.1038/s41598-019-53485-8>.
- Kang, M., Lee, S., Abdelmageed, H., Reichert, A., Lee, H.K., Fokar, M., Mysore, K.S., and Allen, R.D.** (2017). *Arabidopsis* stress associated protein 9 mediates biotic and abiotic stress responsive ABA signaling via the proteasome pathway. *Plant Cell Environ.* **40**:702–716. <https://doi.org/10.1111/pce.12892>.
- Kaplan-Levy, R.N., Brewer, P.B., Quon, T., and Smyth, D.R.** (2012). The trihelix family of transcription factors-light, stress and development. *Trends Plant Sci.* **17**:163–171. <https://doi.org/10.1016/j.tplants.2011.12.002>.
- Kong, D., Li, C., Xue, W., Wei, H., Ding, H., Hu, G., Zhang, X., Zhang, G., Zou, T., Xian, Y., et al.** (2023). UB2/UB3/TSH4-anchored transcriptional networks regulate early maize inflorescence development in response to simulated shade. *Plant Cell* **35**:717–737. <https://doi.org/10.1093/plcell/koc352>.
- Lin, B., Zhuo, K., Wu, P., Cui, R., Zhang, L.H., and Liao, J.** (2013). A novel effector protein, MJ-NULG1a, targeted to giant cell nuclei plays a role in *Meloidogyne javanica* parasitism. *Mol. Plant Microbe Interact.* **26**:55–66. <https://doi.org/10.1094/MPMI-05-12-0114-FI>.
- Liu, S., Yuan, X., Wang, Y., Wang, H., Wang, J., Shen, Z., Gao, Y., Cai, J., Li, D., and Song, F.** (2019). Tomato stress-associated protein 4 contributes positively to immunity against necrotrophic fungus *Botrytis cinerea*. *Mol. Plant Microbe Interact.* **32**:566–582. <https://doi.org/10.1094/MPMI-04-18-0097-R>.
- Livak, K.J., and Schmittgen, T.D.** (2001). Analysis of relative gene expression data using real-time quantitative PCR and the  $2^{-\Delta\Delta CT}$  method. *Methods* **25**:402–408. <https://doi.org/10.1006/meth.2001.1262>.
- MacLean, A.M., Orlovskis, Z., Kowitwanich, K., Zdziarska, A.M., Angenent, G.C., Immink, R.G.H., and Hogenhout, S.A.** (2014). Phytoplasma effector SAP54 hijacks plant reproduction by degrading MADS-box proteins and promotes insect colonization in a RAD23-dependent manner. *PLoS Biol.* **12**, e1001835. <https://doi.org/10.1371/journal.pbio.1001835>.
- Mejias, J., Bazin, J., Truong, N.M., Chen, Y., Marteu, N., Bouteiller, N., Sawa, S., Crespi, M.D., Vaucheret, H., Abad, P., et al.** (2021). The root-knot nematode effector MiEFF18 interacts with the plant core spliceosomal protein SmD1 required for giant cell formation. *New Phytol.* **229**:3408–3423. <https://doi.org/10.1111/nph.17089>.
- Mejias, J., Chen, Y., Bazin, J., Truong, N.M., Mulet, K., Nouredine, Y., Jaubert-Possamai, S., Ranty-Roby, S., Soulé, S., Abad, P., et al.** (2022). Silencing the conserved small nuclear ribonucleoprotein



- Smd1 target gene alters susceptibility to root-knot nematodes in plants. *Plant Physiol.* **189**:1741–1756. <https://doi.org/10.1093/plphys/kiac155>.
- Niu, J., Liu, P., Liu, Q., Chen, C., Guo, Q., Yin, J., Yang, G., and Jian, H. (2016). Msp40 effector of root-knot nematode manipulates plant immunity to facilitate parasitism. *Sci. Rep.* **6**, 19443. <https://doi.org/10.1038/srep19443>.
- Nomura, K., Debroy, S., Lee, Y.H., Pumpllin, N., Jones, J., and He, S.Y. (2006). A bacterial virulence protein suppresses host innate immunity to cause plant disease. *Science* **313**:220–223. <https://doi.org/10.1126/science.1129523>.
- Olmo, R., Cabrera, J., Díaz-Manzano, F.E., Ruiz-Ferrer, V., Barcala, M., Ishida, T., García, A., Andrés, M.F., Ruiz-Lara, S., Verdugo, I., et al. (2020). Root-knot nematodes induce gall formation by recruiting developmental pathways of post-embryonic organogenesis and regeneration to promote transient pluripotency. *New Phytol.* **227**:200–215. <https://doi.org/10.1111/nph.16521>.
- Olmo, R., Cabrera, J., Fenoll, C., and Escobar, C. (2019). A role for *ALF4* during gall and giant cell development in the biotic interaction between *Arabidopsis* and *Meloidogyne* spp. *Physiol. Plantarum* **165**:17–28. <https://doi.org/10.1111/ppl.12734>.
- Olmo, R., Cabrera, J., Moreno-Risueno, M.A., Fukaki, H., Fenoll, C., and Escobar, C. (2017). Molecular transducers from roots are triggered in *Arabidopsis* leaves by root-knot nematodes for successful feeding site formation: A conserved post-embryonic *De novo* organogenesis program? *Front. Plant Sci.* **8**:875. <https://doi.org/10.3389/fpls.2017.00875>.
- Park, H.C., Kim, M.L., Kang, Y.H., Jeon, J.M., Yoo, J.H., Kim, M.C., Park, C.Y., Jeong, J.C., Moon, B.C., Lee, J.H., et al. (2004). Pathogen- and NaCl-induced expression of the SCaM-4 promoter is mediated in part by a GT-1 Box that interacts with a GT-1-like transcription factor. *Plant Physiol.* **135**:2150–2161. <https://doi.org/10.1104/pp.104.041442>.
- Pieterse, C.M.J., Pierik, R., and Van Wees, S.C.M. (2014). Different shades of JAZ during plant growth and defense. *New Phytol.* **204**:261–264. <https://doi.org/10.1111/nph.13029>.
- Portillo, M., Lindsey, K., Casson, S., García-Casado, G., Solano, R., Fenoll, C., and Escobar, C. (2009). Isolation of RNA from laser-capture-microdissected giant cells at early differentiation stages suitable for differential transcriptome analysis. *Mol. Plant Pathol.* **10**:523–535. <https://doi.org/10.1111/j.1364-3703.2009.00552.x>.
- Przybylska, A., and Szychalski, M. (2021). Changes in the expression level of genes encoding transcription factors and cell wall-related proteins during *Meloidogyne arenaria* infection of maize (*Zea mays*). *Mol. Biol. Rep.* **48**:6779–6786. <https://doi.org/10.1007/s11033-021-06677-3>.
- Qi, F., and Zhang, F. (2020). Cell cycle regulation in the plant response to stress. *Front. Plant Sci.* **10**:1765. <https://doi.org/10.3389/fpls.2019.01765>.
- Reitz, M.U., Gifford, M.L., and Schäfer, P. (2015). Hormone activities and the cell cycle machinery in immunity-triggered growth inhibition. *J. Exp. Bot.* **66**:2187–2197. <https://doi.org/10.1093/jxb/erv106>.
- Rich-Griffin, C., Eichmann, R., Reitz, M.U., Hermann, S., Woolley-Allen, K., Brown, P.E., Wiwatdirekku, K., Esteban, E., Pasha, A., Kogel, K.H., et al. (2020). Regulation of cell type-specific immunity networks in *Arabidopsis* roots. *Plant Cell* **32**:2742–2762. <https://doi.org/10.1105/tpc.20.00154>.
- Sato, K., Uehara, T., Holbein, J., Sasaki-Sekimoto, Y., Gan, P., Bino, T., Yamaguchi, K., Ichihashi, Y., Maki, N., Shigenobu, S., et al. (2021). Transcriptomic analysis of resistant and susceptible responses in a new model root-knot nematode infection system using *Solanum torvum* and *Meloidogyne arenaria*. *Front. Plant Sci.* **12**, 680151. <https://doi.org/10.3389/fpls.2021.680151>.
- Schiessl, K., Lilley, J.L.S., Lee, T., Tamvakis, I., Kohlen, W., Bailey, P.C., Thomas, A., Luptak, J., Ramakrishnan, K., Carpenter, M.D., et al. (2019). *NODULE INCEPTION* recruits the lateral root developmental program for symbiotic nodule organogenesis in *Medicago truncatula*. *Curr. Biol.* **29**:3657–3668.e5. <https://doi.org/10.1016/j.cub.2019.09.005>.
- Schindelin, J., Arganda-Carreras, I., Frise, E., Kaynig, V., Longair, M., Pietzsch, T., Preibisch, S., Rueden, C., Saalfeld, S., Schmid, B., et al. (2012). Fiji: an open-source platform for biological-image analysis. *Nat. Methods* **9**:676–682. <https://doi.org/10.1038/nmeth.2019>.
- Shukla, N., Yadav, R., Kaur, P., Rasmussen, S., Goel, S., Agarwal, M., Jagannath, A., Gupta, R., and Kumar, A. (2018). Transcriptome analysis of root-knot nematode (*Meloidogyne incognita*)-infected tomato (*Solanum lycopersicum*) roots reveals complex gene expression profiles and metabolic networks of both host and nematode during susceptible and resistance responses. *Mol. Plant Pathol.* **19**:615–633. <https://doi.org/10.1111/mpp.12547>.
- Song, H., Lin, B., Huang, Q., Sun, T., Wang, W., Liao, J., and Zhuo, K. (2021). The *Meloidogyne javanica* effector Mj2G02 interferes with jasmonic acid signalling to suppress cell death and promote parasitism in *Arabidopsis*. *Mol. Plant Pathol.* **22**:1288–1301. <https://doi.org/10.1111/mpp.13111>.
- Soyano, T., Shimoda, Y., Kawaguchi, M., and Hayashi, M. (2019). A shared gene drives lateral root development and root nodule symbiosis pathways in *Lotus*. *Science* **366**:1021–1023. <https://doi.org/10.1126/science.aax2153>.
- Strader, L., Weijers, D., and Wagner, D. (2022). Plant transcription factors-being in the right place with the right company. *Curr. Opin. Plant Biol.* **65**, 102136. <https://doi.org/10.1016/j.pbi.2021.102136>.
- Suzuki, R., Kanno, Y., Abril-Urias, P., Seo, M., Escobar, C., Tsai, A.Y.L., and Sawa, S. (2022). Local auxin synthesis mediated by YUCCA4 induced during root-knot nematode infection positively regulates gall growth and nematode development. *Front. Plant Sci.* **13**, 1019427. <https://doi.org/10.3389/fpls.2022.1019427>.
- Suzuki, R., Yamada, M., Higaki, T., Aida, M., Kubo, M., Tsai, A.Y.L., and Sawa, S. (2021). *PUCH1* regulates giant cell morphology during root-knot nematode infection in *Arabidopsis thaliana*. *Front. Plant Sci.* **12**, 755610. <https://doi.org/10.3389/fpls.2021.755610>.
- Thein, M.C., Winter, A.D., Stepek, G., McCormack, G., Stapleton, G., Johnstone, I.L., and Page, A.P. (2009). Combined extracellular matrix cross-linking activity of the peroxidase MLT-7 and the dual oxidase BLI-3 is critical for post-embryonic viability in *Caenorhabditis elegans*. *J. Biol. Chem.* **284**:17549–17563. <https://doi.org/10.1074/jbc.M900831200>.
- Tian, F., Yang, D.C., Meng, Y.Q., Jin, J., and Gao, G. (2019). PlantRegMap: charting functional regulatory maps in plants. *Nucleic Acids Res.* **48**:D1104–D1113. <https://doi.org/10.1093/nar/gkz1020>.
- Torres-Martínez, H.H., Rodríguez-Alonso, G., Shishkova, S., and Dubrovsky, J.G. (2019). Lateral root primordium morphogenesis in angiosperms. *Front. Plant Sci.* **10**:206. <https://doi.org/10.3389/fpls.2019.00206>.
- Tudor, J.E., Pallaghy, P.K., Pennington, M.W., and Norton, R.S. (1996). Solution structure of ShK toxin, a novel potassium channel inhibitor from a sea anemone. *Nat. Struct. Biol.* **3**:317–320. <https://doi.org/10.1038/nsb0496-317>.
- Üstüner, S., Schäfer, P., and Eichmann, R. (2022). Development specifies, diversifies and empowers root immunity. *EMBO Rep.* **23**:e55631. <https://doi.org/10.15252/embr.202255631>.
- Waese, J., Fan, J., Pasha, A., Yu, H., Fucile, G., Shi, R., Cumming, M., Kelley, L.A., Sternberg, M.J., Krishnakumar, V., et al. (2017). ePlant: Visualizing and exploring multiple levels of data for hypothesis generation in plant biology. *Plant Cell* **29**:1806–1821. <https://doi.org/10.1105/tpc.17.00073>.

## Plant Communications

- Walter, M., Chaban, C., Schütze, K., Batistic, O., Weckermann, K., Näke, C., Blazevic, D., Grefen, C., Schumacher, K., Oecking, C., et al. (2004). Visualization of protein interactions in living plant cells using bimolecular fluorescence complementation. *Plant J.* **40**:428–438. <https://doi.org/10.1111/j.1365-313X.2004.02219.x>.
- Wang, K., He, J., Zhao, Y., Wu, T., Zhou, X., Ding, Y., Kong, L., Wang, X., Wang, Y., Li, J., et al. (2018). EAR1 Negatively Regulates ABA Signaling by Enhancing 2C Protein Phosphatase Activity. *Plant Cell* **30**:815–834. <https://doi.org/10.1105/tpc.17.00875>.
- Warmerdam, S., Sterken, M.G., van Schaik, C., Oortwijn, M.E.P., Sukarta, O.C.A., Lozano-Torres, J.L., Dicke, M., Helder, J., Kammenga, J.E., Goverse, A., et al. (2018). Genome-wide association mapping of the architecture of susceptibility to the root-knot nematode *Meloidogyne incognita* in *Arabidopsis thaliana*. *New Phytol.* **218**:724–737. <https://doi.org/10.1111/nph.15034>.
- Yamaguchi, Y.L., Suzuki, R., Cabrera, J., Nakagami, S., Sagara, T., Ejima, C., Sano, R., Aoki, Y., Olmo, R., Kurata, T., et al. (2017). Root-knot and cyst nematodes activate procambium-associated genes in *Arabidopsis* roots. *Front. Plant Sci.* **8**:1195. <https://doi.org/10.3389/fpls.2017.01195>.
- Zhang, L., Davies, L.J., and Elling, A.A. (2015). A *Meloidogyne incognita* effector is imported into the nucleus and exhibits transcriptional activation activity *in planta*. *Mol. Plant Pathol.* **16**:48–60. <https://doi.org/10.1111/mp.12160>.
- Zhang, Q., Zhong, T., E, L., Xu, M., Dai, W., Sun, S., and Ye, J. (2021). GT factor ZmGT-3b is associated with regulation of photosynthesis and defense response to *Fusarium graminearum* infection in maize seedling. *Front. Plant Sci.* **12**, 724133. <https://doi.org/10.3389/fpls.2021.724133>.
- Zhao, J., Li, L., Liu, Q., Liu, P., Li, S., Yang, D., Chen, Y., Pagnotta, S., Favery, B., Abad, P., and Jian, H. (2019). A MIF-like effector suppresses plant immunity and facilitates nematode parasitism by interacting with plant annexins. *J. Exp. Bot.* **70**:5943–5958. <https://doi.org/10.1093/jxb/erz348>.
- Zhao, J., Sun, Q., Quentin, M., Ling, J., Abad, P., Zhang, X., Li, Y., Yang, Y., Favery, B., Mao, Z., and Xie, B. (2021). A *Meloidogyne incognita* C-type lectin effector targets plant catalases to promote parasitism. *New Phytol.* **232**:2124–2137. <https://doi.org/10.1111/nph.17690>.
- Zhu, Y., Yuan, G., Zhao, R., An, G., Li, W., Si, W., Liu, J., and Sun, D. (2022). Comparative transcriptome analysis reveals differential gene expression in resistant and susceptible watermelon varieties in response to *Meloidogyne incognita*. *Life* **12**:1003. <https://doi.org/10.3390/life12071003>.

**Plant Communications, Volume 5**

**Supplemental information**

**The root-knot nematode effector Mi2G02 hijacks a host plant trihelix transcription factor to promote nematode parasitism**

**Jianlong Zhao, Kaiwei Huang, Rui Liu, Yuqing Lai, Pierre Abad, Bruno Favery, Heng Jian, Jian Ling, Yan Li, Yuhong Yang, Bingyan Xie, Michaël Quentin, and Zhenchuan Mao**

## Supplemental Information

### A root-knot nematode effector Mi2G02 hijacks a host plant trihelix transcription factor for nematode parasitism

Jianlong Zhao<sup>1,4,\*</sup>, Kaiwei Huang<sup>1,4</sup>, Rui Liu<sup>1,4</sup>, Yuqing Lai<sup>1</sup>, Pierre Abad<sup>2</sup>, Bruno Favery<sup>2</sup>, Heng Jian<sup>3</sup>, Jian Ling<sup>1</sup>, Yan Li<sup>1</sup>, Yuhong Yang<sup>1</sup>, Bingyan Xie<sup>1</sup>, Michaël Quentin<sup>2,\*</sup> and Zhenchuan Mao<sup>1,\*</sup>

<sup>1</sup> State Key Laboratory of Vegetable Biobreeding, Institute of Vegetables and Flowers, Chinese Academy of Agricultural Sciences, 100081, Beijing, China

<sup>2</sup> INRAE, Université Côte d'Azur, CNRS, ISA, F-06903, Sophia Antipolis, France

<sup>3</sup> Department of Plant Pathology and Key Laboratory of Pest Monitoring and Green Management of the Ministry of Agriculture, China Agricultural University, 100193, Beijing, China

<sup>4</sup> These authors contributed equally: Jianlong Zhao, Kaiwei Huang, Rui Liu.

\* **Corresponding:** Email: Jianlong Zhao ([zhaojianlong@caas.cn](mailto:zhaojianlong@caas.cn)), Michaël Quentin ([michael.quentin@inrae.fr](mailto:michael.quentin@inrae.fr)), Zhenchuan Mao ([maozhenchuan@caas.cn](mailto:maozhenchuan@caas.cn)).



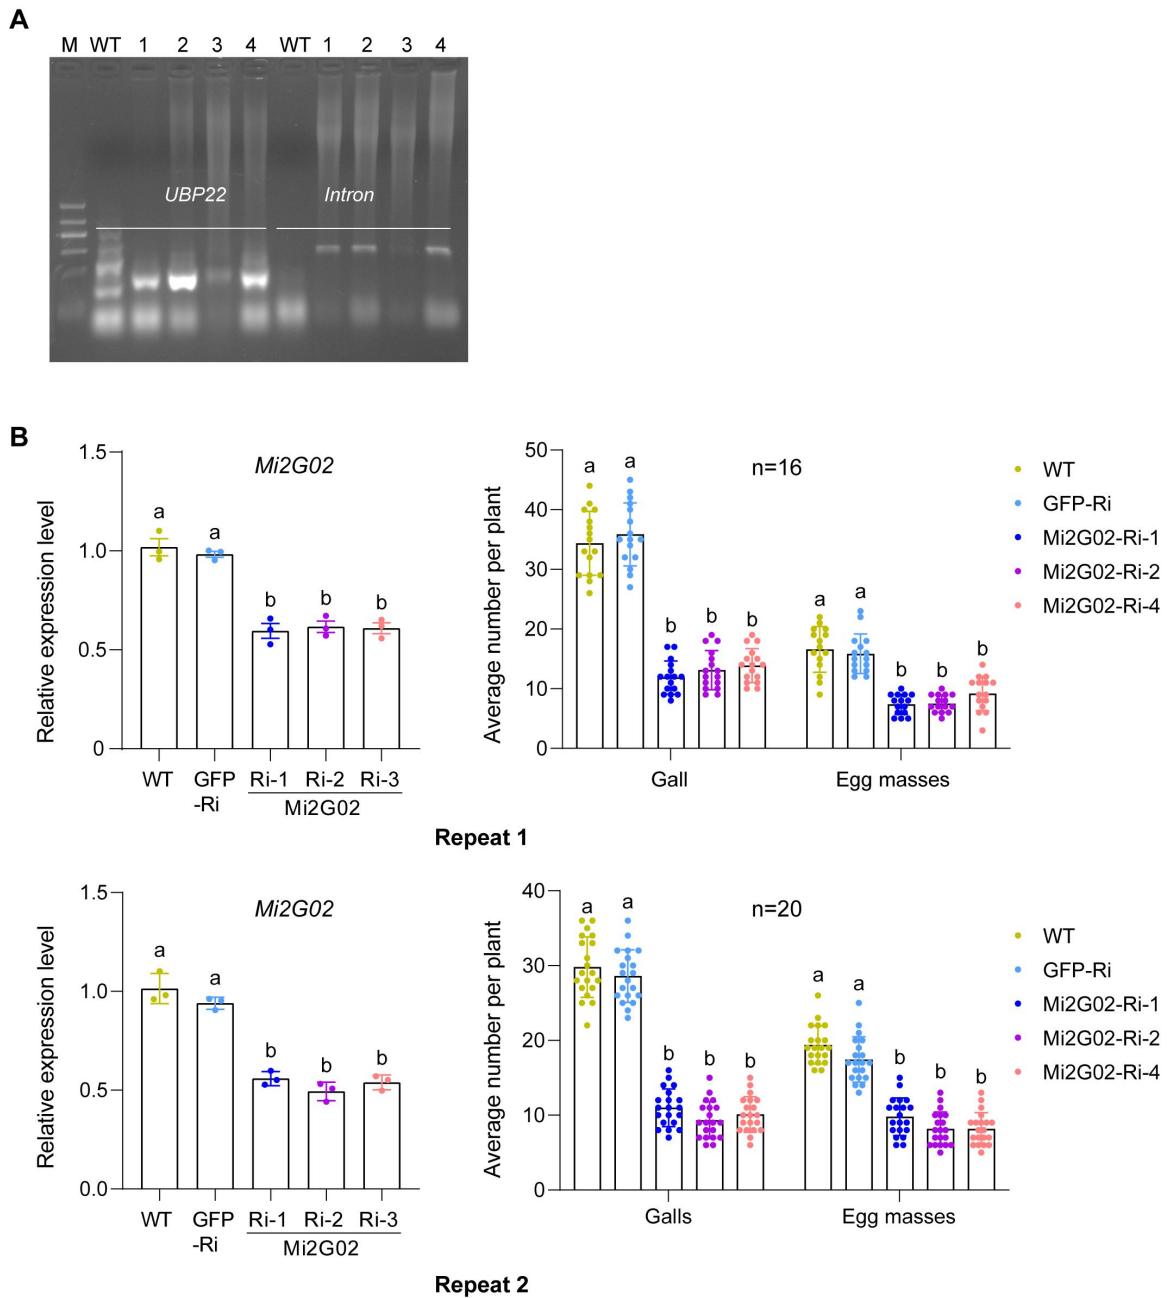

**Supplemental Figure 1.** Verification of the homozygous *Mi2G02* RNAi *Arabidopsis thaliana* lines and analysis of their susceptibility to *Meloidogyne incognita*.

**(A)** PCR was performed to verify intron expression using genomic DNA from wild-type (WT) and four independent *Mi2G02* RNAi *A. thaliana* lines (1, *Mi2G02*-

Ri-1; 2, Mi2G02-Ri-2; 3, Mi2G02-Ri-3; 4, Mi2G02-Ri-4). *UBP22* (*AT5G10790*) was used as an internal control.

**(B)** Two independent nematode infection assays using *Mi2G02* RNAi *A. thaliana* lines. *Mi2G02* expression level in nematodes recovered from three homozygous RNAi lines (Mi2G02-Ri-1, Mi2G02-Ri-2 and Mi2G02-Ri-4), gfp-RNAi line (GFP-Ri) and wild-type (WT) were determined at 10 days post-infection (dpi) with *M. incognita* by RT-qPCR. *GAPDH* was used as an internal control. The values shown are means  $\pm$  SE (n = 3). Gall numbers and egg masses were counted at 35 dpi. Values are presented as means  $\pm$  SD (n=16 or n=20). Different letters indicate significant differences ( $P < 0.05$ , one-way ANOVA).

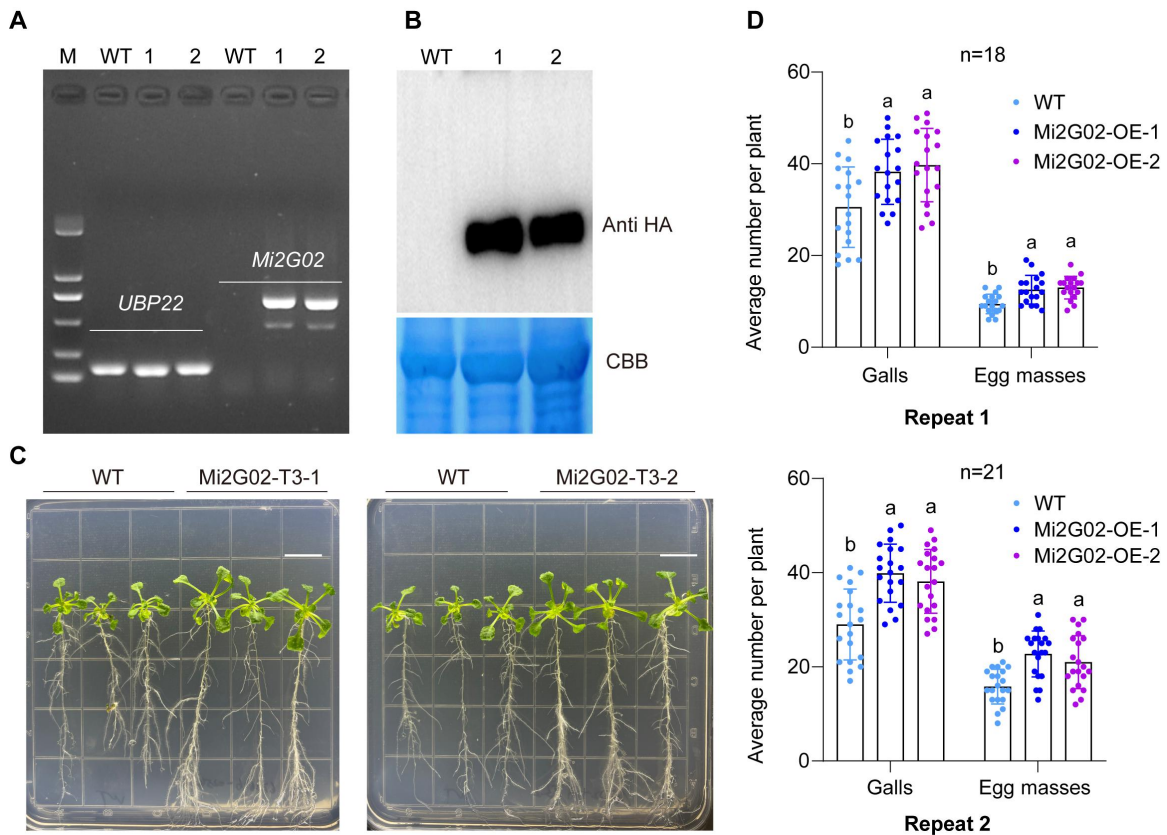

**Supplemental Figure 2.** Verification of the homozygous *Mi2G02*-expressing *A. thaliana* lines and analysis of their susceptibility to *M. incognita*.

**(A)** Semi-quantitative RT-PCR was performed to verify *Mi2G02* expression using cDNA of wild-type and two homozygous *Mi2G02*-expressing *A. thaliana* lines (1, *Mi2G02-T3-1*; 2, *Mi2G02-T3-2*). *UBP22* (*AT5G10790*) was used as an internal control.

**(B)** Western-blot using anti-HA antibody was conducted to verify *Mi2G02*-HA expression in *Mi2G02-T3-1* and *Mi2G02-T3-2*. CBB, coomassie brilliant blue, was used to check protein samples loading.

**(C)** Root phenotypes of *Mi2G02*-expressing *A. thaliana* lines compared with wild-type plants (WT) under normal growth conditions. The photographs were taken after 14 days. The experiments were repeated three times with similar results, representative pictures are shown. Scale bars, 1 cm.

**(D)** Two independent nematode infection assays using *Mi2G02*-expressing *A. thaliana* lines. Gall numbers and egg masses were counted at 35 dpi. Values are

presented as means  $\pm$  SD (n=18 or n=21). Different letters indicate significant differences ( $P<0.05$ , one-way ANOVA).



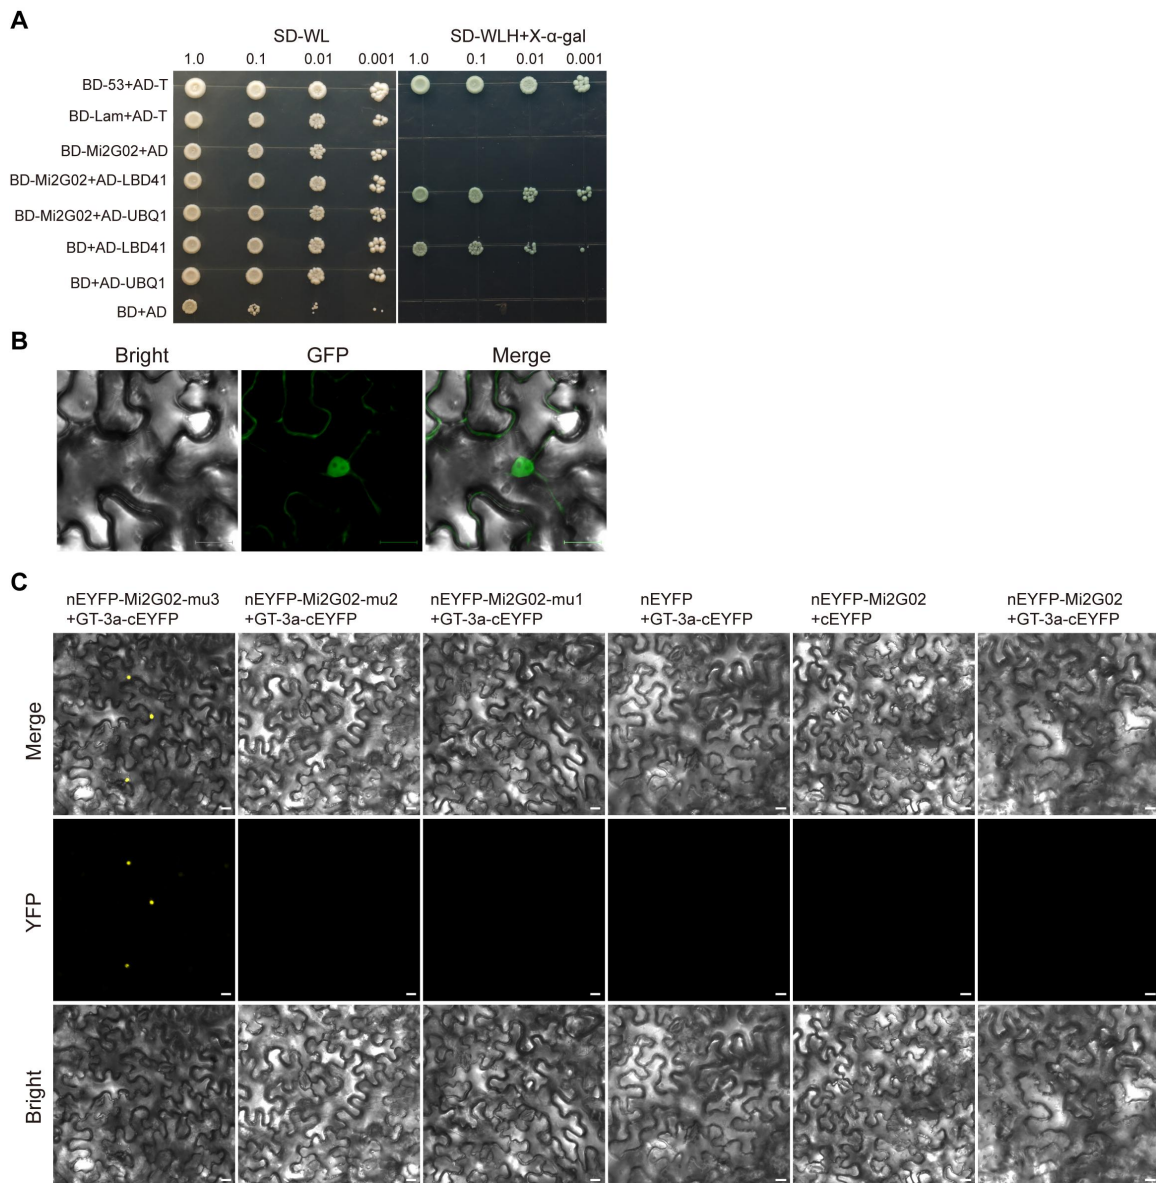

**Supplemental Figure 3.** Interactions verification between Mi2G02 and GT-3a.

**(A)** Autoactivation of LBD41, and GT-3a could not interact with UBQ1 in yeast system. Pairwise yeast two-hybrid (Y2H) tests were performed to investigate the interactions between Mi2G02 and LBD41 or UBQ1. Left column, yeast cell growth carrying the baits in pGBKT7 vector (BD) and preys in pGADT7 (AD) grown on SD/-Trp-Leu (SD-WL) medium indicating successful transformation of the yeast with both plasmids; right column, yeast cell growth on the selective dropout medium (SD/-Trp-Leu-His, SD-WLH) following the addition of 20 mg/ml

X- $\alpha$ -gal indicating protein interaction. Yeast cells containing p53 and SV40 large T-antigen were used as positive control, and yeast cells containing Lamin and SV40 large T-antigen were used as negative control.

**(B)** Subcellular localization of Mi2G02-ShKT-GFP in *N. benthamiana* leaf cells. Coding sequence of *Mi2G02-ShKT* was constructed into *ProSuper:GFP* (C-terminus GFP) vector. Mi2G02-ShKT-GFP was expressed in *Nicotiana benthamiana* leaf cells. The fluorescence signal was detected at 48 hours after infiltration. Images were captured by confocal microscopy (Zeiss LSM 700, Germany). GFP, green fluorescent protein. Scale bars, 20  $\mu$ m.

**(C)** Bimolecular fluorescence complementation (BiFC) experiments demonstrate the interaction between Mi2G02 and GT-3a. *N. benthamiana* leaf epidermal cells were transformed with different combinations of nEYFP- and cEYFP-fusion vectors. Images were obtained 48 h after co-expression. Yellow Fluorescent Protein (YFP) fluorescence signals were observed in the nuclei in leaves co-infiltrated with nEYFP-Mi2G02 and GT-3a-cEYFP. Scale bars, 20  $\mu$ m.

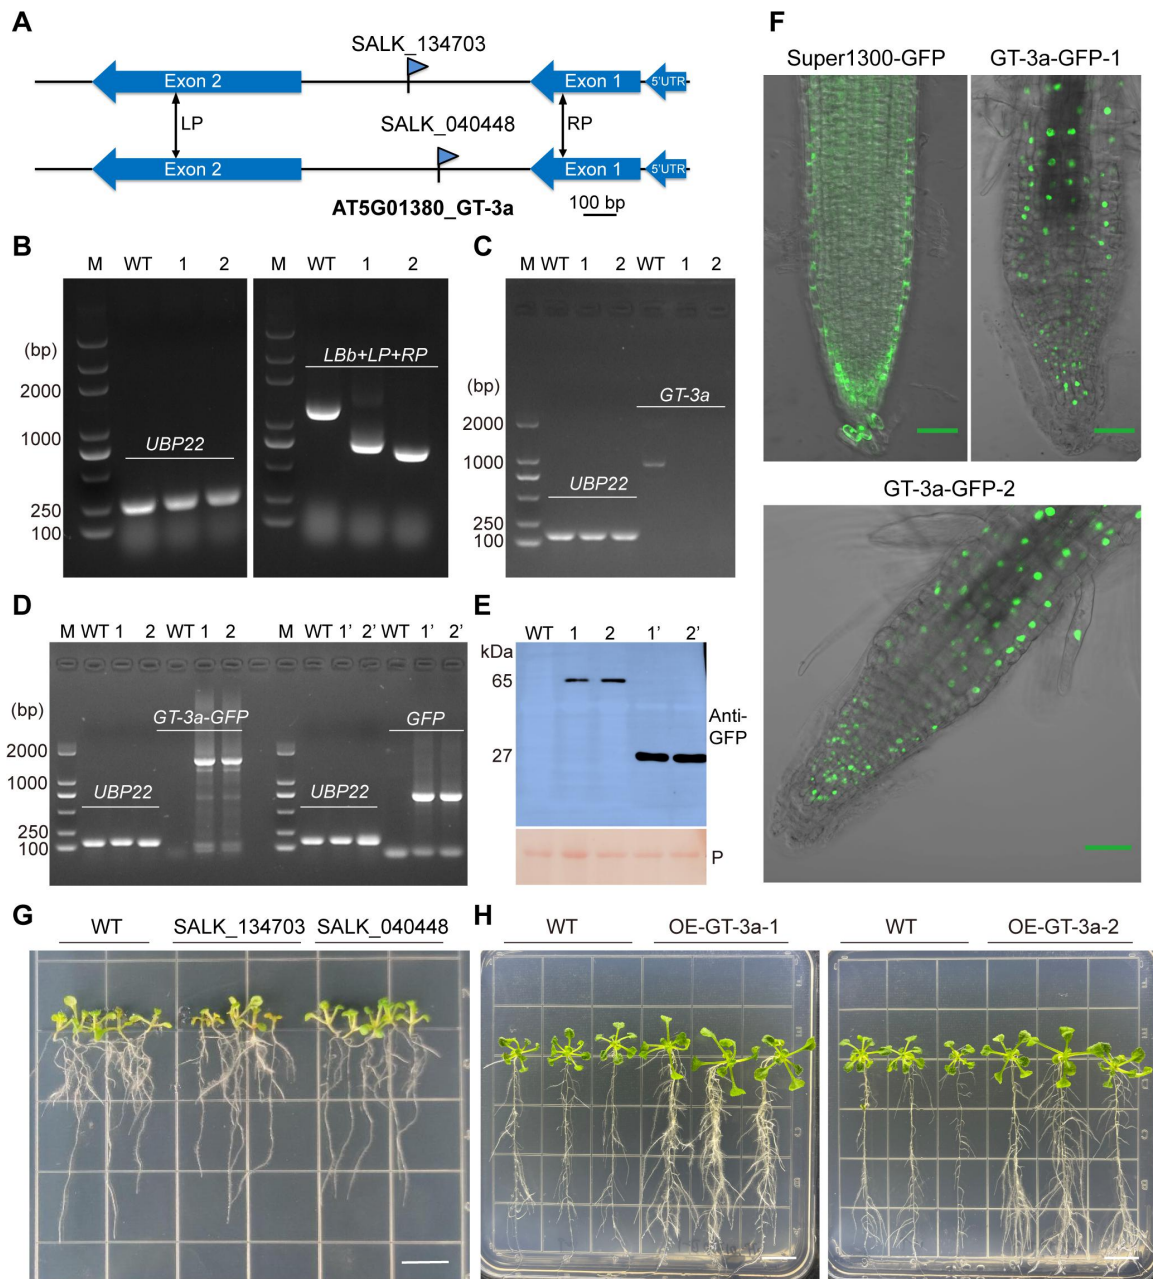

**Supplemental Figure 4.** Verification of the homozygous *gt-3a* T-DNA knockout mutants and *GT-3a*-overexpressing *A. thaliana* lines.

**(A)** Schematic representation of the two *gt-3a* T-DNA insertion mutants.

**(B)** PCR using genomic DNA was conducted to verify homozygous *gt-3a* KO mutants. 1, SALK\_134703; 2, SALK\_040448. *UBP22* (*AT5G10790*) was used as an internal control.

**(C)** Semi-quantitative RT-PCR using cDNA was conducted to verify homozygous *gt-3a* KO mutants. 1, SALK\_134703; 2, SALK\_040448. *UBP22* (*AT5G10790*) was used as an internal control.

**(D)** Semi-quantitative RT-PCR using cDNA was conducted to verify homozygous *GT-3a*- and *GFP*-overexpressing *A. thaliana* lines. 1, OE-GT-3a-1; 2, OE-GT-3a-2; 1', OE-GFP-1; 2', OE-GFP-2. *UBP22* (*AT5G10790*) was used as an internal control.

**(E)** Western blot using anti-GFP antibodies was conducted to verify GT-3a-GFP expression (predicted about 65 kDa) in OE-GT-3a-1 and OE-GT-3a-2, and GFP expression (predicted about 27 kDa) in OE-GFP-1 and OE-GFP-2. P, ponceau staining indicated loading control.

**(F)** Localization of the *ProSuper:GFP* and *ProSuper:GT-3a-GFP* fusions under the control of the *Super* promoter in *A. thaliana* roots. Scale bars, 50  $\mu$ m.

**(G and H)** Root phenotypes of *gt-3a* KO mutants and *GT-3a*-overexpressing *A. thaliana* lines compared with wild-type plants under normal conditions. The photographs were taken after 14 days. The experiments were repeated three times with similar results, representative pictures are shown. Scale bars, 1 cm.



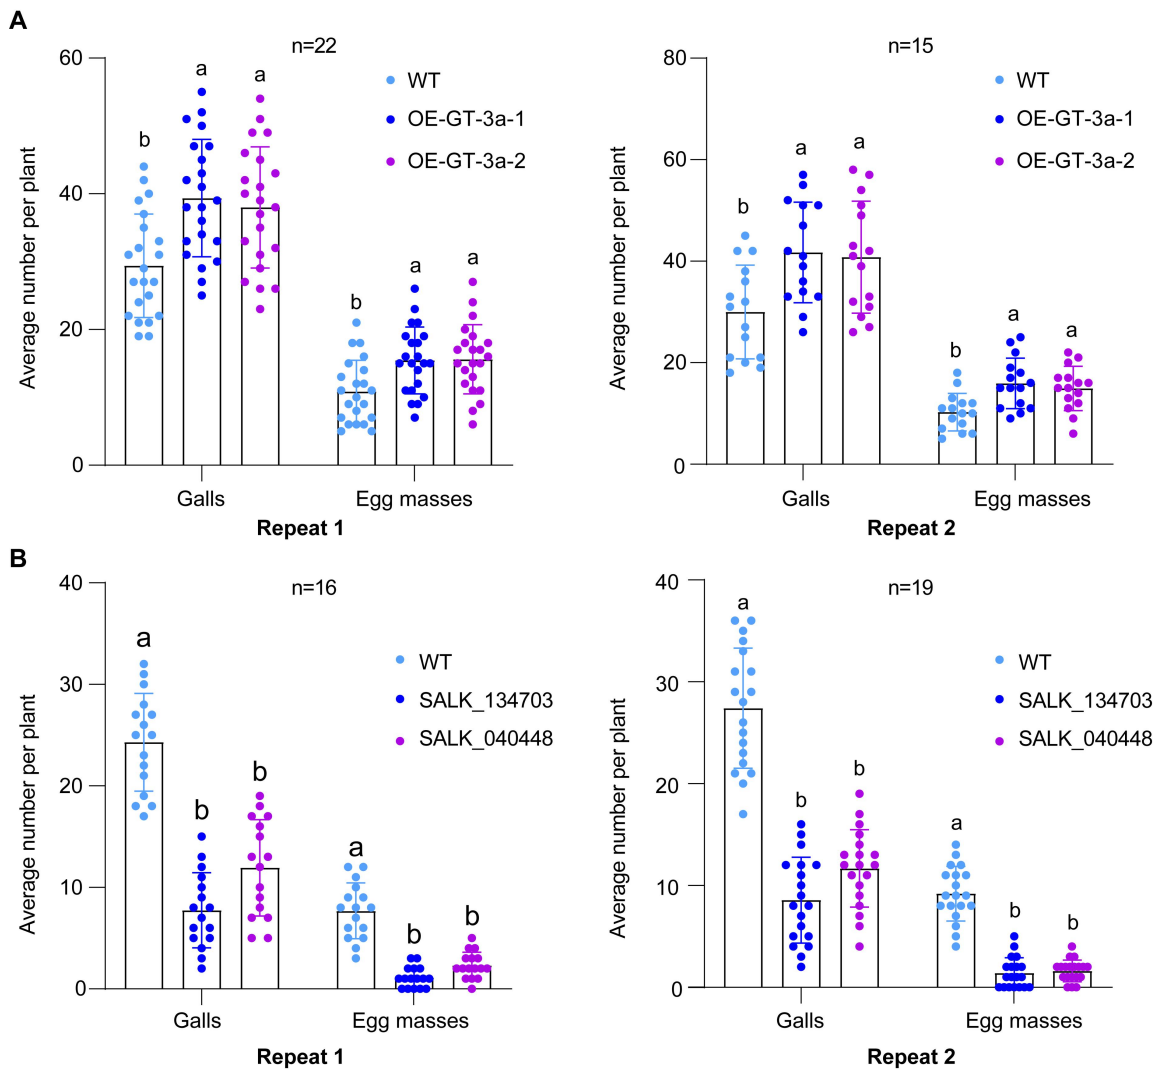

**Supplemental Figure 5.** Analysis of the susceptibility of the homozygous *GT-3a*-overexpressing *A. thaliana* lines and *gt-3a* T-DNA knockout mutant lines to *M. incognita*.

**(A)** Two independent nematode infection assays using *GT-3a* overexpressing *A. thaliana* lines were performed. Gall numbers and egg masses were counted at 35 dpi. Values are presented as means  $\pm$  SD (n=22 or n=15). Different letters indicate significant differences ( $P < 0.05$ , one-way ANOVA).

**(B)** Two independent nematode infection assays using *gt-3a* *A. thaliana* mutants. Galls and egg masses were counted at 35 dpi. Values are presented as means  $\pm$  SD (n=16 or n=19). Different letters indicate significant differences ( $P < 0.05$ , one-way ANOVA).

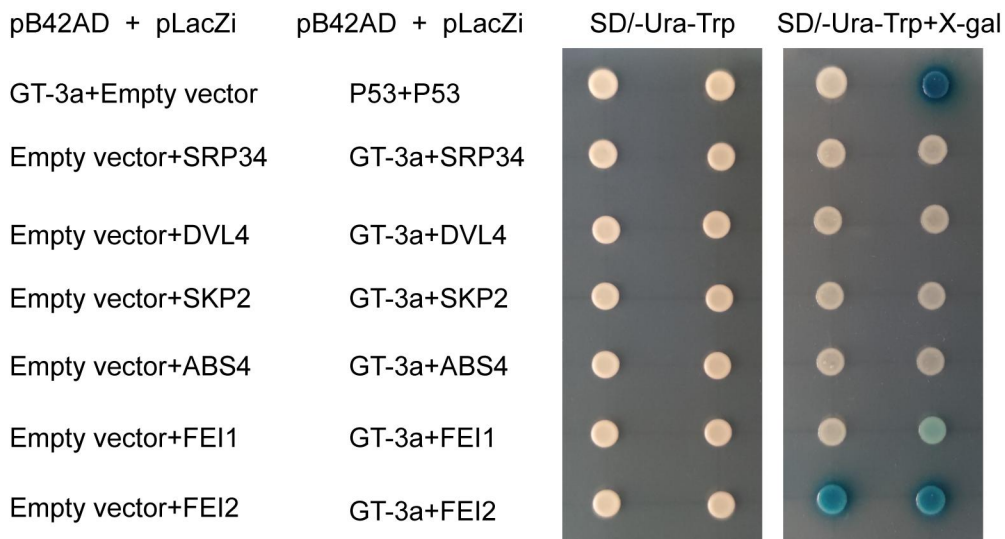

**Supplemental Figure 6.** Yeast one-hybrid (Y1H) assays verify targeting genes by GT-3a.

*FEI2* containing -CACGTG- motif showed self-activation in Y1H assays. Y1H results showed that GT-3a could bind to the promoter of *FEI1*, but the activity was low. Y1H experiments showed that GT-3a could not bind to the promoter of *SRP34*, *DVL4*, *SKP2*, *ABS4*. Promoter fragments containing -CACGTG- motif were cloned into pLacZi vector, GT-3a was cloned into pB42AD vector, and then pLacZi vector co-transformed with pB42AD-GT-3a into yeast strain EGY48. The yeast transformants were spotted on the plate SD/-Ura-Trp with or without 20 mg/ml X-gal.

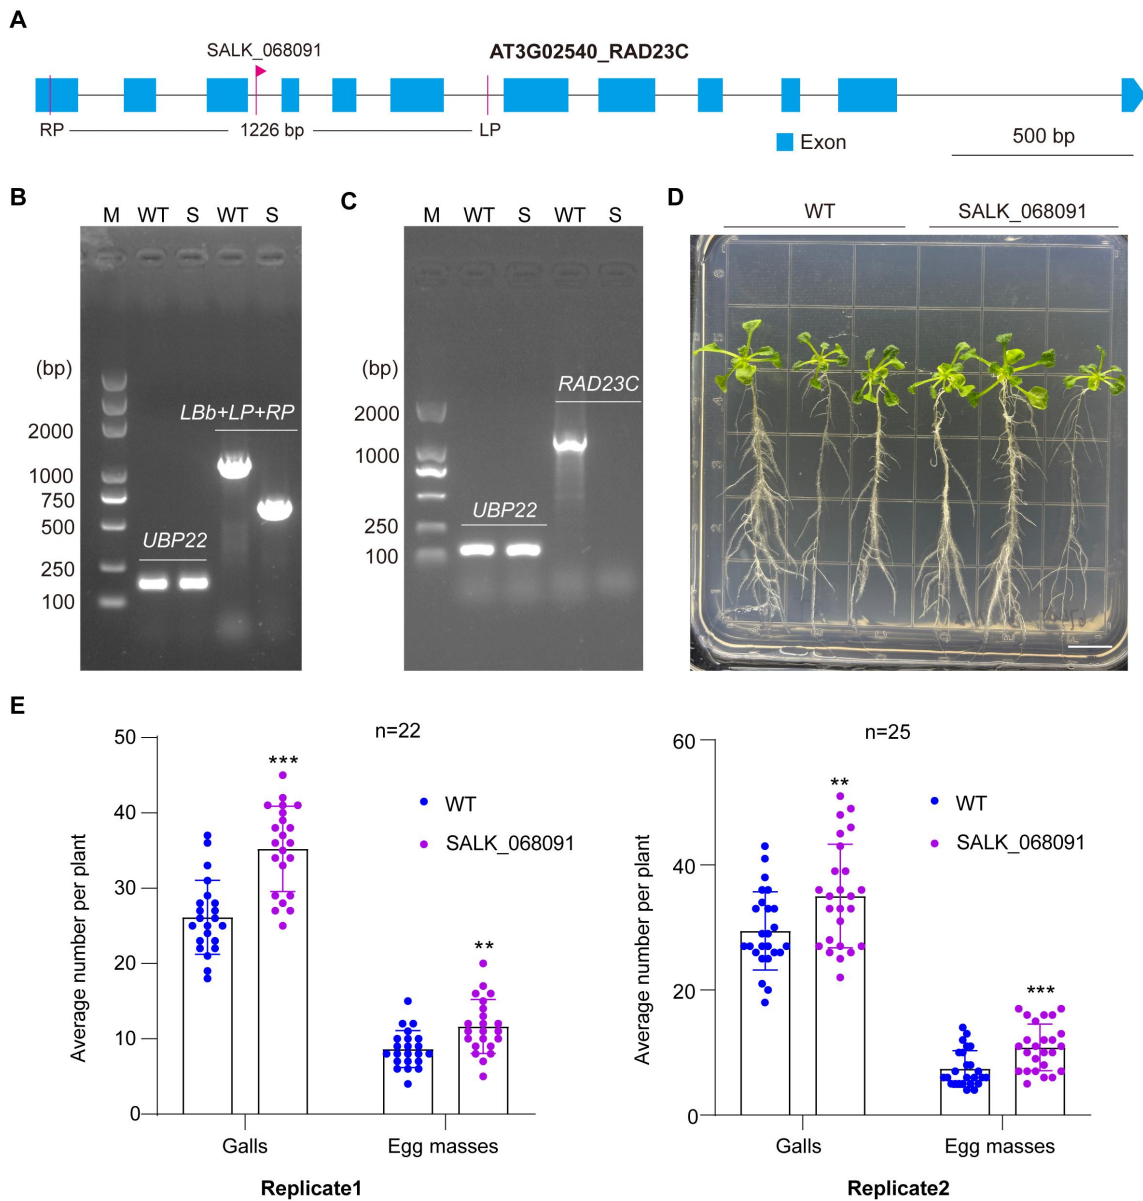

**Supplemental Figure 7.** Verification of the homozygous *rad23c* T-DNA knockout mutant *A. thaliana* line and phenotype.

**(A)** Schematic representation of T-DNA insertion *rad23c* mutants

(*SALK\_068091*). LP, RP indicate left and right genomic primers. The red triangle indicates the insertion site.

**(B)** PCR using genomic DNA was conducted to verify homozygous *rad23c* KO mutants. S, *SALK\_068091*. *UBP22* (*AT5G10790*) was used as an internal control.

**(C)** Semi-quantitative RT-PCR using cDNA was conducted to verify homozygous *rad23c* KO mutants. S, SALK\_068091. *UBP22* (*AT5G10790*) was used as an internal control.

**(D)** The *rad23c* mutants showed no significant difference of root phenotypes when compared with wild-type plants under normal growth conditions. The photographs were taken after 14 days, and a representative picture is shown. Scale bars, 1cm.

**(E)** The *rad23c* T-DNA knockout mutant is more susceptible than the wild type to *M. incognita*. The *rad23c* KO mutant (SALK\_068091) was inoculated with nematodes, and the numbers of galls and egg masses were counted 35 days post-inoculation. The data presented are the mean numbers per plant  $\pm$  SD ( $n=22$  or  $n=25$ ). Asterisks indicate differences that were significant in two-tailed Student's *t* tests, \*\* $P<0.01$ , \*\*\* $P<0.001$ .



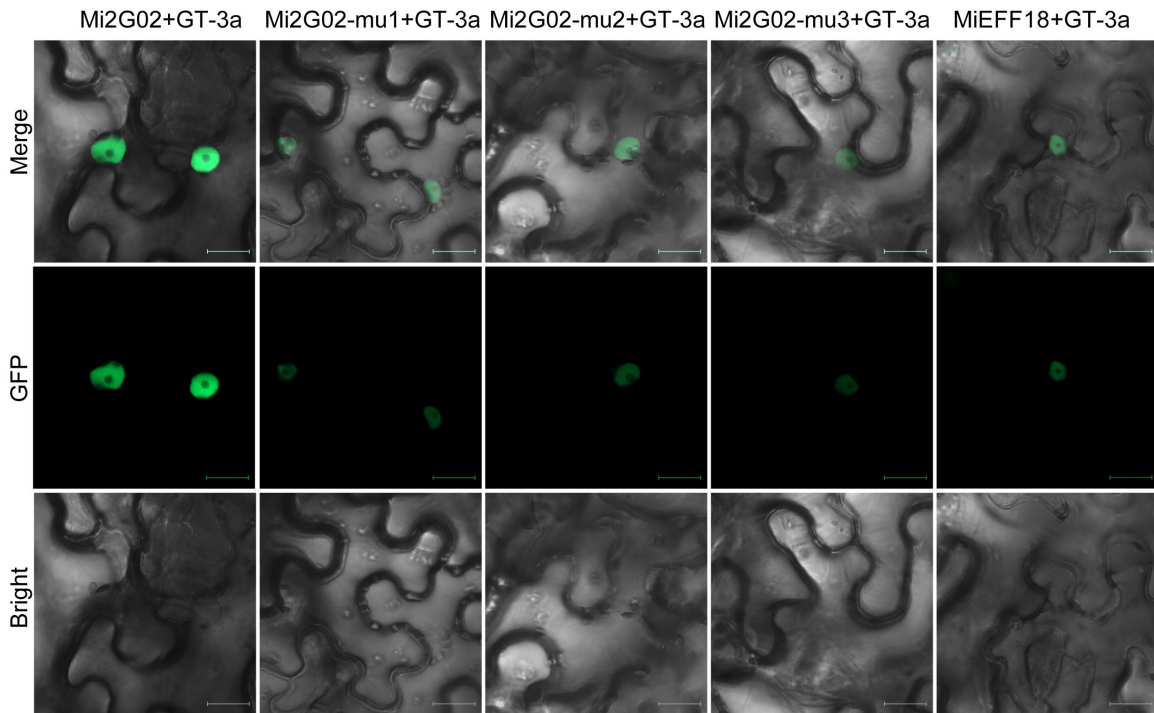

**Supplemental Figure 8.** Mi2G02 stabilizes the GT-3a-GFP fluorescence intensity.

*GT-3a* was co-expressed with *Mi2G02* or *GFP* in *N. benthamiana* leaves, and mutant *Mi2G02* and *MiEFF18* (a nuclear *M. incognita* effector not interacted with *GT-3a*) were used as controls. The *GT-3a*-GFP fluorescence was detected with confocal microscopy (LSM700, Zeiss) after 48 h post infiltration. GFP, green fluorescent protein. Scale bars, 20  $\mu$ m.

**Supplemental Table 1. *Arabidopsis thaliana* candidate proteins interacting with Mi2G02 identified by yeast two-hybrid assays.**

| Genes     | Functional annotation in TAIR                                                                                                                                            | Number of clones | In/Out of frame | Screening region       |
|-----------|--------------------------------------------------------------------------------------------------------------------------------------------------------------------------|------------------|-----------------|------------------------|
| AT5G01380 | Homeodomain-like superfamily protein, regulation of transcription                                                                                                        | 5                | In frame        | 14-210aa (1-323aa)     |
| AT3G52590 | <i>Arabidopsis thaliana</i> ubiquitin extension protein 1 mRNA involved in embryo development ending in seed dormancy, protein ubiquitination, translation               | 4                | In frame        | 5-108aa (1-128aa)      |
| AT3G02550 | <i>Arabidopsis thaliana</i> LOB domain-containing protein, regulation of transcription                                                                                   | 4                | In frame        | 91-263aa (1-263aa)     |
| AT1G61170 | <i>Arabidopsis thaliana</i> mRNA for hypothetical protein                                                                                                                | 2                | In frame        | 44-251aa (251aa)       |
| AT4G23650 | <i>Arabidopsis thaliana</i> calcium-dependent protein kinase 6 mRNA                                                                                                      | 2                | In frame        | 6-333aa (1-529aa)      |
| AT1G09070 | <i>Arabidopsis thaliana</i> uncharacterized protein mRNA, <i>Arabidopsis thaliana</i> At1g09070/F7G19_6 mRNA                                                             | 1                | In frame        | 1-277aa (1-324aa)      |
| AT1G28060 | <i>Arabidopsis thaliana</i> Pre-mRNA-splicing factor 3 mRNA                                                                                                              | 1                | In frame        | 1-308aa (1-786aa)      |
| AT1G28290 | <i>Arabidopsis thaliana</i> arabinogalactan protein 31 mRNA                                                                                                              | 1                | In frame        | 1-308aa (1-786aa)      |
| AT1G31970 | <i>Arabidopsis thaliana</i> stress response suppressor 1 mRNA                                                                                                            | 1                | In frame        | 1-250aa (1-537aa)      |
| AT1G56660 | MAEBL domain protein                                                                                                                                                     | 1                | Out of frame    |                        |
| AT2G37190 | <i>Arabidopsis thaliana</i> ribosomal protein L11 family protein mRNA, complete cds                                                                                      | 1                | In frame        | 1-166aa (1-166aa)      |
| AT3G01170 | <i>Arabidopsis thaliana</i> ribosomal protein L34e superfamily protein mRNA,                                                                                             | 1                | In frame        | 134-215aa (1-215aa)    |
| AT3G62240 | <i>Arabidopsis thaliana</i> RING/U-box domain-containing protein mRNA                                                                                                    | 1                | In frame        | 415-679aa (1-812aa)    |
| AT3G42660 | Ctf4 related nuclear protein. Interacts with LHP1-PRC2 to maintain H3K27 methylation in rapidly dividing cells. EOL1 expression is restricted to rapidly dividing cells. | 1                | In frame        | 156-533aa (1-953aa)    |
| AT3G53430 | <i>Arabidopsis thaliana</i> mRNA for 60S ribosomal Protein L12 -like                                                                                                     | 1                | Out of frame    |                        |
| AT4G38710 | <i>Arabidopsis thaliana</i> glycine-rich protein mRNA, translational initiation                                                                                          | 1                | In frame        | 1-215aa (1-452aa)      |
| AT5G38840 | <i>Arabidopsis thaliana</i> SMAD/FHA domain-containing protein mRNA                                                                                                      | 1                | In frame        | 2-304aa (1-735aa)      |
| AT5G42950 | <i>Arabidopsis thaliana</i> GYF domain-containing protein                                                                                                                | 1                | In frame        | 1088-1418aa (1-1714aa) |
| AT5G53000 | PP2A-associated protein with a possible function in the chilling response                                                                                                | 1                | In frame        | 1-220aa (1-405aa)      |
| AT5G56290 | <i>Arabidopsis thaliana</i> putative peroxisomal targeting signal type 1 receptor protein (At5g56290) mRNA                                                               | 1                | Out of frame    |                        |

**Supplemental Table 2. *Arabidopsis thaliana* candidate genes targeted by the GT-3a protein.**

| Genes     | Function predication in TAIR                                                                                                                                                                                                                                                      |
|-----------|-----------------------------------------------------------------------------------------------------------------------------------------------------------------------------------------------------------------------------------------------------------------------------------|
| AT1G02840 | ATSRP34, Splicing Factors (SR proteins).                                                                                                                                                                                                                                          |
| AT1G13245 | DVL4, negative regulation of cell population proliferation.                                                                                                                                                                                                                       |
| AT1G21410 | AtSKP2, positive regulation of cell division.                                                                                                                                                                                                                                     |
| AT1G31420 | FEI1. Encodes a plasma membrane localized leucine-rich repeat receptor kinase that is involved in cell wall elongation.                                                                                                                                                           |
| AT1G58340 | ABS4, encodes a plant MATE transporter that is localized to the Golgi complex and small organelles and is involved in determining the rate of organ initiation.                                                                                                                   |
| AT2G35620 | FEI2. Encodes a plasma membrane localized leucine-rich repeat receptor kinase that is involved in cell wall elongation.                                                                                                                                                           |
| AT3G02540 | RAD23C. Encodes a member of the RADIATION SENSITIVE23 (RAD23) family, RAD23 proteins play an essential role in the cell cycle.                                                                                                                                                    |
| AT5G16750 | TOZ. Encodes a nucleolar localized WD-40 repeat protein that is preferentially expressed in dividing cells and is required for regulated division planes and embryo development.                                                                                                  |
| AT5G56270 | WRKY2. Encodes WRKY transcription factor 2, a zinc-finger protein. In wrky2 mutants, egg cells polarize normally but zygotes fail to reestablish polar organelle positioning from a transient symmetric state, resulting in equal cell division and distorted embryo development. |

**Supplemental Table 3. Primers used in this research.**

| Primers for real-time quantitative PCR (RT-qPCR)                  |                                                    |
|-------------------------------------------------------------------|----------------------------------------------------|
| Primer name                                                       | Primer sequences (5'-3')                           |
| <i>QPCR-GT-3a-F</i>                                               | GGAAGTCGTGGCTGCTAAGAT                              |
| <i>QPCR-GT-3a-R</i>                                               | GAATGGGAACTGCTGCCTAAT                              |
| <i>QPCR-RAD23C-F</i>                                              | CAGAACCCAAACTTGATGCG                               |
| <i>QPCR-RAD23C-R</i>                                              | GCATTCGCCGCCGCCATTT                                |
| <i>QPCR-TOZ-F</i>                                                 | ATGGTTCTTTCATCGCCTGC                               |
| <i>QPCR-TOZ-R</i>                                                 | GACTCGCCTTCAATCGTGG                                |
| <i>QPCR-Mi2G02-F</i>                                              | ACGGCATCAACAATAACAACACC                            |
| <i>QPCR-Mi2G02-R</i>                                              | CACATTCGGTTGTCTCGGTTG                              |
| <i>GAPDH-F</i>                                                    | CGTGCAGCGGTTGAGAAGGA                               |
| <i>GAPDH-R</i>                                                    | GCGTCCGTGGGTGGAATCAT                               |
| Primers for vectors of luciferase complementation assay           |                                                    |
| Primer name                                                       | Primer sequences (5'-3')                           |
| <i>nluc-Mi2G02-F</i>                                              | acgggggacgagctcgggtaccATGGAATGTAGCGGAGATTGTTTC     |
| <i>nluc-Mi2G02-R</i>                                              | cgcgtacgagatctgggtcgac CAATTTAGCATGAATCTTAAC       |
| <i>cluc-GT-3a-F</i>                                               | tacgctccccggggcggtaccATGGACCGACGTAACCCTTTC         |
| <i>cluc-GT-3a-R</i>                                               | acgaaagctctgcaggtcgacTCAGAAACCTTGATTATGATGATC      |
| Primers for vectors of subcellular localization assay             |                                                    |
| Primer name                                                       | Primer sequences (5'-3')                           |
| <i>Mi2G02-GFP-F</i>                                               | aatactagtggatccgggtaccATGGAATGTAGCGGAGATTGTTTC     |
| <i>Mi2G02-GFP-R</i>                                               | gcccttgctcaccatgggtaccCAATTTAGCATGAATCTTAACTTTTCGG |
| <i>ShkT-GFP-F</i>                                                 | aatactagtggatccgggtaccATGGAATGTAGCGGAGATTGTTTC     |
| <i>ShkT-GFP-R</i>                                                 | gcccttgctcaccatgggtaccATGACAAACTTTACATTTCTTTGGA    |
| Primers for vectors of <i>Arabidopsis thaliana</i> transformation |                                                    |
| Primer name                                                       | Primer sequences (5'-3')                           |
| <i>GT-3a_super_F</i>                                              | aatactagtggatccgggtaccATGGACCGACGTAACCCTTTC        |
| <i>GT-3a_GFP_R</i>                                                | gcccttgctcaccatgggtaccGAAACCTTGATTATGATGATCATCATT  |
| <i>Mi2G02-HA-F</i>                                                | ctgcaggggccccgggtcgacATGGAATGTAGCGGAGATTGTTTC      |
| <i>Mi2G02-HA-R</i>                                                | aacatcgatgggtagggtaccCAATTTAGCATGAATCTTAACTTTTCGG  |
| Primers for identifying transgenic <i>Arabidopsis thaliana</i>    |                                                    |
| Primer name                                                       | Primer sequences (5'-3')                           |
| <i>GFP-F</i>                                                      | ATGGTGAGCAAGGGCGAG                                 |
| <i>GFP-R</i>                                                      | ACTTGTACAGCTCGTCCATGC                              |
| <i>Mi2G02-F</i>                                                   | ATGGAATGTAGCGGAGATTGTTCT                           |
| <i>Mi2G02-HA-R</i>                                                | TCAAGCGTAATCTGGAACATCGT                            |
| <i>GT-3a-F</i>                                                    | ATGGACCGACGTAACCCTTTC                              |
| <i>GT-3a-R</i>                                                    | CCTATTAAGCAAAGCATCGATGAGAG                         |



|                                                                 |                                                |
|-----------------------------------------------------------------|------------------------------------------------|
| <i>GT-3a-F</i>                                                  | ATGGACCGACGTAACCCTTTC                          |
| <i>GFP-R</i>                                                    | ACTTGTACAGCTCGTCCATGC                          |
| Primers for identifying T-DNA knockout mutant of <i>gt-3a</i>   |                                                |
| Primer name                                                     | Primer sequences (5'-3')                       |
| <i>SALK_134703_LP</i>                                           | TTCACCGTTTGCCTCATAAAC                          |
| <i>SALK_134703_RP</i>                                           | GAAGTCGTGGCTGCTAAGATG                          |
| <i>SALK_040448_LP</i>                                           | TTCACCGTTTGCCTCATAAAC                          |
| <i>SALK_040448_RP</i>                                           | GAAGTCGTGGCTGCTAAGATG                          |
| <i>LBb1.3</i>                                                   | ATTTTGCCGATTTGGAAC                             |
| Primers for constructing GUS vector                             |                                                |
| Primer name                                                     | Primer sequences (5'-3')                       |
| <i>PBI101-GT-3a-F</i>                                           | cttgcctgcctgcaggtgcacGATGGGAAATAAAAAGGATGATGAG |
| <i>PBI101-GT-3a-R</i>                                           | ggactgaccaccggggatccTATTTGGAATCGAATTGTCTTTGTG  |
| Primers for constructing prokaryotic expression vector          |                                                |
| Primer name                                                     | Primer sequences (5'-3')                       |
| <i>PET30a-GT-3a-F</i>                                           | gccatggctgatatcgatccATGGACCGACGTAACCCTTTC      |
| <i>PET30a-GT-3a-R</i>                                           | tgcggccgaagcttgcacGAAACCTTGATTATGATGATCATCATT  |
| Primers for identifying T-DNA knockout mutant of <i>rad23c</i>  |                                                |
| Primer name                                                     | Primer sequences (5'-3')                       |
| <i>SALK_068091-LP</i>                                           | ATTTTCGTACCGTCATGCAAC                          |
| <i>SALK_068091-RP</i>                                           | GCAGCCAACTCTTCATTCTTG                          |
| <i>LBb1.3</i>                                                   | ATTTTGCCGATTTGGAAC                             |
| Primers for identifying gene expression using cDNA              |                                                |
| Primer name                                                     | Primer sequences (5'-3')                       |
| <i>GT-3a-CDS-F</i>                                              | ATGGACCGACGTAACCCTTTC                          |
| <i>GT-3a-CDS-R</i>                                              | TTAGAAACCTTGATTATGATGATCATCA                   |
| <i>Mi2G02-CDS-F</i>                                             | ATGGAATGTAGCGGAGATTGTTC                        |
| <i>Mi2G02-CDS-R</i>                                             | TTACAATTTAGCATGAATCTTAACTTTTCG                 |
| <i>Mi2G02-CDS-F</i>                                             | ATGGAATGTAGCGGAGATTGTTC                        |
| <i>Mi2G02-CDS-R</i>                                             | TTACAATTTAGCATGAATCTTAACTTTTCG                 |
| Primers for constructing pSAT5 vector (host-derived RNAi)       |                                                |
| Primer name                                                     | Primer sequences (5'-3')                       |
| <i>Mi2G02-F1-NcoI-XbaI</i>                                      | CATGCCATGGTCTAGACTTATTCAACCGAGACAACCGA         |
| <i>Mi2G02-F1-XhoI</i>                                           | CCGCTCGAGTCATCTTCTTTGCGTCTTTGAA                |
| <i>Mi2G02-F2-PstI</i>                                           | AACTGCAGTCATCTTCTTTGCGTCTTTGAA                 |
| <i>Mi2G02-F2-KpnI</i>                                           | GGGGTACCCTTATTCAACCGAGACAACCGA                 |
| Primers for vectors of bimolecular fluorescence complementation |                                                |
| Primer name                                                     | Primer sequence (5'-3')                        |
| <i>Mi2G02-CE-SalI</i>                                           | ACGCGTCGAC ATGGAATGTAGCGGAGATTGTTC             |
| <i>Mi2G02-CE-XmaI</i>                                           | TCCCCCGGGCAATTTAGCATGAATCTTAAAC                |

|                                                |                                                      |
|------------------------------------------------|------------------------------------------------------|
| AT3G02550-CE-SalF                              | ACGCGTCGAC ATGCGGATGAGCTGTAATGG                      |
| AT3G02550-CE-XmaR                              | TCCCCCGGG GAGCATAAGCTCAGTCTTAC                       |
| AT3G52590-CE-SalF                              | ACGCGTCGAC ATGCAGATCTTCGTGAAAAC                      |
| AT3G52590-CE-XmaR                              | TCCCCCGGG CTTGATCTTCTTCTTAGGCC                       |
| GT-3a-CE-SalF                                  | ACGCGTCGAC ATGGACCGACGTAACCCTTTC                     |
| GT-3a-CE-XmaR                                  | TCCCCCGGG GAAACCTTGATTATGATGATC                      |
| Primers for vectors of yeast two-hybrid assays |                                                      |
| Primer name                                    | Primer sequence (5'-3')                              |
| <i>AD-52590-F</i>                              | gccatggaggccagtgaaattcATGCAGATCTTCGTGAAAACCTT        |
| <i>AD-52590-R</i>                              | cagctcgagctcgatggatccCTACTTGATCTTCTTCTTAGGCCTCA      |
| <i>AD-Mi2G02-F</i>                             | gccatggaggccagtgaaattcATGGAATGTAGCGGAGATTGTTT        |
| <i>AD-Mi2G02-R</i>                             | cagctcgagctcgatggatccTTACAATTTAGCATGAATCTTAACTTTTCG  |
| <i>AD-ShKT-F</i>                               | gccatggaggccagtgaaattcATGTATAAATGTGAGGATAGAAGTGAATTT |
| <i>AD-ΔShKT-F</i>                              | gccatggaggccagtgaaattcATGCATAGTTCTGGTGAAGAACCTAA     |
| <i>AD-ShKT-R</i>                               | cagctcgagctcgatggatccTTAATGACAAACTTTACATTTCTTTGGA    |
| <i>AD-02550-F</i>                              | gccatggaggccagtgaaattcATGCGGATGAGCTGTAATGGA          |
| <i>AD-02550-R</i>                              | cagctcgagctcgatggatccTTAGAGCATAAGCTCAGTCTTACACG      |
| <i>AD-GT-3a-F</i>                              | gccatggaggccagtgaaattcATGGACCGACGTAACCCTTTC          |
| <i>AD-GT-3a-R</i>                              | cagctcgagctcgatggatccTTAGAAACCTTGATTATGATGATCATCA    |
| <i>AD-GT-3a-DB-F</i>                           | gccatggaggccagtgaaattcATGCCACAGTGGAGCATAGAGG         |
| <i>AD-GT-3a-DB-R</i>                           | cagctcgagctcgatggatccTTAAATCGACTGAATCTCATTGTAGAAT    |
| <i>AD-GT-3a-ΔDB-F</i>                          | gccatggaggccagtgaaattcATGTTTGAAGCAAGAATGCAAAGA       |
| <i>Mi2G02-BDF</i>                              | atggccatggaggccgaattcGAATGTAGCGGAGATTGTTCTATAGAG     |
| <i>Mi2G02-BDR</i>                              | ccgctgcaggtcgacggatccTTACAATTTAGCATGAATCTTAACTTTTCG  |
| <i>BD-GT-3a-F</i>                              | atggccatggaggccgaattcATGGACCGACGTAACCCTTTC           |
| <i>BD-GT-3a-R</i>                              | ccgctgcaggtcgacggatccTTAGAAACCTTGATTATGATGATCATCA    |
| <i>BD-GT-3a-DB-F</i>                           | atggccatggaggccgaattcATGCCACAGTGGAGCATAGAGG          |
| <i>BD-GT-3a-DB-R</i>                           | ccgctgcaggtcgacggatccTTAAATCGACTGAATCTCATTGTAGAAT    |
| <i>BD-GT-3a-ΔDB-F</i>                          | atggccatggaggccgaattcATGTTTGAAGCAAGAATGCAAAGA        |
| Primers for vectors of yeast one-hybrid assays |                                                      |
| Primer name                                    | Primer sequence (5'-3')                              |
| <i>PLaczi-SRP34-F</i>                          | ATCTGTGACCTCGAGGAACCTATCTAACAACAAGCC                 |
| <i>PLaczi-SRP34-R</i>                          | GAGCACATGCCTCGAGGTCCAAAGTCAAGATTCAAAC                |
| <i>PLaczi-DVL4-F</i>                           | ATCTGTGACCTCGAGGTAATGAGAGACTTGCAACTTC                |
| <i>PLaczi-DVL4-R</i>                           | GAGCACATGCCTCGAGGAGGATACAAAGAAGAAGAGAG               |
| <i>PLaczi-SKP2-F</i>                           | ATCTGTGACCTCGAGCAAGTCATTTTGGCTTGAAT                  |
| <i>PLaczi-SKP2-R</i>                           | GAGCACATGCCTCGAGTGAAGTGTTCACAGAGCTAG                 |
| <i>PLaczi-FE11-F</i>                           | ATCTGTGACCTCGAGGATTAGGCTTAGCTAAGGTCT                 |
| <i>PLaczi-FE11-R</i>                           | GAGCACATGCCTCGAGGAAGAAGATGACTAATTTGAGC               |
| <i>PLaczi-ABS4-F</i>                           | ATCTGTGACCTCGAGCTTCTCACAGACTTATTTGGTG                |

|                        |                                            |
|------------------------|--------------------------------------------|
| <i>PLaczi-ABS4-R</i>   | GAGCACATGCCTCGAGGATTCTTAAGAGGAGTAACTGG     |
| <i>PLaczi-FEI2-F</i>   | ATCTGTCGACCTCGAGCGCAATAACGATGTTTTAACT      |
| <i>PLaczi-FEI2-R</i>   | GAGCACATGCCTCGAGTGAAGAATAAGACAGAGGAAG      |
| <i>PLaczi-RAD23C-F</i> | ATCTGTCGACCTCGAGCCTATCTGCTATCATTTAATAAGTG  |
| <i>PLaczi-RAD23C-R</i> | GAGCACATGCCTCGAGCTCACCGTCGAAATTCTCTTC      |
| <i>PLaczi-TOZ-F</i>    | ATCTGTCGACCTCGAGGAGATCATACAGAATCGAGATTC    |
| <i>PLaczi-TOZ-R</i>    | GAGCACATGCCTCGAGCATGAACTATATAATTGGCCCA     |
| <i>PLaczi-WRKY2-F</i>  | ATCTGTCGACCTCGAGGTTAGAGATCACCTGTGTTAC      |
| <i>PLaczi-WRKY2-R</i>  | GAGCACATGCCTCGAGGAGAAGAGGAATCTTCGAAAG      |
| <i>pB42AD-01380-F</i>  | TGCCTCTCCCGAATTCATGGACCGACGTAACCC          |
| <i>pB42AD-01380-R</i>  | CGAGTCGGCCGAATTCTAGAAACCTTGATTATGATGATCATC |
